# Supplementary material for: WNT signaling memory is required for ACTIVIN to function as a morphogen in human gastruloids
Source: eLife. 2018 Oct 12;7:e38279. doi: 10.7554/eLife.38279 (PMC6234031; doi:10.7554/eLife.38279)
Supplement: Figure 4—source data 1. [file elife-38279-fig4-data1.xlsx]

## Sheet: Group 1
	read count z-score
Gene	0 h	1 h	2.5 h	4 h	8 h	12 h
AASDH	-0.335	1.022	1.472	-1.007	-0.601	-0.55
AASDHPPT	-0.247	0.254	1.888	-0.78	-0.756	-0.358
AASS	-0.442	-0.076	2.009	-0.513	-0.381	-0.596
ABCA1	-0.515	-0.366	2.019	-0.133	-0.484	-0.521
ABCA5	-0.414	-0.056	1.992	-0.599	-0.651	-0.272
ABCB10	-0.132	0.135	1.926	-0.709	-0.67	-0.55
ABCD3	-0.281	0.383	1.793	-0.889	-0.866	-0.14
ABCE1	-0.327	0.742	1.666	-0.804	-0.865	-0.412
ABHD13	-0.096	0.555	1.621	-0.948	-1.075	-0.058
AC004797.1	-0.014	0.464	1.664	-0.892	-1.097	-0.125
AC005062.2	-0.274	0.864	1.331	-1.186	-0.972	0.238
AC005154.6	-0.487	-0.846	1.938	-0.516	0.06	-0.149
AC005224.2	-0.602	-0.175	1.989	-0.543	-0.079	-0.59
AC005682.5	-1.117	0.296	1.772	-0.061	-0.195	-0.695
AC006160.8	-0.445	-0.148	1.98	-0.359	-0.198	-0.831
AC006273.5	0.355	0.801	0.765	-0.485	-1.809	0.373
AC006465.3	-0.341	1.056	1.467	-0.857	-0.61	-0.716
AC006978.6	-0.403	-0.146	2.013	-0.476	-0.653	-0.334
AC007390.5	-0.348	0.373	1.835	-0.424	-0.434	-1.002
AC008443.1	-0.611	-0.073	1.61	0.574	-0.215	-1.285
AC009299.3	-0.182	0.587	1.547	-0.944	-1.148	0.139
AC018865.8	-0.35	0.099	1.92	-0.623	-0.171	-0.875
AC069277.2	-0.911	0.526	1.711	-0.921	-0.333	-0.073
AC073343.1	-0.306	-0.01	1.989	-0.582	-0.639	-0.452
AC073346.2	0.139	1.295	0.717	-1.314	-1.016	0.179
AC083799.1	-0.469	0.545	1.764	-0.745	-0.876	-0.218
AC083843.1	-0.356	0.396	1.862	-0.66	-0.764	-0.478
AC092835.2	-0.404	-0.145	1.996	-0.664	-0.19	-0.595
AC144521.1	-0.958	0.861	1.461	-0.569	0.136	-0.93
ACADM	-0.258	0.226	1.847	-0.864	-0.845	-0.106
ACADSB	-0.543	0.147	1.964	-0.588	-0.523	-0.456
ACAP2	-0.468	0.413	1.871	-0.667	-0.611	-0.539
ACBD3	-0.382	-0.058	1.999	-0.685	-0.467	-0.407
ACBD5	-0.443	0.672	1.71	-0.807	-0.307	-0.825
ACSL3	-0.399	0.112	1.967	-0.671	-0.475	-0.533
ACSL4	-0.274	0.614	1.716	-0.813	-0.914	-0.329
ACTR2	-0.386	0.52	1.814	-0.77	-0.556	-0.621
ACTR6	0.092	1.11	1	-0.997	-1.323	0.117
ACVR2A	-0.303	0.159	1.944	-0.483	-0.708	-0.608
ADAM10	-0.411	0.176	1.948	-0.616	-0.658	-0.44
ADAM1A	-0.481	-0.262	2.007	-0.48	-0.135	-0.649
ADAM22	-0.35	0.094	1.939	-0.779	-0.237	-0.666
ADAM9	-0.363	0.394	1.859	-0.765	-0.697	-0.429
ADAMTS1	-0.762	-0.604	1.939	0.038	-0.077	-0.534
ADAMTS19	-0.325	-0.199	1.994	-0.428	-0.244	-0.799
ADAMTS20	-0.362	-0.034	2	-0.563	-0.587	-0.454
ADAMTS3	-0.482	0.238	1.908	-0.485	-0.328	-0.852
ADAMTS5	-0.731	-0.738	1.896	0.24	-0.182	-0.485
ADAT2	-0.432	-0.075	1.999	-0.58	-0.281	-0.631
ADD3	-0.414	0.803	1.666	-0.711	-0.638	-0.705
ADNP	-0.387	0.082	1.869	-0.269	-0.177	-1.117
ADSS	-0.261	0.278	1.888	-0.845	-0.451	-0.609
AEBP2	-0.38	0.024	1.989	-0.619	-0.532	-0.483
AF165138.7	-0.295	0.652	1.467	-0.987	-1.13	0.293
AFF1	-0.591	-0.524	1.998	-0.168	-0.131	-0.584
AFF3	-0.595	-0.171	1.853	-0.33	0.249	-1.006
AFF4	-0.466	0.373	1.887	-0.671	-0.524	-0.6
AFTPH	-0.276	0.954	1.523	-0.961	-0.591	-0.648
AGGF1	-0.377	0.227	1.92	-0.815	-0.512	-0.441
AGL	-0.336	0.425	1.83	-0.728	-0.839	-0.352
AGO4	-0.526	-0.85	1.943	-0.333	0.091	-0.325
AGPAT5	-0.4	0.431	1.811	-0.601	-0.272	-0.97
AGPS	-0.386	0.256	1.911	-0.816	-0.511	-0.454
AGTPBP1	-0.395	0.778	1.676	-0.786	-0.597	-0.676
AHCTF1	-0.421	0.275	1.922	-0.626	-0.571	-0.579
AHI1	-0.466	0.329	1.896	-0.706	-0.645	-0.407
AHR	-0.376	-0.341	2.036	-0.54	-0.416	-0.364
AIDA	-0.347	0.137	1.949	-0.736	-0.599	-0.404
AIMP1	-0.206	0.331	1.665	-1.129	-0.871	0.21
AK3	-0.279	0.798	1.635	-0.633	-0.924	-0.597
AK3P3	-0.515	0.35	1.895	-0.539	-0.499	-0.693
AK9	-0.348	0.556	1.78	-0.89	-0.599	-0.499
AKAP11	-0.412	0.2	1.942	-0.685	-0.567	-0.478
AKAP12	-0.418	-0.283	2.03	-0.559	-0.294	-0.476
AKAP5	-0.23	-0.077	1.968	-0.517	-0.844	-0.3
AKAP7	-0.046	1.027	1.305	-1.048	-1.052	-0.186
AKAP9	-0.164	0.261	1.745	-0.844	-1.069	0.071
AKT3	-0.491	-0.032	1.986	-0.74	-0.41	-0.313
AL449209.1	-0.749	0.824	1.378	-1.069	0.375	-0.76
ALCAM	-0.269	0.529	1.781	-0.711	-0.87	-0.461
ALDH1L2	-0.561	0.491	1.808	-0.724	-0.244	-0.77
ALG10	-0.232	0.013	1.921	-0.979	-0.496	-0.227
ALG10B	-0.483	0.247	1.919	-0.713	-0.332	-0.637
ALG11	-0.379	0.242	1.913	-0.762	-0.358	-0.656
ALKBH8	-0.328	0.508	1.789	-0.894	-0.704	-0.371
ALMS1	-0.44	0.069	1.98	-0.649	-0.487	-0.473
ALMS1-IT1	-0.454	-0.339	2.036	-0.44	-0.495	-0.308
AMD1	-0.186	0.642	1.675	-0.75	-1.032	-0.349
AMER2	-0.572	-0.477	1.981	0.069	-0.591	-0.409
AMIGO2	-1.132	-0.999	1.58	0.341	-0.103	0.313
AMMECR1	-0.38	0.353	1.848	-0.714	-0.243	-0.863
AMN1	-0.267	0.572	1.685	-1.201	-0.464	-0.324
ANAPC10	-0.111	1.663	0.542	-0.974	-0.981	-0.138
ANAPC4	-0.397	0.274	1.892	-0.872	-0.555	-0.342
ANGEL2	-0.545	0.702	1.692	-0.711	-0.256	-0.883
ANGPT1	-0.91	-0.619	0.652	-0.837	0.085	1.63
ANK2	-0.453	-0.056	1.995	-0.47	-0.312	-0.703
ANK3	-0.406	0.564	1.794	-0.76	-0.675	-0.517
ANKHD1	-0.317	0.144	1.953	-0.609	-0.529	-0.643
ANKIB1	-0.394	0.436	1.856	-0.713	-0.589	-0.596
ANKMY2	-0.329	0.691	1.668	-1.069	-0.599	-0.361
ANKRD10	-0.402	0.485	1.833	-0.555	-0.752	-0.609
ANKRD10-IT1	-0.437	-0.169	2.025	-0.542	-0.483	-0.393
ANKRD12	-0.138	1.018	1.165	-0.902	-1.32	0.177
ANKRD13C	-0.213	0.501	1.794	-0.665	-0.848	-0.569
ANKRD17	-0.382	-0.395	1.938	-0.278	0.045	-0.928
ANKRD18A	-0.475	0.407	1.84	-0.301	-0.58	-0.891
ANKRD18B	-0.202	0.644	1.664	-0.474	-0.485	-1.147
ANKRD18CP	-0.402	-0.186	2.027	-0.505	-0.434	-0.501
ANKRD26	-0.305	1.346	1.156	-0.913	-0.865	-0.419
ANKRD28	-0.381	0.372	1.88	-0.718	-0.549	-0.605
ANKRD32	-0.337	0.79	1.567	-0.944	-0.949	-0.127
ANKRD34B	-0.245	0.828	1.622	-0.703	-0.73	-0.773
ANKRD36	-0.499	-0.1	2.013	-0.36	-0.577	-0.476
ANKRD36B	-0.178	-0.19	1.972	-0.882	-0.309	-0.413
ANKRD36C	-0.476	-0.391	2.022	-0.366	-0.189	-0.601
ANKRD46	-0.227	1.433	1	-1.107	-0.73	-0.368
ANKRD49	-0.294	1.235	1.293	-0.798	-0.876	-0.56
ANKRD50	-0.391	-0.048	2.002	-0.64	-0.482	-0.44
ANLN	-0.302	0.965	1.531	-0.764	-0.837	-0.594
ANO5	-0.411	0.499	1.83	-0.672	-0.559	-0.687
ANO6	-0.446	0.664	1.698	-0.509	-0.366	-1.041
ANP32E	-0.41	0.119	1.961	-0.648	-0.635	-0.387
ANPEP	0.546	0.282	0.477	0.407	0.32	-2.032
AP001888.1	-0.677	-0.708	1.595	0.923	-0.574	-0.561
AP1AR	-0.21	0.274	1.793	-0.905	-0.92	-0.032
AP1S2	-0.317	0.813	1.632	-0.804	-0.822	-0.502
AP4E1	-0.444	0.393	1.878	-0.671	-0.595	-0.562
AP5M1	-0.297	0.73	1.657	-0.932	-0.797	-0.361
APC	-0.443	0.389	1.865	-0.762	-0.676	-0.372
API5	-0.493	0.355	1.87	-0.636	-0.294	-0.802
APLF	-0.402	0.406	1.812	-0.995	-0.586	-0.236
APOB	-0.434	-0.115	2.016	-0.489	-0.399	-0.578
APPBP2	-0.14	0.286	1.857	-0.933	-0.583	-0.488
APPL1	-0.468	0.417	1.867	-0.71	-0.598	-0.508
AQR	-0.393	0.998	1.489	-0.658	-0.428	-1.008
ARAP2	-0.335	0.097	1.967	-0.61	-0.637	-0.483
ARFGEF1	-0.45	0.104	1.969	-0.67	-0.532	-0.421
ARFGEF2	-0.404	0.645	1.746	-0.673	-0.489	-0.824
ARFIP1	-0.22	0.634	1.694	-0.821	-0.94	-0.347
ARGLU1	-0.431	0.7	1.702	-0.439	-0.587	-0.944
ARHGAP11A	-0.38	0.074	1.973	-0.65	-0.608	-0.41
ARHGAP12	-0.373	0.442	1.827	-0.751	-0.807	-0.338
ARHGAP18	-0.416	0.821	1.642	-0.817	-0.746	-0.484
ARHGAP21	-0.488	-0.006	1.998	-0.471	-0.44	-0.594
ARHGAP28	-0.433	0.463	1.839	-0.684	-0.744	-0.44
ARHGAP29	-0.464	0.525	1.822	-0.606	-0.699	-0.577
ARHGAP42	-0.35	0.218	1.924	-0.69	-0.7	-0.402
ARHGAP5	-0.318	0.318	1.855	-0.783	-0.827	-0.245
ARHGEF12	-0.37	-0.066	1.97	-0.767	-0.164	-0.602
ARHGEF26	-0.47	0.197	1.873	-0.205	-0.369	-1.026
ARHGEF33	-0.36	0.578	1.771	-0.641	-0.875	-0.473
ARID2	-0.442	0.148	1.961	-0.537	-0.497	-0.633
ARID4A	-0.276	0.316	1.837	-0.752	-0.917	-0.207
ARID4B	-0.445	-0.008	1.992	-0.582	-0.619	-0.338
ARL1	-0.18	0.652	1.679	-0.983	-0.779	-0.389
ARL13B	-0.295	0.216	1.908	-0.8	-0.679	-0.351
ARL14EP	-0.242	0.567	1.603	-1.114	-0.896	0.081
ARL15	-0.304	0.837	1.624	-0.827	-0.679	-0.651
ARL5A	-0.006	0.298	1.603	-1.036	-1.1	0.242
ARL5B	-0.264	0.313	1.828	-0.774	-0.929	-0.174
ARL6	-0.065	0.744	1.503	-0.854	-1.198	-0.132
ARMC8	-0.359	0.614	1.763	-0.727	-0.536	-0.755
ARMCX4	-0.338	-0.849	1.737	-0.037	0.456	-0.969
ARMCX5	-0.316	0.922	1.54	-0.509	-0.62	-1.017
ARNTL2	-0.356	0.091	1.915	-0.396	-0.27	-0.984
ARPP19	-0.441	0.927	1.581	-0.683	-0.593	-0.792
ARRDC3	-0.216	0.84	1.607	-0.697	-0.791	-0.744
ARSJ	-0.626	-0.235	2.002	-0.11	-0.505	-0.526
ARSK	-0.694	0.711	1.709	-0.729	-0.323	-0.675
ASAH1	-0.435	0.521	1.813	-0.78	-0.647	-0.472
ASAH2B	-0.408	-0.13	2.005	-0.684	-0.498	-0.286
ASAP1	-0.481	-0.053	1.954	-0.238	-0.281	-0.901
ASAP2	-0.618	-0.345	1.984	0.001	-0.365	-0.656
ASCC3	-0.4	0.991	1.532	-0.77	-0.682	-0.672
ASH1L	-0.433	-0.172	2.015	-0.619	-0.282	-0.51
ASNSD1	-0.283	0.294	1.824	-0.938	-0.784	-0.112
ASPH	-0.384	0.417	1.864	-0.569	-0.649	-0.678
ASPM	-0.279	0.16	1.834	-0.785	-0.958	0.028
ASUN	-0.372	0.344	1.834	-0.974	-0.621	-0.211
ASXL2	-0.482	0.203	1.901	-0.399	-0.293	-0.931
ATAD1	-0.369	0.254	1.871	-0.989	-0.501	-0.267
ATAD2	-0.329	0.356	1.881	-0.658	-0.71	-0.54
ATAD2B	-0.39	0.132	1.949	-0.746	-0.588	-0.358
ATAD5	-0.345	0.36	1.864	-0.693	-0.808	-0.377
ATF1	-0.307	0.556	1.651	-1.017	-0.913	0.029
ATF2	-0.408	0.677	1.709	-0.884	-0.74	-0.355
ATF7IP	-0.429	-0.079	1.97	-0.437	-0.188	-0.838
ATG12	-0.294	0.497	1.817	-0.698	-0.7	-0.623
ATG2B	-0.415	0.455	1.843	-0.751	-0.465	-0.666
ATG4C	-0.412	0.234	1.864	-0.966	-0.594	-0.126
ATG5	-0.155	0.846	1.489	-1.028	-0.979	-0.173
ATL2	-0.404	0.554	1.804	-0.645	-0.686	-0.624
ATM	-0.38	-0.064	2	-0.621	-0.591	-0.342
ATP11B	-0.393	0.42	1.862	-0.696	-0.641	-0.551
ATP11C	-0.349	0.156	1.936	-0.69	-0.724	-0.328
ATP13A3	-0.368	0.04	1.979	-0.646	-0.616	-0.388
ATP2B1	-0.367	0.069	1.973	-0.616	-0.651	-0.408
ATP6V1A	-0.463	1.009	1.445	-0.539	-0.315	-1.137
ATP6V1C1	-0.364	0.419	1.858	-0.74	-0.644	-0.528
ATP7A	-0.467	0.07	1.965	-0.729	-0.288	-0.551
ATP8A1	-0.414	0.378	1.88	-0.721	-0.569	-0.554
ATP8B1	-0.453	0.225	1.928	-0.622	-0.368	-0.711
ATR	-0.509	0.676	1.747	-0.728	-0.596	-0.59
ATRX	-0.358	0.244	1.901	-0.715	-0.774	-0.299
ATXN1	-0.796	0.084	1.889	-0.857	-0.203	-0.118
ATXN3	-0.387	-0.019	1.93	-0.882	-0.586	-0.055
ATXN7	-0.432	-0.142	1.994	-0.353	-0.284	-0.783
AUTS2	-0.815	-0.857	1.476	0.939	-0.008	-0.735
AZI2	-0.179	0.335	1.811	-0.86	-0.887	-0.221
AZIN1	-0.543	0.504	1.819	-0.475	-0.472	-0.833
B3GALNT1	-0.29	0.382	1.852	-0.816	-0.703	-0.425
B3GALTL	-0.372	0.87	1.564	-0.385	-0.608	-1.068
B3GAT2	-0.365	0.503	1.822	-0.59	-0.752	-0.618
B3GNT5	-0.312	0.339	1.875	-0.643	-0.811	-0.447
B4GALNT1	0.638	0.599	0.017	0.617	0.09	-1.961
B4GALT6	-0.313	0.123	1.93	-0.772	-0.705	-0.263
BACH1	-0.488	0.204	1.944	-0.662	-0.548	-0.45
BAG4	-0.274	0.814	1.635	-0.626	-0.791	-0.758
BAG5	-0.48	-0.035	1.986	-0.608	-0.23	-0.633
BANK1	-0.656	0.537	1.806	-0.361	-0.741	-0.584
BARD1	-0.373	0.239	1.928	-0.592	-0.514	-0.688
BAZ1A	-0.465	0.153	1.96	-0.574	-0.625	-0.449
BAZ2B	-0.422	0.008	1.992	-0.576	-0.603	-0.398
BBS10	-0.295	0.201	1.887	-0.818	-0.777	-0.199
BBS7	-0.366	0.593	1.751	-0.827	-0.8	-0.351
BBX	-0.439	0.434	1.856	-0.719	-0.661	-0.47
BCAP29	-0.158	0.795	1.457	-1.055	-1.052	0.014
BCAS2	-0.258	-0.016	1.876	-0.874	-0.804	0.076
BCAT1	-0.458	0.266	1.922	-0.682	-0.603	-0.444
BCCIP	-0.128	0.279	1.785	-0.943	-0.907	-0.086
BCL10	-0.642	0.379	1.778	-0.209	-0.213	-1.093
BCL11A	-0.813	-0.886	1.869	-0.194	-0.097	0.121
BCL11B	-0.519	-0.709	1.999	-0.175	-0.191	-0.406
BCL2L11	-0.732	-0.447	1.862	-0.287	0.366	-0.762
BCLAF1	-0.324	0.295	1.864	-0.758	-0.838	-0.238
BCOR	-0.664	-0.64	1.892	0.046	0.113	-0.747
BDP1	-0.294	0.016	1.954	-0.641	-0.789	-0.246
BEND4	-0.344	0.062	1.958	-0.772	-0.31	-0.594
BEND6	-0.187	0.193	1.873	-0.857	-0.796	-0.226
BET1	-0.254	0.285	1.826	-0.997	-0.711	-0.149
BHLHE40	-0.936	-0.112	1.908	0.007	-0.213	-0.653
BIRC2	-0.264	0.684	1.647	-0.908	-0.934	-0.226
BIRC6	-0.453	0.068	1.974	-0.689	-0.374	-0.526
BIVM	-0.486	0.749	1.666	-0.652	-0.332	-0.945
BLM	-0.29	0.627	1.724	-0.836	-0.839	-0.386
BLOC1S6	-0.492	0.103	1.971	-0.622	-0.391	-0.569
BLZF1	-0.081	0.607	1.415	-1.101	-1.147	0.307
BMI1	-0.363	0.568	1.79	-0.736	-0.567	-0.692
BMP2K	-0.449	-0.185	2.021	-0.429	-0.339	-0.617
BMPR1A	-0.465	0.423	1.868	-0.666	-0.592	-0.567
BMPR1B	-0.462	0.545	1.812	-0.7	-0.587	-0.609
BMPR2	-0.605	-0.515	1.98	0.005	-0.238	-0.627
BMS1	-0.502	-0.021	1.964	-0.727	-0.126	-0.587
BNC2	-0.389	0.133	1.947	-0.526	-0.374	-0.79
BNIP2	-0.319	0.052	1.964	-0.667	-0.695	-0.335
BNIP3L	-0.39	0.356	1.889	-0.545	-0.66	-0.649
BOD1L1	-0.424	-0.133	2.019	-0.556	-0.508	-0.397
BPTF	-0.401	-0.287	2.036	-0.461	-0.4	-0.488
BRCA1	-0.449	0.493	1.834	-0.711	-0.538	-0.629
BRCA2	-0.345	0.872	1.548	-0.911	-0.911	-0.254
BRCC3	-0.478	0.321	1.905	-0.611	-0.472	-0.666
BRIP1	-0.418	0.569	1.792	-0.704	-0.734	-0.506
BRIX1	-0.344	0.968	1.541	-0.666	-0.788	-0.711
BRMS1L	-0.37	0.466	1.809	-0.774	-0.827	-0.303
BROX	-0.344	0.327	1.896	-0.596	-0.656	-0.627
BRWD1	-0.342	0.266	1.909	-0.611	-0.77	-0.451
BRWD3	-0.405	0.002	1.986	-0.715	-0.487	-0.381
BTAF1	-0.402	0.507	1.82	-0.76	-0.502	-0.662
BTBD1	0.038	0.229	1.708	-0.889	-1.113	0.027
BTBD7	-0.527	-0.176	1.97	-0.404	-0.062	-0.801
BZW1	-0.234	0.346	1.762	-0.978	-0.874	-0.022
BZW1P2	-0.103	0.509	1.7	-1.041	-0.839	-0.225
C10orf118	-0.376	0.145	1.899	-0.84	-0.716	-0.114
C10orf12	-0.383	-0.191	1.974	-0.42	-0.129	-0.852
C10orf32	-0.392	0.559	1.787	-0.737	-0.438	-0.778
C11orf58	-0.209	0.181	1.85	-0.964	-0.747	-0.111
C11orf82	-0.429	0.476	1.837	-0.763	-0.614	-0.507
C12orf23	-0.341	0.564	1.778	-0.738	-0.805	-0.458
C12orf4	-0.324	1.032	1.364	-1.147	-0.799	-0.125
C16orf52	-0.401	0.342	1.893	-0.682	-0.496	-0.655
C16orf87	-0.168	0.253	1.759	-1.138	-0.72	0.014
C17orf104	-0.133	1.151	1.111	-1.024	-1.172	0.066
C18orf25	-0.52	0.506	1.805	-0.563	-0.348	-0.881
C18orf54	-0.327	0.028	1.974	-0.707	-0.6	-0.368
C1D	-0.115	1.041	1.152	-1.232	-1.015	0.169
C1GALT1	-0.32	0.317	1.861	-0.798	-0.791	-0.269
C1orf27	-0.368	0.512	1.783	-0.876	-0.754	-0.296
C1orf63	-0.262	0.338	1.872	-0.486	-0.8	-0.661
C1QL3	-0.147	0.648	1.636	-0.323	-1.164	-0.65
C21orf91	-0.376	0.205	1.906	-0.768	-0.734	-0.234
C2CD5	-0.424	0.421	1.862	-0.722	-0.625	-0.512
C2orf69	-0.24	0.164	1.911	-0.809	-0.719	-0.306
C3	0.886	0.249	-0.411	0.121	0.922	-1.766
C3orf17	-0.404	0.255	1.917	-0.766	-0.558	-0.445
C3orf58	0.028	-0.378	1.973	-0.659	-0.661	-0.303
C4orf21	-0.345	0.662	1.706	-0.703	-0.95	-0.371
C4orf27	-0.261	-0.067	1.875	-0.941	-0.716	0.111
C4orf29	-0.547	0.189	1.9	-0.494	-0.161	-0.887
C4orf32	-0.364	-0.516	1.935	-0.725	0.207	-0.537
C4orf33	-0.191	0.536	1.577	-0.972	-1.104	0.155
C4orf46	-0.391	0.597	1.775	-0.582	-0.593	-0.806
C5orf22	-0.478	0.752	1.681	-0.679	-0.406	-0.87
C5orf24	-0.499	0.009	1.995	-0.523	-0.411	-0.572
C5orf28	-0.369	0.718	1.658	-0.902	-0.849	-0.256
C5orf30	-0.366	0.852	1.608	-0.45	-0.811	-0.833
C5orf34	-0.378	0.36	1.876	-0.791	-0.615	-0.452
C5orf42	-0.474	0.318	1.907	-0.678	-0.561	-0.512
C5orf51	-0.434	0.539	1.814	-0.655	-0.661	-0.604
C6orf120	-0.175	0.093	1.886	-0.757	-0.899	-0.148
C6orf211	-0.204	0.185	1.79	-0.915	-0.937	0.08
C6orf62	-0.381	0.02	1.923	-0.26	-0.301	-1
C7orf60	0.03	0.627	1.427	-1.048	-1.201	0.164
C7orf63	-0.456	0.481	1.831	-0.811	-0.565	-0.479
C8orf37	-0.368	-0.071	2.006	-0.62	-0.491	-0.456
C9orf41	-0.368	0.235	1.915	-0.742	-0.681	-0.359
C9orf72	-0.36	0.701	1.713	-0.841	-0.645	-0.568
CAB39	-0.308	0.378	1.867	-0.76	-0.533	-0.644
CACNA2D1	-0.425	0.105	1.973	-0.578	-0.576	-0.499
CACNB2	-0.57	0.65	1.736	-0.786	-0.303	-0.727
CACNB4	-0.373	0.704	1.693	-0.669	-0.937	-0.418
CACUL1	-0.483	0.011	1.927	-0.353	-0.15	-0.952
CADM2	-0.907	0.433	1.834	-0.438	-0.534	-0.387
CALB1	-0.743	-0.613	1.293	-0.732	-0.482	1.278
CALCRL	0.158	0.951	0.923	-1.004	-1.431	0.403
CALD1	-0.493	0.197	1.94	-0.701	-0.573	-0.369
CAMK2D	-0.377	0.04	1.935	-0.865	-0.15	-0.583
CAMK4	-0.542	0.371	1.892	-0.58	-0.588	-0.554
CAMSAP2	-0.366	-0.012	1.995	-0.591	-0.581	-0.444
CAND1	-0.338	0.487	1.821	-0.773	-0.691	-0.506
CAPN7	-0.205	0.704	1.62	-0.975	-0.914	-0.231
CAPRIN2	-0.484	0.455	1.827	-0.563	-0.35	-0.885
CAPS2	-0.431	0.715	1.716	-0.745	-0.714	-0.541
CAPZA1	-0.156	1.147	1.314	-0.847	-1.005	-0.453
CAPZA2	0.052	1.001	1.086	-1.004	-1.331	0.196
CARF	-0.494	0.481	1.845	-0.605	-0.578	-0.649
CASC4	-0.365	0.502	1.822	-0.573	-0.642	-0.744
CASC5	-0.254	0.034	1.94	-0.728	-0.769	-0.222
CASD1	-0.303	0.318	1.877	-0.733	-0.773	-0.387
CASK	-0.378	-0.065	1.969	-0.564	-0.17	-0.792
CASP3	-0.531	0.039	1.842	-0.883	-0.698	0.232
CASP8AP2	-0.332	0.617	1.727	-0.758	-0.913	-0.342
CAV1	-0.968	-0.519	1.863	-0.513	-0.089	0.225
CAV2	-0.919	-0.161	1.959	-0.138	-0.363	-0.378
CBLL1	-0.507	-0.012	1.934	-0.542	-0.033	-0.841
CBR4	-0.477	0.517	1.819	-0.766	-0.617	-0.476
CBWD1	-0.312	-0.472	1.897	-0.925	-0.416	0.229
CBWD2	-0.382	-0.106	1.963	-0.86	-0.482	-0.133
CBWD3	-0.333	-0.071	1.959	-0.711	-0.725	-0.12
CBWD6	-0.281	0.311	1.891	-0.748	-0.622	-0.55
CBX3	-0.313	-0.061	1.896	-0.833	-0.776	0.087
CCAR1	-0.455	0.614	1.777	-0.572	-0.674	-0.691
CCDC110	-0.016	0.997	1.372	-1.005	-0.993	-0.355
CCDC111	-0.394	0.612	1.635	-1.031	-0.857	0.033
CCDC112	0.071	0.595	1.249	-1.194	-1.196	0.475
CCDC121	-0.19	0.669	1.692	-0.899	-0.77	-0.502
CCDC122	-0.395	1.446	1.094	-0.753	-0.597	-0.795
CCDC126	0.186	1.154	1.041	-1.121	-1.13	-0.13
CCDC132	-0.112	0.739	1.424	-1.046	-1.14	0.134
CCDC138	-0.14	0.728	1.568	-0.913	-1.061	-0.182
CCDC14	-0.44	0.72	1.719	-0.691	-0.656	-0.652
CCDC141	-0.447	0.477	1.835	-0.796	-0.558	-0.511
CCDC144A	-0.411	-0.242	2.03	-0.568	-0.426	-0.383
CCDC144B	-0.322	0.089	1.959	-0.538	-0.426	-0.762
CCDC147	-0.587	-0.327	2.014	-0.571	-0.376	-0.153
CCDC15	-0.42	0.707	1.715	-0.737	-0.774	-0.49
CCDC150	-0.469	0.373	1.888	-0.622	-0.545	-0.625
CCDC152	-0.392	0.983	1.459	-1.089	-0.709	-0.252
CCDC160	-0.354	0.315	1.898	-0.68	-0.507	-0.672
CCDC169	-0.419	1.044	1.493	-0.702	-0.779	-0.637
CCDC171	-0.467	0.594	1.784	-0.715	-0.493	-0.702
CCDC18	-0.108	0.758	1.459	-0.893	-1.22	0.004
CCDC181	0.136	0.576	1.284	-1.286	-1.096	0.386
CCDC41	-0.177	0.293	1.758	-0.911	-0.98	0.016
CCDC43	-0.336	0.185	1.914	-0.778	-0.266	-0.718
CCDC47	-0.503	0.087	1.949	-0.579	-0.203	-0.751
CCDC59	-0.383	0.526	1.649	-1.07	-0.836	0.113
CCDC66	-0.113	0.5	1.677	-0.852	-1.087	-0.125
CCDC82	-0.236	0.492	1.665	-0.957	-1.006	0.042
CCDC88A	-0.417	0.446	1.831	-0.799	-0.72	-0.34
CCDC91	-0.297	0.41	1.844	-0.832	-0.651	-0.474
CCL2	-0.549	0.407	1.751	-0.135	-0.313	-1.162
CCNC	0.072	0.802	0.976	-1.391	-1.054	0.595
CCNE2	-0.454	-0.027	1.992	-0.61	-0.603	-0.299
CCNG1	0.026	1.17	1.185	-0.835	-1.183	-0.362
CCNG2	-0.617	-0.366	2.026	-0.431	-0.373	-0.239
CCNH	-0.088	0.404	1.566	-1.083	-1.064	0.266
CCNJ	-0.295	0.405	1.858	-0.696	-0.604	-0.668
CCNL1	-0.441	0.317	1.905	-0.543	-0.543	-0.696
CCNT1	-0.333	0.191	1.858	-0.731	-0.056	-0.93
CCNT2	-0.348	0.468	1.822	-0.759	-0.769	-0.414
CCP110	-0.382	0.248	1.925	-0.642	-0.658	-0.49
CCPG1	-0.343	0.263	1.762	-1.054	-0.76	0.132
CCSAP	-0.343	0.369	1.879	-0.648	-0.562	-0.694
CCSER1	-0.461	0.849	1.599	-0.98	-0.359	-0.648
CCSER2	-0.371	0.481	1.832	-0.707	-0.536	-0.699
CCT6B	0.075	0.798	1.168	-0.947	-1.413	0.319
CCT6P1	-0.473	0.39	1.86	-0.389	-0.532	-0.856
CCT6P3	-0.443	-0.021	1.815	-0.432	0.212	-1.131
CCT8	-0.228	0.679	1.65	-1.086	-0.696	-0.318
CD109	-0.395	0.293	1.907	-0.642	-0.45	-0.713
CD164	-0.246	0.409	1.799	-0.853	-0.866	-0.243
CD2AP	-0.35	0.025	1.945	-0.711	-0.751	-0.158
CD36	-0.353	0.896	1.551	-0.944	-0.813	-0.337
CD46	-0.429	0.533	1.814	-0.638	-0.546	-0.732
CD58	-0.349	0.967	1.531	-0.829	-0.516	-0.803
CDC14A	-0.406	0.758	1.516	-0.199	-0.321	-1.349
CDC27	-0.276	1.125	1.4	-0.797	-0.785	-0.667
CDC37L1	0.004	0.196	1.714	-1.096	-0.903	0.085
CDC40	-0.473	0.44	1.837	-0.737	-0.315	-0.751
CDC42BPA	-0.434	-0.097	2.011	-0.595	-0.365	-0.52
CDC42EP3	-0.514	-0.14	1.974	-0.6	-0.042	-0.678
CDC5L	-0.177	0.794	1.581	-0.88	-0.973	-0.345
CDC7	-0.45	0.312	1.905	-0.686	-0.623	-0.458
CDC73	-0.355	0.81	1.646	-0.793	-0.763	-0.545
CDH8	-0.377	-0.217	1.975	-0.452	-0.094	-0.835
CDK1	0.046	0.78	1.156	-1.155	-1.243	0.416
CDK14	-0.53	0.582	1.777	-0.873	-0.453	-0.503
CDK17	-0.292	0.304	1.896	-0.599	-0.738	-0.571
CDK6	-0.461	-0.078	2.012	-0.57	-0.452	-0.452
CDK7	-0.286	0.435	1.791	-0.832	-0.883	-0.225
CDKL2	-0.28	0.531	1.791	-0.837	-0.555	-0.651
CDKL5	-0.457	0.52	1.796	-0.872	-0.337	-0.649
CDKN2AIP	-0.255	0.863	1.579	-0.905	-0.813	-0.468
CDS1	-0.158	-0.068	1.971	-0.524	-0.43	-0.79
CEBPZ	-0.239	0.274	1.765	-0.9	-0.968	0.067
CELF2	-0.418	0.108	1.969	-0.563	-0.456	-0.641
CENPC	-0.319	0.111	1.911	-0.72	-0.832	-0.152
CENPE	0.011	0.649	1.111	-0.91	-1.467	0.605
CENPF	-0.391	0.157	1.932	-0.704	-0.718	-0.277
CENPI	-0.231	-0.07	1.963	-0.886	-0.356	-0.421
CENPJ	-0.395	0.596	1.778	-0.737	-0.7	-0.543
CENPK	-0.052	1.026	1.15	-1.106	-1.173	0.156
CENPQ	0.041	1.348	0.682	-1.09	-1.214	0.232
CEP112	-0.394	0.452	1.832	-0.683	-0.813	-0.393
CEP120	-0.354	0.645	1.748	-0.743	-0.731	-0.565
CEP128	-0.475	-0.06	2.006	-0.614	-0.405	-0.453
CEP135	-0.482	0.376	1.888	-0.613	-0.616	-0.553
CEP152	-0.504	0.729	1.714	-0.718	-0.706	-0.514
CEP170	-0.398	0.462	1.845	-0.682	-0.68	-0.547
CEP192	-0.465	0.761	1.679	-0.647	-0.459	-0.869
CEP290	-0.19	0.833	1.382	-0.999	-1.159	0.133
CEP350	-0.421	0.087	1.972	-0.649	-0.582	-0.407
CEP44	-0.353	1.034	1.49	-0.671	-0.672	-0.828
CEP55	-0.361	0.278	1.757	-1.09	-0.708	0.123
CEP57	-0.273	0.74	1.618	-0.995	-0.843	-0.246
CEP57L1	-0.174	0.803	1.338	-1.04	-1.179	0.252
CEP63	-0.251	0.122	1.932	-0.72	-0.746	-0.337
CEP70	-0.082	0.652	1.385	-1.076	-1.183	0.305
CEP78	-0.415	0.219	1.868	-0.451	-0.197	-1.024
CEP85L	-0.153	0.485	1.721	-0.769	-1.069	-0.214
CEP97	-0.471	0.335	1.902	-0.655	-0.592	-0.518
CERS6	-0.388	0.627	1.753	-0.835	-0.488	-0.669
CETN3	0.015	1.165	0.941	-1.231	-1.095	0.205
CFL2	-0.284	0.784	1.615	-0.848	-0.928	-0.34
CFTR	-0.369	0.837	1.634	-0.763	-0.587	-0.752
CGGBP1	-0.467	0.533	1.817	-0.704	-0.653	-0.525
CHD1	-0.269	0.204	1.89	-0.732	-0.846	-0.248
CHD6	-0.46	0.043	1.941	-0.628	-0.115	-0.782
CHD7	-0.482	-0.504	1.97	-0.104	-0.097	-0.783
CHD9	-0.393	0.333	1.888	-0.671	-0.738	-0.418
CHEK1	-0.538	0.462	1.851	-0.581	-0.496	-0.697
CHIC1	-0.464	0.54	1.787	-0.74	-0.808	-0.314
CHM	-0.46	1.099	1.444	-0.815	-0.746	-0.522
CHML	-0.249	0.314	1.837	-0.777	-0.9	-0.225
CHMP2B	-0.066	0.949	1.423	-0.858	-1.101	-0.346
CHN2	-0.722	1.433	0.963	0.025	-0.686	-1.013
CHORDC1	-0.052	0.224	1.648	-1.066	-1.014	0.26
CHRNA9	-0.586	0.299	1.895	-0.792	-0.322	-0.494
CHST9	0.03	0.512	1.54	-0.852	-1.279	0.049
CHUK	-0.231	0.549	1.754	-0.801	-0.883	-0.388
CHURC1	-0.543	0.373	1.881	-0.654	-0.38	-0.677
CIR1	-0.122	0.279	1.663	-1.052	-0.993	0.225
CKAP2	-0.249	1.042	1.443	-0.92	-0.827	-0.49
CKAP2L	-0.437	0.512	1.821	-0.729	-0.676	-0.491
CLCN3	-0.368	0.18	1.93	-0.831	-0.449	-0.463
CLDN12	-0.35	0.341	1.886	-0.739	-0.631	-0.508
CLGN	-0.267	0.529	1.597	-0.92	-1.106	0.168
CLHC1	-0.379	0.264	1.803	-0.982	-0.756	0.05
CLIC4	-0.417	1.042	1.495	-0.677	-0.68	-0.763
CLINT1	-0.324	0.846	1.618	-0.672	-0.609	-0.86
CLIP1	-0.441	0.067	1.983	-0.589	-0.499	-0.521
CLK1	-0.296	0.114	1.934	-0.632	-0.816	-0.305
CLK4	-0.196	0.08	1.918	-0.704	-0.846	-0.252
CLOCK	-0.471	0.467	1.847	-0.715	-0.58	-0.548
CLPX	-0.313	0.061	1.976	-0.62	-0.581	-0.522
CLSPN	-0.433	-0.071	2.004	-0.537	-0.341	-0.622
CLTC	-0.361	0.552	1.779	-0.659	-0.425	-0.886
CMPK1	-0.134	0.338	1.743	-0.901	-1.008	-0.038
CMTM6	-0.346	0.514	1.802	-0.801	-0.438	-0.731
CMYA5	-0.784	-0.214	1.851	-0.492	0.371	-0.732
CNKSR2	-0.229	0.402	1.82	-0.87	-0.766	-0.357
CNOT6	-0.441	-0.092	2.003	-0.46	-0.328	-0.682
CNOT6L	-0.333	0.162	1.919	-0.822	-0.267	-0.659
CNTLN	-0.403	0.751	1.689	-0.814	-0.683	-0.541
CNTN1	-0.391	0.457	1.824	-0.725	-0.814	-0.351
CNTNAP2	-0.664	0.199	1.941	-0.468	-0.393	-0.615
CNTRL	-0.433	0.191	1.948	-0.642	-0.514	-0.55
COBLL1	-0.418	0.244	1.923	-0.49	-0.493	-0.765
COG6	-0.343	0.967	1.53	-0.79	-0.841	-0.523
COL11A1	-0.323	-0.801	1.969	-0.443	0.021	-0.424
COL12A1	-0.424	-0.525	1.98	-0.463	0.068	-0.636
COL21A1	-0.074	0.11	1.872	-0.72	-0.949	-0.24
COL25A1	-0.46	-0.04	1.998	-0.595	-0.582	-0.322
COL3A1	0.288	0.297	0.243	0.393	0.78	-2.002
COL4A3BP	-0.414	0.281	1.917	-0.678	-0.513	-0.592
COL4A4	-0.743	-0.963	-0.129	-0.285	0.292	1.827
COMMD10	0.008	1.487	0.668	-1.114	-1.05	0.001
COMMD8	-0.069	0.711	1.344	-1.254	-1.016	0.284
COPB1	-0.376	1.023	1.485	-0.92	-0.722	-0.49
COPS2	0.125	0.646	1.078	-1.151	-1.307	0.609
COQ10B	-0.581	0.189	1.884	-0.489	-0.093	-0.911
COX10-AS1	-0.668	0.452	1.832	-0.818	-0.34	-0.458
CP	-0.189	0.808	1.507	-1.005	-1.009	-0.112
CPD	-0.292	-0.025	1.989	-0.687	-0.489	-0.497
CPEB2	-0.507	-0.133	2.022	-0.459	-0.439	-0.483
CPEB4	-0.467	0.809	1.662	-0.802	-0.587	-0.615
CPNE3	-0.29	1.128	1.399	-0.846	-0.658	-0.733
CPNE8	-0.111	0.855	1.496	-0.839	-1.109	-0.292
CPSF2	-0.432	0.542	1.801	-0.771	-0.445	-0.695
CRBN	-0.314	1.312	1.183	-0.909	-0.904	-0.369
CREB1	-0.42	0.214	1.941	-0.585	-0.638	-0.512
CREB5	-0.535	-0.149	1.995	-0.72	-0.196	-0.395
CREBRF	-0.318	0.837	1.61	-0.793	-0.876	-0.458
CREBZF	-0.337	-0.203	2.021	-0.358	-0.515	-0.607
CRIM1	-0.424	-0.291	2.021	-0.365	-0.279	-0.662
CRISPLD1	-0.3	0.269	1.909	-0.633	-0.713	-0.532
CRNDE	-0.414	0.063	1.892	-0.825	-0.751	0.035
CRNKL1	-0.423	0.641	1.734	-0.903	-0.665	-0.383
CROCCP3	-0.488	-0.56	2.01	-0.062	-0.453	-0.447
CRYBG3	-0.423	-0.017	1.999	-0.599	-0.538	-0.422
CRYBG3	-0.39	-0.14	2.006	-0.642	-0.563	-0.271
CRYZ	-0.291	0.294	1.807	-0.914	-0.852	-0.044
CSDE1	-0.41	0.258	1.877	-0.901	-0.197	-0.627
CSE1L	-0.24	0.42	1.717	-0.998	-0.907	0.008
CSGALNACT2	-0.476	0.391	1.881	-0.556	-0.588	-0.653
CSNK1G3	-0.301	0.167	1.916	-0.718	-0.785	-0.279
CSPP1	-0.425	0.479	1.838	-0.708	-0.666	-0.518
CSRNP3	-0.374	0.857	1.566	-0.715	-1.037	-0.297
CSTF3	-0.499	1.118	1.374	-0.827	-0.229	-0.937
CTA-445C9.14	-0.548	-0.304	2.033	-0.343	-0.458	-0.38
CTB-13H5.1	0.235	0.82	0.749	-1.352	-1.17	0.718
CTB-89H12.4	-0.505	-0.061	2.008	-0.574	-0.401	-0.468
CTC-260E6.6	-0.497	0.059	1.985	-0.554	-0.567	-0.426
CTC-359D24.3	-0.585	-0.752	1.817	0.328	0.018	-0.826
CTC-428G20.3	-0.348	0.507	1.807	-0.716	-0.804	-0.445
CTC-438O3.1	-0.227	0.564	1.719	-0.912	-0.881	-0.262
CTC-462L7.1	-0.504	0.31	1.903	-0.637	-0.693	-0.379
CTC-534A2.2	-0.102	1.081	1.291	-1.136	-0.898	-0.237
CTD-2058B24.2	-0.354	0.061	1.966	-0.431	-0.462	-0.779
CTD-2142D14.1	-0.813	-0.265	1.459	-0.723	-0.711	1.054
CTD-2286N8.2	-0.441	-0.073	2.01	-0.408	-0.498	-0.589
CTD-2334D19.1	-0.365	0.745	1.688	-0.718	-0.807	-0.542
CTD-2349P21.9	-0.365	-0.668	1.984	0.027	-0.448	-0.53
CTD-2528L19.6	-0.193	-0.699	2.005	-0.522	-0.232	-0.359
CTD-2547E10.2	-0.636	-0.944	1.712	0.389	0.232	-0.752
CTD-2561J22.2	-0.321	0.184	1.929	-0.755	-0.65	-0.386
CTD-2616J11.4	0.037	0.441	-0.472	-0.996	-0.75	1.74
CTD-3092A11.2	-0.445	-0.161	1.979	-0.273	-0.252	-0.848
CTD-3099C6.9	-0.499	-0.622	2.003	-0.108	-0.241	-0.532
CTDSPL2	-0.354	0.911	1.569	-0.763	-0.87	-0.492
CTHRC1	-0.401	-0.463	1.797	-0.825	0.541	-0.65
CTNNAL1	-0.128	0.784	1.46	-1.12	-0.991	-0.004
CTR9	-0.335	0.673	1.725	-0.84	-0.656	-0.567
CTTNBP2NL	-0.425	0.382	1.864	-0.535	-0.435	-0.851
CUL2	-0.329	0.771	1.672	-0.683	-0.643	-0.788
CUL3	-0.177	0.348	1.85	-0.815	-0.731	-0.475
CUL4B	-0.24	0.79	1.645	-0.713	-0.79	-0.692
CUL5	-0.227	0.36	1.775	-0.782	-1.023	-0.102
CWC22	-0.101	0.8	1.412	-0.976	-1.184	0.05
CWC27	-0.118	0.289	1.658	-1.068	-0.983	0.22
CWF19L2	-0.358	0.389	1.755	-0.946	-0.863	0.023
CXADR	-0.45	0.297	1.916	-0.622	-0.588	-0.553
CXorf23	-0.365	0.202	1.93	-0.687	-0.688	-0.392
CXorf57	-0.383	0.669	1.742	-0.712	-0.65	-0.665
CXXC4	-0.479	-0.021	2.004	-0.503	-0.482	-0.518
CYB5R4	-0.114	0.775	1.393	-1.237	-0.947	0.131
CYCS	-0.109	0.512	1.617	-1.031	-1.023	0.035
CYP1B1	-0.171	-0.216	1.995	-0.694	-0.31	-0.604
CYP4V2	-0.174	-0.123	1.882	-0.602	0.042	-1.024
DAAM1	-0.397	0.59	1.775	-0.752	-0.744	-0.472
DACH1	-0.409	-0.086	2.004	-0.408	-0.686	-0.415
DARS	-0.482	1.189	1.371	-0.761	-0.544	-0.773
DAZL	-0.092	0.79	1.594	-0.57	-0.959	-0.763
DBF4	-0.155	0.607	1.636	-0.935	-1.019	-0.135
DBT	-0.56	0.519	1.799	-0.699	-0.271	-0.787
DCAF13	0.08	0.259	1.431	-1.248	-1.031	0.509
DCAF17	-0.381	0.781	1.671	-0.806	-0.626	-0.64
DCBLD2	-0.347	0.168	1.943	-0.621	-0.433	-0.709
DCC	-0.398	-0.555	1.988	-0.505	0.038	-0.569
DCDC2	-0.278	0.236	1.919	-0.674	-0.644	-0.56
DCK	-0.187	0.904	1.554	-0.827	-0.786	-0.658
DCLRE1A	-0.389	1.088	1.446	-0.841	-0.744	-0.559
DCP2	-0.405	0.333	1.884	-0.744	-0.694	-0.375
DCTN6	-0.42	0.35	1.862	-0.732	-0.792	-0.267
DCUN1D1	-0.126	0.849	1.416	-0.858	-1.233	-0.048
DCUN1D4	-0.226	0.491	1.745	-0.765	-1.011	-0.235
DCX	-0.376	0.156	1.83	-0.26	-0.172	-1.179
DDAH1	-0.348	0.172	1.949	-0.64	-0.562	-0.571
DDHD1	-0.334	0.105	1.959	-0.502	-0.481	-0.747
DDHD2	-0.524	0.115	1.916	-0.259	-0.312	-0.935
DDI2	-0.472	-0.24	2.004	-0.684	-0.143	-0.465
DDX1	-0.389	0.272	1.86	-1.025	-0.422	-0.296
DDX18	-0.366	0.735	1.688	-0.854	-0.717	-0.485
DDX21	-0.471	0.421	1.868	-0.687	-0.578	-0.554
DDX26B	-0.46	0.823	1.648	-0.582	-0.581	-0.848
DDX3X	-0.415	0.392	1.875	-0.707	-0.615	-0.53
DDX46	-0.464	0.017	1.99	-0.645	-0.499	-0.399
DDX50	-0.369	0.661	1.712	-0.963	-0.634	-0.407
DDX58	-0.381	0.608	1.759	-0.889	-0.566	-0.53
DDX60	-0.39	0.645	1.716	-0.798	-0.87	-0.303
DDX60L	-0.392	0.3	1.911	-0.647	-0.591	-0.58
DEK	-0.137	0.176	1.774	-0.881	-1.011	0.079
DENND1B	-0.467	0.77	1.687	-0.717	-0.539	-0.734
DENND4A	-0.395	0.599	1.774	-0.773	-0.693	-0.512
DENND4C	-0.496	0.691	1.733	-0.72	-0.495	-0.714
DENND5B	-0.467	-0.346	2.02	-0.555	-0.149	-0.501
DEPDC1	-0.235	0.378	1.776	-0.853	-0.952	-0.114
DEPDC1B	-0.278	1.089	1.433	-0.783	-0.728	-0.734
DEPDC7	-0.179	0.543	1.773	-0.751	-0.737	-0.649
DFNB59	-0.363	-0.26	2.031	-0.567	-0.428	-0.413
DGKE	-0.423	0.222	1.937	-0.549	-0.505	-0.681
DGKH	-0.437	-0.384	1.999	-0.183	-0.236	-0.758
DHX15	-0.314	0.999	1.51	-0.731	-0.635	-0.829
DHX29	-0.276	0.56	1.743	-0.802	-0.911	-0.314
DHX36	-0.37	0.217	1.935	-0.66	-0.618	-0.503
DHX40	-0.424	0.653	1.727	-0.819	-0.354	-0.784
DIAPH2	-0.182	0.859	1.373	-1.287	-0.827	0.063
DIAPH3	-0.402	0.863	1.616	-0.594	-0.619	-0.865
DICER1	-0.453	0.011	1.994	-0.611	-0.493	-0.448
DIS3	-0.322	0.415	1.805	-0.804	-0.881	-0.212
DLD	-0.275	0.376	1.796	-0.897	-0.855	-0.145
DLEU2	0.152	1.423	0.724	-1.107	-1.091	-0.101
DLG1	-0.342	0.465	1.818	-0.848	-0.697	-0.396
DLGAP5	-0.26	0.707	1.621	-0.981	-0.897	-0.19
DLL1	-0.006	-0.812	1.958	-0.596	-0.319	-0.224
DMC1	-0.589	-0.055	1.882	-0.19	-0.014	-1.035
DMD	-0.514	0.294	1.916	-0.675	-0.526	-0.495
DMRTA1	-0.282	-0.053	1.984	-0.727	-0.581	-0.341
DMTF1	-0.458	0.483	1.841	-0.628	-0.562	-0.676
DMXL1	-0.461	0.324	1.904	-0.605	-0.671	-0.491
DMXL2	-0.485	0.223	1.942	-0.604	-0.571	-0.505
DNA2	-0.294	1.046	1.466	-0.759	-0.849	-0.61
DNAH14	-0.229	1.107	1.375	-0.984	-0.809	-0.46
DNAH5	-0.475	-0.156	1.993	-0.691	-0.141	-0.529
DNAJB14	-0.153	0.439	1.672	-0.836	-1.136	0.014
DNAJB4	-0.014	0.692	1.434	-1.057	-1.156	0.1
DNAJB9	-0.148	0.106	1.921	-0.72	-0.785	-0.373
DNAJC10	-0.305	0.489	1.79	-0.847	-0.797	-0.33
DNAJC13	-0.447	0.215	1.94	-0.683	-0.518	-0.506
DNAJC2	0.073	0.24	1.383	-1.11	-1.193	0.606
DNAJC21	-0.418	-0.03	2.004	-0.546	-0.533	-0.476
DNAJC24	-0.132	-0.015	1.872	-0.918	-0.796	-0.011
DNAJC27	-0.335	0.2	1.826	-0.314	-0.205	-1.171
DNAJC3	-0.465	0.787	1.656	-0.626	-0.433	-0.918
DNAJC6	-0.568	-0.281	1.944	0.134	-0.459	-0.77
DNAL1	-0.346	0.287	1.872	-0.951	-0.527	-0.336
DNM1L	-0.445	0.343	1.878	-0.813	-0.357	-0.608
DNTTIP2	-0.064	0.158	1.526	-1.046	-1.119	0.546
DOCK10	-0.416	0.572	1.726	-0.593	-0.232	-1.057
DOCK11	-0.292	0.501	1.797	-0.702	-0.868	-0.436
DOCK4	-0.451	0.293	1.902	-0.645	-0.358	-0.741
DOCK5	-0.556	-0.253	1.971	-0.465	0.029	-0.726
DOCK7	-0.422	0.546	1.809	-0.709	-0.586	-0.638
DOCK9	-0.341	-0.086	1.951	-0.591	-0.088	-0.845
DOPEY1	-0.454	0.513	1.827	-0.693	-0.641	-0.551
DPM1	0.079	0.796	1.391	-1.012	-1.181	-0.072
DPP10	-0.312	-0.099	1.898	-0.862	-0.732	0.106
DPP8	-0.476	0.004	1.997	-0.575	-0.437	-0.514
DPPA3	-0.241	1.109	1.02	-1.439	-0.725	0.276
DPY19L1	-0.403	0.278	1.903	-0.514	-0.437	-0.827
DPY19L2	-0.47	0.168	1.947	-0.725	-0.392	-0.528
DPY19L2P4	-0.433	0.841	1.624	-0.437	-0.74	-0.854
DPY19L3	-0.469	-0.093	2.01	-0.625	-0.42	-0.404
DPY19L4	-0.227	0.49	1.755	-0.805	-0.956	-0.256
DR1	-0.254	0.371	1.838	-0.857	-0.754	-0.344
DSC2	-0.367	0.14	1.953	-0.627	-0.423	-0.677
DSC3	-0.339	0.101	1.947	-0.568	-0.334	-0.806
DSCC1	-0.06	0.327	1.769	-0.929	-0.929	-0.178
DSG2	-0.517	0.426	1.846	-0.512	-0.386	-0.857
DSP	-0.367	-0.546	1.997	-0.486	-0.014	-0.584
DST	-0.435	-0.207	2.029	-0.542	-0.444	-0.401
DTWD1	-0.122	0.82	1.494	-0.992	-1.034	-0.166
DTWD2	-0.692	-0.11	1.999	-0.395	-0.537	-0.265
DUS4L	-0.025	-0.21	1.87	-0.947	-0.747	0.059
DYNC1LI2	-0.462	0.046	1.973	-0.502	-0.321	-0.733
DYNC2H1	-0.39	0.162	1.95	-0.643	-0.648	-0.432
DYNC2LI1	-0.061	0.621	1.3	-1.325	-0.983	0.448
DYNLT3	0.01	0.315	1.508	-0.99	-1.225	0.383
DYRK2	-0.434	-0.125	2.012	-0.632	-0.34	-0.481
DZIP1	-0.452	0.313	1.899	-0.459	-0.519	-0.781
DZIP3	-0.447	0.789	1.674	-0.764	-0.69	-0.562
E2F8	-0.523	-0.659	1.866	0.149	0.053	-0.887
EBLN2	-0.5	0.292	1.91	-0.679	-0.635	-0.39
ECHDC1	-0.344	-0.025	1.728	-0.984	-0.842	0.468
ECT2	-0.296	1.057	1.45	-0.784	-0.888	-0.538
EDEM3	-0.39	0.238	1.914	-0.725	-0.7	-0.338
EDIL3	-0.452	1.204	1.361	-0.742	-0.652	-0.719
EDNRA	-0.385	0.88	1.595	-0.658	-0.521	-0.911
EEA1	-0.23	0.932	1.405	-0.886	-1.147	-0.074
EEF1E1	0.109	0.785	1.133	-1.194	-1.227	0.393
EFCAB6	-0.619	1.183	1.336	-0.574	-0.33	-0.996
EFCAB7	0.065	0.532	1.479	-1.047	-1.185	0.155
EFEMP1	0.225	0.941	0.615	0.303	-0.199	-1.885
EFHC2	-0.336	1.473	1.032	-0.496	-0.897	-0.776
EFR3A	-0.367	0.598	1.772	-0.794	-0.544	-0.666
EHBP1	-0.449	0.552	1.796	-0.675	-0.429	-0.794
EIF1AX	-0.274	0.586	1.712	-0.916	-0.868	-0.239
EIF1AXP1	-0.213	0.3	1.779	-1.034	-0.795	-0.036
EIF2A	-0.356	0.638	1.723	-0.886	-0.766	-0.353
EIF2AK2	-0.386	-0.16	2.018	-0.472	-0.372	-0.627
EIF2S2P4	-0.197	0.654	1.598	-0.944	-1.042	-0.069
EIF3A	-0.355	-0.187	2.018	-0.634	-0.486	-0.355
EIF3E	0.187	0.683	0.83	-1.333	-1.175	0.807
EIF3J	-0.252	0.363	1.828	-0.864	-0.803	-0.272
EIF4E	-0.111	0.589	1.582	-0.978	-1.087	0.006
EIF4G3	-0.37	-0.272	1.982	-0.473	-0.074	-0.794
EIF5	-0.328	0.743	1.69	-0.758	-0.71	-0.637
EIF5A2	-0.556	0.604	1.723	-1.044	-0.315	-0.411
EIF5B	-0.405	0.348	1.882	-0.788	-0.603	-0.434
ELAVL2	-0.282	0.518	1.76	-0.924	-0.786	-0.287
ELF2	-0.349	0.935	1.501	-0.385	-0.574	-1.128
ELK3	-0.442	-0.105	2.006	-0.667	-0.464	-0.328
ELK4	-0.488	-0.336	2.033	-0.529	-0.303	-0.378
ELL2	-0.352	0.759	1.679	-0.75	-0.548	-0.788
ELMOD2	-0.155	0.359	1.731	-0.908	-1.013	-0.014
ELOVL6	-0.426	0.502	1.825	-0.723	-0.485	-0.692
ELOVL7	-0.377	-0.241	2.021	-0.422	-0.324	-0.658
ELTD1	-0.448	0.577	1.743	-1.003	-0.582	-0.288
EMB	-0.32	0.316	1.866	-0.78	-0.788	-0.294
EMC2	0.013	0.197	1.328	-1.218	-1.072	0.751
EML4	-0.404	0.374	1.879	-0.695	-0.488	-0.666
EML5	-0.382	-0.205	2.025	-0.574	-0.497	-0.366
EML6	-0.322	-0.482	1.954	-0.415	0.081	-0.816
ENAH	-0.363	0.121	1.964	-0.616	-0.604	-0.503
ENPEP	-0.401	0.394	1.875	-0.64	-0.664	-0.563
ENPP4	-0.213	0.575	1.715	-0.965	-0.814	-0.299
ENPP5	-0.464	0.227	1.925	-0.735	-0.605	-0.348
EOGT	-0.496	0.044	1.99	-0.551	-0.521	-0.466
EOMES	-0.756	-0.343	1.869	0.278	-0.216	-0.832
EPB41L4A	-1.003	-0.592	1.83	-0.134	0.319	-0.419
EPB41L5	-0.447	0.825	1.636	-0.599	-0.506	-0.91
EPC2	-0.424	0.251	1.925	-0.67	-0.449	-0.633
EPHA7	-0.653	0.394	1.822	-0.939	-0.415	-0.209
EPM2AIP1	-0.455	0.158	1.958	-0.494	-0.512	-0.655
EPRS	-0.429	0.536	1.807	-0.804	-0.559	-0.552
EPS15	-0.397	1.231	1.322	-0.6	-0.708	-0.847
EPS8	-0.286	1.044	1.423	-0.779	-0.377	-1.026
EPT1	-0.445	0.531	1.803	-0.756	-0.399	-0.734
ERBB2IP	-0.408	0.172	1.947	-0.614	-0.677	-0.42
ERC2	-0.539	1.004	1.507	-0.61	-0.422	-0.939
ERCC5	-0.399	0.487	1.812	-0.61	-0.402	-0.888
ERCC6L	-0.388	0.336	1.88	-0.795	-0.653	-0.38
ERCC6L2	-0.396	0.469	1.841	-0.703	-0.651	-0.561
ERGIC2	0.012	0.241	1.393	-1.172	-1.107	0.633
ERI1	-0.327	0.647	1.739	-0.77	-0.762	-0.527
ERI2	-0.207	0.62	1.667	-0.938	-0.933	-0.209
ERO1L	-0.399	0.15	1.934	-0.469	-0.364	-0.852
ERO1LB	-0.206	0.402	1.843	-0.692	-0.593	-0.754
ERV3-1	-0.46	-0.084	1.962	-0.261	-0.268	-0.889
ESCO1	0.117	0.892	1.013	-0.957	-1.449	0.386
ESCO2	-0.451	0.264	1.906	-0.765	-0.64	-0.313
ESF1	0.178	0.211	1.221	-1	-1.365	0.755
ETAA1	0.136	0.605	1.258	-1.039	-1.343	0.383
ETNK1	-0.329	0.934	1.534	-0.777	-0.939	-0.424
ETV1	-0.383	1.107	1.438	-0.751	-0.677	-0.734
ETV3	-0.528	-0.557	1.949	-0.121	0.028	-0.771
EVI5	-0.415	0.597	1.783	-0.653	-0.596	-0.715
EXOC1	-0.358	0.886	1.587	-0.807	-0.48	-0.829
EXOC5	-0.338	0.336	1.837	-0.786	-0.865	-0.183
EXOC6	-0.252	1.136	1.294	-1.019	-0.94	-0.219
EXOC8	-0.386	0.066	1.977	-0.454	-0.531	-0.671
EXOSC9	-0.37	0.462	1.839	-0.602	-0.765	-0.565
EXPH5	-0.505	0.127	1.969	-0.603	-0.527	-0.461
EXTL2	-0.304	1.187	1.345	-0.833	-0.597	-0.798
F2RL2	-0.616	-0.215	2.005	-0.544	-0.144	-0.485
F8	-0.593	0.91	1.577	-0.331	-0.799	-0.764
FAM102B	-0.412	0.014	1.983	-0.663	-0.586	-0.336
FAM105A	-0.46	0.519	1.818	-0.694	-0.464	-0.719
FAM107B	-0.366	0.79	1.661	-0.542	-0.78	-0.762
FAM111A	-0.471	0.356	1.879	-0.769	-0.363	-0.632
FAM111B	-0.474	0.677	1.565	-0.952	-0.968	0.152
FAM115A	-0.386	0.148	1.917	-0.335	-0.409	-0.935
FAM115B	-0.252	-0.371	1.985	-0.588	-0.059	-0.715
FAM117B	-0.473	-0.321	2.037	-0.415	-0.343	-0.484
FAM122B	-0.409	-0.067	1.997	-0.603	-0.291	-0.626
FAM126A	-0.505	0.706	1.703	-0.873	-0.68	-0.351
FAM126B	-0.429	-0.087	2.01	-0.551	-0.374	-0.569
FAM133A	-0.062	0.746	1.499	-1.044	-1.046	-0.093
FAM133B	-0.33	0.277	1.898	-0.773	-0.675	-0.396
FAM135A	-0.364	0.649	1.73	-0.801	-0.799	-0.415
FAM13A	-0.425	0.651	1.696	-0.585	-0.292	-1.044
FAM13B	-0.391	0.204	1.941	-0.664	-0.59	-0.5
FAM155A	-0.337	-0.594	1.971	-0.432	0.067	-0.675
FAM159B	-1.261	-1.012	0.028	0.238	0.605	1.401
FAM160B1	-0.43	0.271	1.924	-0.553	-0.581	-0.631
FAM161A	-0.454	0.265	1.926	-0.596	-0.515	-0.626
FAM169A	-0.321	0.034	1.959	-0.715	-0.687	-0.271
FAM171B	-0.21	0.97	1.452	-0.864	-1.028	-0.322
FAM172A	-0.433	0.454	1.852	-0.558	-0.672	-0.643
FAM175A	-0.458	0.45	1.838	-0.846	-0.57	-0.413
FAM175B	-0.356	1.063	1.447	-0.672	-0.518	-0.964
FAM177A1	-0.635	0.262	1.913	-0.736	-0.438	-0.366
FAM178A	-0.44	0.412	1.868	-0.716	-0.515	-0.609
FAM179B	-0.326	0.617	1.762	-0.667	-0.667	-0.719
FAM184A	-0.366	-0.051	1.996	-0.621	-0.61	-0.348
FAM19A2	-0.362	0.47	1.8	-0.874	-0.748	-0.286
FAM200A	-0.414	0.606	1.726	-0.474	-0.392	-1.052
FAM200B	-0.459	0.26	1.874	-0.774	-0.771	-0.129
FAM206A	-0.287	0.369	1.831	-0.974	-0.61	-0.328
FAM208A	-0.377	0.283	1.914	-0.678	-0.562	-0.581
FAM208B	-0.389	0.287	1.914	-0.666	-0.619	-0.526
FAM214A	-0.345	0.615	1.749	-0.635	-0.898	-0.485
FAM217B	-0.494	0.873	1.605	-0.767	-0.397	-0.819
FAM218A	-0.226	0.88	1.478	-0.654	-1.223	-0.256
FAM35A	-0.14	0.8	1.54	-0.869	-1.07	-0.261
FAM35DP	-0.538	-0.574	1.944	-0.682	-0.326	0.176
FAM3C	-0.422	0.236	1.934	-0.619	-0.617	-0.512
FAM3C2	-0.269	0.079	1.966	-0.617	-0.609	-0.55
FAM45A	-0.373	0.447	1.843	-0.787	-0.629	-0.501
FAM46A	-0.227	0.541	1.686	-0.298	-0.478	-1.223
FAM63B	-0.433	-0.226	2.03	-0.554	-0.403	-0.414
FAM69A	-0.371	0.34	1.876	-0.584	-0.843	-0.419
FAM73A	-0.539	0.349	1.895	-0.689	-0.468	-0.549
FAM76B	-0.304	0.21	1.88	-0.738	-0.868	-0.179
FAM83B	-0.465	0.368	1.886	-0.677	-0.466	-0.645
FAM84B	-0.286	-0.592	1.993	-0.394	-0.059	-0.663
FAM8A1	-0.173	0.141	1.923	-0.811	-0.617	-0.463
FAM91A1	-0.402	0.407	1.857	-0.746	-0.709	-0.407
FAM92A1	-0.206	1.54	0.719	-1.097	-0.929	-0.026
FAM98B	-0.398	0.23	1.93	-0.704	-0.585	-0.474
FANCB	-0.176	0.595	1.618	-0.897	-1.091	-0.049
FANCI	-0.471	0.562	1.741	-0.685	-0.185	-0.963
FANCM	-0.085	0.455	1.56	-0.913	-1.216	0.199
FAR1	-0.376	0.106	1.951	-0.664	-0.712	-0.306
FAS	-0.238	1.272	1.248	-0.904	-0.713	-0.665
FASTKD1	-0.09	1.377	1.087	-0.876	-0.859	-0.638
FASTKD2	-0.162	0.528	1.686	-0.995	-0.919	-0.138
FAT1	-0.383	-0.468	1.987	-0.43	0.003	-0.709
FAT3	-0.319	-0.428	1.955	-0.699	0.117	-0.626
FAT4	-0.481	-0.184	2.024	-0.562	-0.347	-0.451
FBXL13	-0.62	0.387	1.802	-0.857	-0.016	-0.696
FBXL3	-0.394	0.115	1.969	-0.607	-0.515	-0.567
FBXO11	-0.383	-0.111	1.992	-0.352	-0.356	-0.79
FBXO3	-0.411	0.52	1.796	-0.889	-0.391	-0.625
FBXO30	-0.384	0.296	1.909	-0.699	-0.585	-0.536
FBXO32	0.161	0.726	0.962	-0.33	0.303	-1.823
FBXO45	-0.276	0.055	1.962	-0.641	-0.381	-0.719
FBXO48	-0.157	-0.353	2.009	-0.686	-0.487	-0.325
FBXO5	-0.089	0.885	1.498	-0.721	-1.107	-0.466
FBXW7	-0.359	-0.268	2.01	-0.385	-0.26	-0.737
FCF1P2	-0.597	0.629	1.59	-0.587	0.13	-1.165
FCHO2	-0.392	1.043	1.485	-0.762	-0.809	-0.565
FEM1B	-0.342	0.381	1.874	-0.699	-0.611	-0.604
FEM1C	-0.397	-0.052	1.995	-0.565	-0.317	-0.664
FER	-0.321	0.438	1.823	-0.826	-0.755	-0.359
FERMT2	-0.464	0.74	1.691	-0.84	-0.433	-0.694
FGD4	-0.446	-0.02	2.003	-0.546	-0.481	-0.511
FGD6	-0.501	0.09	1.98	-0.564	-0.496	-0.508
FGF2	-0.395	-0.159	2.02	-0.578	-0.51	-0.378
FGFR1OP	-0.426	0.406	1.872	-0.679	-0.56	-0.613
FGFR1OP2	-0.236	0.535	1.672	-0.877	-1.045	-0.049
FIGN	-0.432	-0.109	2.015	-0.513	-0.386	-0.575
FIGNL1	-0.402	0.755	1.685	-0.843	-0.643	-0.552
FILIP1	-0.618	0.577	1.782	-0.836	-0.44	-0.465
FILIP1L	-0.476	-0.26	2.032	-0.341	-0.443	-0.513
FKBP14	-0.633	0.467	1.823	-0.484	-0.325	-0.848
FKBP7	-0.289	1.177	1.35	-0.856	-0.799	-0.582
FKTN	-0.43	0.573	1.789	-0.803	-0.619	-0.509
FLRT2	-0.317	-0.591	1.968	-0.423	0.066	-0.703
FLRT3	-0.379	0.839	1.487	-0.916	0.018	-1.049
FLT1	-0.449	-0.205	1.996	-0.452	-0.152	-0.737
FMN1	-0.424	-0.06	1.992	-0.534	-0.275	-0.698
FMNL2	-0.516	0.484	1.83	-0.695	-0.382	-0.721
FMR1	-0.482	0.034	1.991	-0.514	-0.445	-0.584
FNBP1L	-0.451	0.579	1.793	-0.724	-0.654	-0.543
FNBP4	-0.471	0.002	1.968	-0.253	-0.443	-0.803
FNDC3A	-0.443	0.512	1.826	-0.643	-0.566	-0.688
FNDC3B	-0.408	-0.135	2.003	-0.711	-0.282	-0.468
FNIP1	-0.426	0.559	1.801	-0.585	-0.609	-0.74
FNIP2	-0.372	0.401	1.834	-0.568	-0.349	-0.946
FNTA	-0.355	0.861	1.578	-0.487	-0.543	-1.055
FOSL2	-0.719	-1.137	1.374	0.942	0.164	-0.623
FOXN2	-0.271	1.115	1.348	-0.809	-1.049	-0.335
FOXO1	-0.675	-0.639	1.888	0.24	-0.104	-0.71
FOXO3	-0.462	-0.689	1.984	-0.303	0.005	-0.534
FPGT	-0.193	0.967	1.417	-1	-0.99	-0.2
FRA10AC1	-0.389	-0.026	1.919	-1.02	-0.3	-0.185
FREM2	-0.31	-0.378	2.014	-0.391	-0.227	-0.708
FRMD4B	-0.488	0.811	1.659	-0.791	-0.688	-0.503
FRMD6	-0.552	0.12	1.962	-0.333	-0.553	-0.643
FRS2	-0.399	0.326	1.894	-0.721	-0.661	-0.438
FRYL	-0.424	0.388	1.875	-0.751	-0.543	-0.544
FSBP	-0.323	0.119	1.944	-0.661	-0.746	-0.333
FSD1L	-0.267	0.409	1.8	-0.693	-0.985	-0.264
FSIP1	-0.398	0.119	1.95	-0.81	-0.428	-0.433
FST	-0.759	-0.75	1.675	0.707	-0.14	-0.733
FTSJD1	-0.393	0.309	1.877	-0.824	-0.681	-0.287
FUBP3	-0.329	0.094	1.965	-0.572	-0.47	-0.688
FUT9	-0.397	0.108	1.958	-0.712	-0.609	-0.348
FXR1	-0.395	0.399	1.866	-0.778	-0.594	-0.498
FYTTD1	-0.446	0.755	1.649	-0.91	-0.784	-0.263
FZD1	-0.529	-0.945	1.579	0.569	0.289	-0.963
FZD10	-0.752	-0.537	1.86	0.065	0.171	-0.807
FZD3	-0.411	0.363	1.886	-0.627	-0.517	-0.694
FZD5	-0.836	-0.954	1.745	0.467	-0.35	-0.072
FZD6	-0.406	0.138	1.96	-0.674	-0.547	-0.471
G2E3	-0.192	0.706	1.47	-1.016	-1.118	0.151
G3BP1	-0.347	0.555	1.761	-0.609	-0.384	-0.975
G3BP2	-0.29	0.85	1.613	-0.778	-0.783	-0.612
GAB1	-0.476	0.05	1.976	-0.398	-0.426	-0.726
GABPA	-0.379	0.236	1.888	-0.763	-0.783	-0.199
GABPB1	-0.351	1.005	1.452	-0.349	-0.663	-1.094
GAD1	-0.803	0.187	1.848	0	-0.344	-0.887
GADD45G	0.5	1.602	0.081	-0.944	-1.129	-0.111
GALNT1	-0.291	0.12	1.894	-0.793	-0.82	-0.111
GALNT13	-0.352	0.096	1.956	-0.729	-0.348	-0.623
GALNT3	-0.239	0.132	1.945	-0.615	-0.705	-0.518
GALNT7	-0.37	0.529	1.812	-0.69	-0.673	-0.608
GAN	-0.458	0.417	1.861	-0.67	-0.43	-0.72
GAS2L3	-0.285	0.327	1.868	-0.669	-0.395	-0.847
GATA2	-0.649	-0.642	1.76	0.654	-0.491	-0.632
GATA3	-0.668	-0.635	1.921	0.259	-0.366	-0.51
GBAS	-0.435	0.879	1.571	-0.356	-0.643	-1.015
GBX2	1.773	-0.178	-0.002	-1.33	-0.241	-0.023
GCA	-0.205	0.051	1.828	-0.913	-0.877	0.115
GCC2	-0.389	0.892	1.585	-0.803	-0.83	-0.454
GCFC2	-0.119	0.26	1.673	-1.009	-1.025	0.22
GCLC	-0.476	0.121	1.911	-0.42	-0.189	-0.947
GCLM	-0.366	0.354	1.888	-0.605	-0.586	-0.685
GCNT4	-0.39	0.876	1.606	-0.772	-0.79	-0.53
GDAP1	-0.371	0.422	1.829	-0.944	-0.399	-0.537
GEN1	-0.372	0.466	1.835	-0.72	-0.728	-0.48
GFM1	-0.377	0.399	1.865	-0.783	-0.562	-0.542
GFPT1	-0.502	0.188	1.948	-0.681	-0.459	-0.494
GGNBP2	-0.417	-0.428	2.014	-0.531	-0.092	-0.546
GGPS1	-0.392	0.17	1.901	-0.959	-0.475	-0.244
GIN1	0.055	0.875	0.947	-1.216	-1.235	0.574
GINM1	-0.605	-0.128	1.966	-0.056	-0.424	-0.754
GIPC2	-0.057	0.485	1.512	-1.018	-1.174	0.251
GJA1	-0.392	0.493	1.83	-0.667	-0.555	-0.709
GJD2	-0.656	-0.386	1.947	0.169	-0.424	-0.649
GK	-0.347	0.817	1.644	-0.793	-0.719	-0.601
GK5	-0.433	-0.21	2.021	-0.636	-0.336	-0.407
GLCCI1	-0.405	-0.273	2.027	-0.588	-0.472	-0.289
GLIPR1	0.329	1.032	0.421	-0.217	0.308	-1.873
GLMN	-0.163	0.771	1.453	-1.137	-0.986	0.063
GLS	-0.337	0.278	1.883	-0.746	-0.79	-0.287
GMCL1	-0.415	0.191	1.94	-0.746	-0.462	-0.507
GMFB	0.053	0.652	1.276	-1.043	-1.311	0.373
GNA13	-0.331	0.43	1.845	-0.746	-0.717	-0.481
GNAI1	-0.33	0.182	1.935	-0.749	-0.597	-0.442
GNAI3	-0.27	0.368	1.83	-0.89	-0.758	-0.28
GNAQ	-0.246	0.131	1.926	-0.76	-0.73	-0.321
GNB4	-0.382	-0.21	2.018	-0.671	-0.34	-0.415
GNG12	-0.493	1.102	1.435	-0.855	-0.441	-0.748
GNG2	-0.395	1.167	1.385	-0.809	-0.694	-0.654
GNL2	-0.499	0.143	1.909	-0.951	-0.304	-0.299
GNL3	-0.267	0.583	1.749	-0.79	-0.855	-0.42
GNPDA2	-0.187	0.5	1.757	-0.927	-0.812	-0.331
GNPTAB	-0.392	0.444	1.851	-0.727	-0.616	-0.56
GOLGA4	-0.078	0.141	1.665	-0.939	-1.105	0.316
GOLGA5	-0.394	1.309	1.25	-0.768	-0.645	-0.751
GOLGA6L9	-0.429	0.283	1.917	-0.516	-0.574	-0.681
GOLGA8A	-0.432	-0.762	1.974	-0.467	0.03	-0.343
GOLGA8B	-0.476	-0.675	1.982	-0.536	0.022	-0.317
GOLGB1	-0.342	0.165	1.929	-0.759	-0.677	-0.316
GOLIM4	-0.447	-0.079	2.014	-0.477	-0.476	-0.534
GOLT1B	-0.252	0.552	1.699	-0.882	-0.973	-0.145
GOPC	-0.414	0.13	1.955	-0.732	-0.554	-0.384
GORAB	-0.479	0.812	1.665	-0.607	-0.696	-0.695
GPAM	-0.475	0.757	1.69	-0.749	-0.479	-0.744
GPATCH11	-0.403	1.364	1.158	-0.936	-0.421	-0.763
GPATCH2	-0.323	0.896	1.581	-0.874	-0.714	-0.566
GPATCH2L	-0.52	0.058	1.958	-0.52	-0.216	-0.759
GPBP1	-0.318	0.495	1.791	-0.823	-0.809	-0.337
GPC6	-0.787	-0.019	1.411	-1.045	-0.554	0.994
GPCPD1	-0.494	0.328	1.893	-0.781	-0.401	-0.544
GPD2	-0.419	0.696	1.725	-0.8	-0.596	-0.606
GPR1	-0.736	-0.218	1.78	0.544	-0.625	-0.744
GPR126	-0.498	-0.058	1.987	-0.744	-0.416	-0.271
GPR135	-0.441	-0.752	1.989	-0.482	-0.188	-0.126
GPR137C	-0.254	-0.112	1.98	-0.706	-0.67	-0.237
GPR158	-0.58	0.243	1.843	-0.453	-0.053	-0.999
GPR180	-0.114	0.325	1.775	-0.864	-0.983	-0.138
GPR63	-0.453	0.372	1.779	-0.437	-0.127	-1.134
GPR64	-0.53	-0.028	1.939	-0.051	-0.475	-0.856
GPR75	-0.368	-0.643	1.962	-0.152	-0.039	-0.76
GPR98	-0.431	-0.3	2.035	-0.528	-0.342	-0.433
GPRIN3	-0.505	-0.456	2.028	-0.419	-0.466	-0.182
GPSM2	-0.456	0.682	1.734	-0.713	-0.49	-0.756
GPX8	-0.426	0.901	1.563	-1.026	-0.502	-0.51
GRB14	-0.457	0.097	1.974	-0.543	-0.45	-0.622
GREM1	-0.557	-0.36	2.013	-0.099	-0.463	-0.534
GRIA3	-1.124	0.319	1.684	-0.865	-0.164	0.15
GRIA4	-0.324	1.07	1.459	-0.755	-0.699	-0.751
GRID2	-0.375	0.602	1.735	-0.702	-0.315	-0.946
GRIK2	-0.349	0.476	1.817	-0.635	-0.442	-0.867
GRIN2A	-0.438	-0.293	2.029	-0.272	-0.467	-0.559
GRIP1	-0.452	-0.208	1.99	-0.564	-0.082	-0.684
GRPEL2	-0.401	0.703	1.72	-0.615	-0.604	-0.803
GRPR	-0.426	0.003	1.976	-0.78	-0.329	-0.443
GS1-251I9.4	0.103	0.503	1.089	-1.14	-1.301	0.746
GS1-358P8.4	-0.499	0.096	1.966	-0.711	-0.365	-0.487
GS1-465N13.1	-0.383	0.061	1.877	-1.041	-0.024	-0.49
GSKIP	0.006	1.033	1.096	-1.042	-1.271	0.178
GTF2A1	-0.436	0.366	1.888	-0.654	-0.526	-0.638
GTF2F2	-0.144	0.513	1.681	-0.975	-0.964	-0.111
GTF2H2	-0.359	0.671	1.725	-0.878	-0.628	-0.53
GTF2H3	-0.61	0.373	1.812	-0.413	-0.159	-1.004
GTPBP10	-0.355	0.326	1.838	-0.993	-0.594	-0.223
GTPBP8	-0.135	0.094	1.849	-0.928	-0.831	-0.049
GUCY1A2	-0.119	0.177	1.819	-0.504	-1.16	-0.212
GUCY2C	-0.234	0.123	1.753	0.248	-1.004	-0.886
GUF1	-0.426	0.088	1.965	-0.668	-0.336	-0.623
GULP1	-0.211	1.424	1.036	-0.826	-0.992	-0.432
GXYLT1	-0.395	-0.078	2.01	-0.587	-0.517	-0.432
HACE1	-0.375	0.38	1.877	-0.705	-0.613	-0.564
HAS2	-1.179	-0.564	1.754	0.145	-0.381	0.224
HAT1	0.167	0.766	0.976	-1.219	-1.269	0.579
HAUS1	0.092	1.046	1.096	-1.127	-1.191	0.083
HAUS3	-0.383	-0.112	2.006	-0.567	-0.63	-0.314
HAUS6	-0.352	0.372	1.854	-0.741	-0.803	-0.329
HBS1L	-0.255	0.523	1.767	-0.855	-0.828	-0.352
HDAC2	-0.113	0.516	1.705	-0.97	-0.906	-0.233
HDAC9	-0.542	0.853	1.62	-0.661	-0.399	-0.87
HDGFRP3	-0.178	0.248	1.836	-0.85	-0.885	-0.172
HDX	-0.424	1.048	1.451	-0.954	-0.76	-0.361
HEATR1	-0.405	0.733	1.621	-0.61	-0.22	-1.119
HEATR5A	-0.497	0.832	1.593	-0.86	-0.209	-0.86
HECA	-0.368	-0.398	2.036	-0.389	-0.332	-0.548
HECTD1	-0.384	-0.035	1.993	-0.69	-0.516	-0.367
HECTD2	-0.397	0.631	1.736	-0.784	-0.829	-0.358
HEG1	-0.696	-1.012	1.402	1.01	0.009	-0.712
HELB	-0.397	-0.149	1.988	-0.628	-0.142	-0.672
HELLS	-0.366	0.276	1.861	-0.859	-0.75	-0.162
HELQ	-0.247	0.646	1.733	-0.775	-0.671	-0.685
HELZ	-0.465	0.034	1.986	-0.478	-0.415	-0.661
HERC4	-0.449	0.688	1.728	-0.839	-0.582	-0.546
HES1	-0.632	0.431	1.834	-0.838	-0.267	-0.527
HESX1	-0.387	0.472	1.333	-1.346	-0.755	0.684
HFM1	-0.39	1.246	1.289	-0.746	-0.921	-0.478
HHEX	-0.621	-1.069	1.699	0.007	0.532	-0.549
HIBCH	-0.342	0.171	1.935	-0.798	-0.545	-0.421
HIF1A	-0.337	0.211	1.91	-0.665	-0.809	-0.311
HINT3	-0.478	0.034	1.979	-0.723	-0.429	-0.383
HIPK3	-0.401	0.608	1.776	-0.652	-0.706	-0.626
HIVEP1	-0.471	-0.043	2.005	-0.475	-0.421	-0.595
HIVEP2	-0.439	-0.387	2.031	-0.511	-0.221	-0.473
HLTF	-0.251	0.822	1.6	-0.755	-0.962	-0.454
HMCN1	-0.402	-0.066	1.992	-0.65	-0.259	-0.614
HMGA2	-0.438	0.409	1.85	-0.622	-0.362	-0.836
HMGB1	-0.204	0.49	1.692	-1.037	-0.882	-0.059
HMGCS1	-0.283	0.432	1.828	-0.838	-0.432	-0.709
HMGN1P38	-0.539	1.134	1.407	-0.401	-0.806	-0.795
HMGN5	0.249	0.676	0.646	-1.182	-1.332	0.945
HMMR	-0.256	1.275	1.125	-1.086	-0.919	-0.139
HNF4G	-0.443	0.934	1.578	-0.716	-0.759	-0.593
HNMT	-0.244	0.492	1.678	-0.955	-0.985	0.014
HNRNPA2B1	-0.511	0.064	1.949	-0.613	-0.157	-0.732
HNRNPA3	-0.483	0.028	1.953	-0.755	-0.139	-0.603
HNRNPDL	-0.269	0.464	1.799	-0.623	-0.955	-0.417
HNRNPH1	-0.499	0.153	1.947	-0.537	-0.327	-0.737
HNRNPH3	-0.441	0.212	1.907	-0.792	-0.214	-0.672
HNRNPR	-0.334	0.183	1.928	-0.77	-0.643	-0.364
HNRNPU-AS1	-0.418	-0.3	2.037	-0.485	-0.467	-0.367
HOMER1	-0.253	0.049	1.964	-0.724	-0.6	-0.436
HOOK1	-0.302	0.235	1.881	-0.737	-0.85	-0.227
HOOK3	-0.442	0.139	1.961	-0.652	-0.565	-0.442
HPS3	-0.43	0.246	1.889	-0.555	-0.246	-0.904
HRSP12	-0.153	0.636	1.432	-1.248	-0.943	0.274
HS2ST1	-0.398	0.115	1.959	-0.7	-0.601	-0.376
HS6ST2	-0.193	0.613	1.726	-0.728	-0.901	-0.517
HSD17B12	-0.367	0.944	1.562	-0.777	-0.641	-0.721
HSF2	-0.146	0.916	1.5	-0.462	-0.766	-1.043
HSP90AA1	-0.23	1.053	1.402	-1.004	-0.855	-0.366
HSP90B1	-0.351	0.488	1.83	-0.701	-0.634	-0.631
HSPA13	-0.222	1.135	1.3	-0.882	-1.056	-0.275
HSPA4	-0.235	0.538	1.765	-0.93	-0.688	-0.45
HSPA4L	0.12	0.849	1.345	-0.915	-1.266	-0.132
HSPH1	-0.147	0.782	1.629	-0.816	-0.715	-0.733
HTATSF1	-0.383	0.366	1.881	-0.746	-0.538	-0.58
IBTK	-0.433	0.316	1.9	-0.674	-0.681	-0.428
ICA1L	-0.543	0.175	1.952	-0.648	-0.422	-0.515
ICK	-0.407	0.459	1.849	-0.598	-0.631	-0.672
ID2	-0.411	-0.1	1.983	-0.16	-0.633	-0.68
ID4	-0.5	-0.361	2.028	-0.198	-0.475	-0.493
IDE	-0.414	0.594	1.785	-0.682	-0.65	-0.633
IDO1	0.335	1.032	0.434	0.174	-0.079	-1.897
IER3IP1	-0.144	0.103	1.757	-0.916	-1.001	0.2
IFIH1	-0.325	0.674	1.557	-0.272	-0.267	-1.368
IFIT1	0.04	1.552	0.746	-0.686	-0.511	-1.141
IFIT3	-0.51	-0.084	2.01	-0.427	-0.396	-0.594
IFIT5	-0.254	0.736	1.646	-0.856	-0.902	-0.37
IFNAR1	-0.376	-0.176	1.977	-0.516	-0.109	-0.8
IFNGR1	-0.293	0.556	1.78	-0.804	-0.727	-0.513
IFT74	0.04	0.307	1.456	-1.075	-1.19	0.462
IFT80	-0.311	0.428	1.768	-0.835	-0.941	-0.108
IFT81	-0.356	0.342	1.864	-0.804	-0.735	-0.311
IFT88	-0.373	0.249	1.882	-0.768	-0.791	-0.199
IGF2BP3	-0.26	0.64	1.739	-0.691	-0.735	-0.693
IGSF10	-0.366	0.058	1.978	-0.488	-0.513	-0.669
IKBIP	-0.308	0.72	1.651	-0.86	-0.915	-0.288
IKZF2	-0.488	0.967	1.553	-0.771	-0.744	-0.517
IKZF5	-0.441	0.633	1.754	-0.79	-0.717	-0.438
IL1A	0.194	0.878	1.207	-1.04	-1.285	0.045
IL1RAP	-0.421	1.264	1.287	-0.52	-0.769	-0.84
IL6ST	-0.305	0.751	1.672	-0.777	-0.819	-0.523
IMPA1	-0.234	1.06	1.348	-1.035	-0.948	-0.191
IMPACT	-0.405	0.301	1.898	-0.775	-0.615	-0.405
IMPAD1	-0.478	-0.16	2.014	-0.565	-0.26	-0.552
INADL	-0.323	-0.056	1.941	-0.57	-0.105	-0.887
ING3	-0.391	0.826	1.632	-0.776	-0.83	-0.46
INHBB	-0.027	-0.624	1.986	-0.241	-0.611	-0.483
INO80D	-0.461	-0.011	2	-0.579	-0.495	-0.454
INPP5F	-0.496	0.484	1.708	-0.371	-0.12	-1.205
INSIG2	-0.29	0.498	1.81	-0.812	-0.662	-0.544
INSM1	0.735	0.955	0.797	-1.427	-0.927	-0.134
INTS2	-0.459	0.801	1.655	-0.552	-0.55	-0.896
INTS8	-0.247	1.208	1.312	-0.848	-0.61	-0.816
INTU	-0.424	0.782	1.625	-0.541	-0.38	-1.063
IPMK	-0.386	-0.205	2.009	-0.598	-0.608	-0.212
IPO11	-0.379	1.098	1.422	-0.815	-0.457	-0.869
IPO7	-0.343	0.365	1.872	-0.735	-0.707	-0.454
IPO8	-0.398	0.644	1.738	-0.812	-0.414	-0.758
IQCG	-0.519	0.287	1.835	-0.961	-0.596	-0.046
IQGAP1	-0.436	0.622	1.746	-0.664	-0.378	-0.89
IQGAP2	-0.385	0.17	1.944	-0.653	-0.676	-0.4
IRAK1BP1	-0.388	0.987	1.514	-0.849	-0.807	-0.457
IRAK3	-0.371	0.997	1.496	-0.656	-0.481	-0.984
IREB2	-0.465	0.462	1.852	-0.62	-0.574	-0.654
ITCH	-0.377	0.925	1.569	-0.721	-0.545	-0.851
ITFG1	-0.364	0.655	1.735	-0.718	-0.483	-0.825
ITGA1	-0.418	0.264	1.924	-0.661	-0.595	-0.514
ITGA2	-0.535	0.59	1.72	-0.68	-0.132	-0.962
ITGA4	-0.203	0.561	1.77	-0.665	-0.735	-0.727
ITGA6	-0.261	0.542	1.719	-0.555	-0.314	-1.13
ITGAV	-0.421	0.174	1.948	-0.688	-0.579	-0.434
ITGB1	-0.291	0.639	1.723	-0.849	-0.795	-0.427
ITGB1P1	-0.343	0.757	1.676	-0.814	-0.74	-0.536
ITGB3BP	0.132	1.102	0.765	-1.265	-1.177	0.443
ITGB8	-0.429	-0.114	2.017	-0.488	-0.561	-0.425
ITPR2	-0.435	-0.185	2.018	-0.654	-0.39	-0.354
ITSN2	-0.408	0.208	1.938	-0.714	-0.502	-0.521
IVNS1ABP	-0.461	0.195	1.9	-0.596	-0.169	-0.87
JAK2	-0.365	0.165	1.941	-0.703	-0.661	-0.376
JAKMIP2	-0.622	0.038	1.906	-0.83	-0.536	0.044
JAZF1	-0.571	0.703	1.672	-0.998	-0.58	-0.228
JHDM1D	-0.47	0.121	1.97	-0.615	-0.499	-0.507
JKAMP	-0.166	0.287	1.74	-1.098	-0.809	0.045
JMJD1C	-0.379	0.66	1.72	-0.731	-0.883	-0.387
JMY	-0.383	-0.173	2.022	-0.594	-0.48	-0.392
JRKL	-0.222	0.044	1.919	-0.817	-0.755	-0.169
KAL1	-0.23	0.65	1.711	-0.72	-0.909	-0.501
KANSL1L	-0.335	0.733	1.688	-0.816	-0.513	-0.757
KAT2B	-0.457	0.146	1.943	-0.316	-0.539	-0.777
KAT6B	-0.475	0.158	1.944	-0.602	-0.311	-0.713
KATNAL1	-0.401	0.281	1.891	-0.888	-0.39	-0.493
KATNBL1	-0.076	1.199	1.169	-0.945	-1.115	-0.232
KB-431C1.4	-0.031	1.57	0.668	-0.527	-0.394	-1.286
KBTBD2	-0.532	-0.204	2.001	-0.312	-0.232	-0.721
KBTBD6	-0.305	-0.49	1.878	-0.319	0.229	-0.993
KBTBD8	-0.035	0.812	1.395	-0.936	-1.232	-0.004
KCNAB1	-0.354	0.241	1.926	-0.572	-0.554	-0.687
KCND2	-0.224	0.211	1.88	-0.659	-0.926	-0.281
KCND3	-0.596	0.236	1.9	-0.435	-0.253	-0.852
KCNG3	-0.33	-0.375	2.019	-0.294	-0.694	-0.326
KCNH8	-0.396	-0.118	2.001	-0.642	-0.253	-0.592
KCNMB3	-0.43	-0.63	2.007	-0.458	-0.068	-0.42
KCNN3	0.384	1.032	0.114	0.288	0.101	-1.919
KCNQ1OT1	-0.436	-0.654	2.011	-0.24	-0.187	-0.494
KCNQ3	-0.773	-1.332	1.347	-0.379	0.674	0.463
KCNT2	-0.354	0.626	1.757	-0.649	-0.795	-0.585
KCTD12	-0.237	-0.209	2.017	-0.602	-0.457	-0.51
KCTD3	-0.386	0.15	1.953	-0.71	-0.482	-0.525
KCTD9	-0.469	0.55	1.802	-0.724	-0.455	-0.705
KDELC2	-0.489	0.22	1.919	-0.512	-0.321	-0.816
KDM3A	-0.181	0.714	1.663	-0.629	-0.598	-0.969
KDM6A	-0.429	1.021	1.47	-0.588	-0.434	-1.04
KIAA0020	-0.253	0.359	1.784	-0.878	-0.919	-0.093
KIAA0196	-0.35	0.714	1.69	-0.732	-0.437	-0.886
KIAA0232	-0.49	0.282	1.82	-0.618	-0.002	-0.993
KIAA0586	-0.485	0.746	1.703	-0.658	-0.555	-0.751
KIAA0825	-0.506	0.528	1.8	-0.801	-0.686	-0.334
KIAA0947	-0.363	0.294	1.906	-0.733	-0.577	-0.527
KIAA1009	0.064	1.148	0.854	-0.94	-1.409	0.283
KIAA1033	-0.341	0.754	1.595	-0.876	-0.992	-0.14
KIAA1109	-0.433	-0.025	2.001	-0.571	-0.556	-0.416
KIAA1244	-0.68	-0.849	1.855	-0.355	0.367	-0.338
KIAA1324L	-0.341	0.158	1.935	-0.768	-0.351	-0.632
KIAA1377	-0.337	0.143	1.953	-0.655	-0.468	-0.636
KIAA1429	-0.358	0.909	1.566	-0.788	-0.451	-0.878
KIAA1430	-0.44	0.26	1.923	-0.696	-0.591	-0.456
KIAA1468	-0.368	0.545	1.768	-0.622	-0.362	-0.961
KIAA1524	-0.159	1.131	1.299	-0.88	-1.06	-0.331
KIAA1551	-0.285	0.343	1.719	-0.94	-0.972	0.135
KIAA1586	0.021	0.547	1.562	-0.934	-1.178	-0.018
KIAA1598	-0.461	0.422	1.858	-0.448	-0.588	-0.782
KIAA1704	-0.282	0.957	1.465	-0.268	-0.808	-1.064
KIAA1715	-0.235	0.456	1.825	-0.726	-0.731	-0.589
KIAA1731	-0.436	0.615	1.767	-0.705	-0.765	-0.475
KIAA1841	-0.615	-0.266	2.027	-0.391	-0.424	-0.331
KIAA1958	-0.506	-0.274	1.985	-0.291	-0.122	-0.792
KIAA2018	-0.479	-0.198	2.028	-0.491	-0.374	-0.486
KIAA2026	-0.411	-0.157	2.016	-0.614	-0.511	-0.323
KIDINS220	-0.418	0.149	1.955	-0.673	-0.417	-0.596
KIF11	-0.441	0.214	1.938	-0.677	-0.581	-0.453
KIF14	-0.387	0.064	1.972	-0.629	-0.65	-0.371
KIF15	-0.41	0.825	1.639	-0.774	-0.79	-0.49
KIF16B	-0.354	0.629	1.754	-0.811	-0.573	-0.645
KIF18A	-0.214	0.78	1.267	-1.138	-1.123	0.429
KIF20B	0.107	0.609	1.019	-1.034	-1.414	0.714
KIF21A	-0.367	0.19	1.928	-0.677	-0.734	-0.34
KIF23	-0.352	0.682	1.719	-0.651	-0.531	-0.867
KIF27	-0.449	0.898	1.589	-0.868	-0.702	-0.468
KIF2A	-0.401	0.118	1.96	-0.711	-0.563	-0.403
KIF3A	-0.385	-0.022	1.971	-0.715	-0.64	-0.21
KIF5B	-0.344	-0.043	1.986	-0.646	-0.657	-0.295
KIF5C	-0.464	-0.193	1.991	-0.79	-0.194	-0.349
KIF6	-0.815	0.493	1.768	-0.885	-0.396	-0.166
KIN	-0.256	0.18	1.884	-0.87	-0.746	-0.193
KIT	-0.458	0.025	1.946	-0.191	-0.445	-0.877
KITLG	-0.282	0.886	1.586	-0.767	-0.807	-0.616
KLF12	-0.38	0.144	1.958	-0.659	-0.526	-0.538
KLF3	-0.457	0.077	1.957	-0.563	-0.258	-0.756
KLF7	-0.73	-0.669	1.895	0.166	-0.03	-0.632
KLHL14	-0.366	0.232	1.913	-0.516	-0.421	-0.843
KLHL15	-0.221	0.441	1.788	-0.863	-0.855	-0.29
KLHL2	-0.517	0.461	1.853	-0.589	-0.54	-0.669
KLHL23	-0.244	-0.109	1.941	-0.39	-0.216	-0.981
KLHL24	-0.459	0.185	1.948	-0.434	-0.584	-0.656
KLHL28	-0.42	0.244	1.925	-0.625	-0.431	-0.692
KLHL4	-0.426	1.192	1.366	-0.81	-0.642	-0.68
KLHL42	-0.3	-0.39	2.034	-0.536	-0.345	-0.463
KLHL7-AS1	-0.413	0.155	1.93	-0.468	-0.342	-0.863
KLHL8	-0.385	-0.24	2.012	-0.597	-0.197	-0.593
KLHL9	-0.182	0.677	1.678	-0.881	-0.849	-0.444
KLRAP1	-0.46	-0.087	2.013	-0.523	-0.54	-0.402
KMT2A	-0.379	-0.738	1.966	-0.345	0.066	-0.57
KMT2C	-0.401	-0.416	2.023	-0.438	-0.178	-0.59
KMT2E	-0.424	-0.147	2.022	-0.432	-0.48	-0.539
KNTC1	-0.434	0.569	1.791	-0.776	-0.663	-0.488
KPNA3	-0.396	0.644	1.754	-0.602	-0.631	-0.769
KPNA4	-0.429	0.574	1.764	-0.49	-0.454	-0.965
KPNA5	-0.177	0.612	1.6	-0.873	-1.127	-0.035
KRAS	-0.443	0.058	1.983	-0.635	-0.5	-0.462
KRCC1	0.055	1.155	0.954	-1.254	-1.074	0.163
KRIT1	-0.471	0.153	1.961	-0.61	-0.559	-0.473
KRR1	-0.082	0.368	1.663	-0.919	-1.115	0.085
KTN1	-0.262	0.885	1.493	-0.913	-1.026	-0.178
L1TD1	-0.446	0.246	1.884	-0.784	-0.743	-0.157
LACC1	-0.29	0.199	1.89	-0.757	-0.827	-0.215
LAMA2	-0.355	-0.039	1.946	-0.58	-0.115	-0.857
LAMP2	-0.504	0.696	1.688	-0.429	-0.427	-1.023
LAMTOR3	-0.227	0.483	1.655	-1.094	-0.88	0.062
LANCL1	-0.344	0.696	1.704	-0.814	-0.794	-0.448
LARP1B	-0.246	0.21	1.886	-0.823	-0.773	-0.252
LARP4	-0.408	0.309	1.909	-0.608	-0.602	-0.6
LARP7	-0.248	0.761	1.548	-0.9	-1.071	-0.09
LATS1	-0.493	-0.08	2.012	-0.524	-0.384	-0.53
LCA5	-0.253	0.17	1.829	-0.803	-0.958	0.015
LCLAT1	-0.421	1.331	1.151	-0.412	-0.511	-1.138
LCOR	-0.428	-0.047	2.007	-0.56	-0.514	-0.458
LCORL	-0.289	0.331	1.79	-0.836	-0.95	-0.046
LEMD3	-0.195	0.095	1.951	-0.656	-0.612	-0.583
LEO1	-0.459	0.045	1.989	-0.564	-0.535	-0.476
LEPR	-0.238	1.296	1.198	-0.832	-0.96	-0.464
LEPROT	-0.498	0.572	1.744	-0.305	-0.485	-1.027
LGR4	-0.182	0.017	1.935	-0.686	-0.827	-0.257
LHCGR	-0.482	0.213	1.925	-0.293	-0.702	-0.66
LHX1	-0.477	-0.908	1.708	0.706	-0.468	-0.56
LHX4	-0.288	-0.242	1.941	0.047	-0.837	-0.622
LIFR	-0.416	0.26	1.923	-0.689	-0.598	-0.48
LIG4	-0.235	0.496	1.502	-1.041	-1.102	0.38
LIMA1	-0.407	0.982	1.498	-0.739	-0.357	-0.976
LIMCH1	-0.481	0.583	1.754	-0.483	-0.387	-0.985
LIMS1	-0.649	0.033	1.947	-0.319	-0.212	-0.8
LIN28B	-0.369	0.415	1.85	-0.727	-0.755	-0.415
LIN54	-0.466	0.506	1.829	-0.596	-0.551	-0.723
LIN7A	-0.577	0.743	1.68	-0.875	-0.655	-0.315
LIN7C	-0.387	0.66	1.737	-0.733	-0.788	-0.488
LIN9	-0.171	0.67	1.574	-0.975	-1.044	-0.055
LINC00052	-0.854	0.115	1.925	-0.485	-0.538	-0.163
LINC00641	-0.51	0.129	1.965	-0.65	-0.444	-0.491
LINC00657	-0.465	-0.012	1.988	-0.531	-0.306	-0.674
LINC00664	-0.346	-0.716	1.778	-0.055	0.372	-1.033
LINC00669	-0.117	1.034	1.34	-0.64	-1.259	-0.358
LINC00890	-0.45	0.986	1.541	-0.728	-0.605	-0.745
LINS	-0.372	0.601	1.736	-0.699	-0.321	-0.946
LLPH	-0.395	0.255	1.849	-0.649	-0.096	-0.964
LMAN1	-0.373	0.232	1.923	-0.681	-0.694	-0.407
LMBRD1	-0.17	0.666	1.539	-1.173	-0.885	0.023
LMBRD2	-0.29	0.906	1.54	-0.822	-0.946	-0.389
LMLN	-0.551	0.483	1.812	-0.654	-0.265	-0.825
LMO7	-0.426	0.056	1.957	-0.284	-0.484	-0.819
LNPEP	-0.425	0.098	1.953	-0.606	-0.278	-0.743
LOX	0.101	0.32	1.25	0.038	0.112	-1.82
LPAR4	-0.159	0.861	1.405	-0.976	-1.143	0.012
LPAR6	-1.192	0.051	0.97	-1.203	0.336	1.038
LPCAT2	-0.556	0.464	1.851	-0.511	-0.561	-0.688
LPGAT1	-0.417	0.458	1.841	-0.733	-0.457	-0.693
LPHN2	-0.35	0.652	1.736	-0.774	-0.483	-0.78
LPHN3	-0.239	0.593	1.709	-0.503	-0.464	-1.096
LPP	-0.422	-0.286	2.03	-0.58	-0.303	-0.439
LPPR4	-0.585	-0.228	2.024	-0.309	-0.395	-0.507
LRAT	-0.429	0.069	1.964	-0.757	-0.53	-0.317
LRBA	-0.435	0.21	1.934	-0.713	-0.396	-0.6
LRCH2	-0.368	0.47	1.808	-0.742	-0.853	-0.315
LRIF1	-0.125	0.776	1.607	-0.862	-0.902	-0.494
LRP12	-0.374	0.109	1.96	-0.602	-0.391	-0.701
LRP6	-0.427	-0.092	2.007	-0.573	-0.323	-0.592
LRPPRC	-0.359	0.598	1.772	-0.743	-0.729	-0.54
LRRC2	-0.378	-0.102	1.978	-0.52	-0.184	-0.794
LRRC34	-0.208	0.198	1.763	-1.095	-0.773	0.115
LRRC37A17P	-0.325	-0.338	1.95	-0.493	0.061	-0.855
LRRC37A4P	-0.303	-0.337	1.932	-0.412	0.063	-0.943
LRRC40	-0.217	0.305	1.679	-0.989	-1.005	0.227
LRRC49	-0.163	0.342	1.583	-1.164	-0.937	0.34
LRRC58	-0.406	-0.077	2.009	-0.606	-0.509	-0.41
LRRC8B	-0.444	0.103	1.967	-0.694	-0.413	-0.52
LRRC8C	-0.436	0.118	1.95	-0.421	-0.401	-0.81
LRRCC1	0.052	0.6	0.98	-1.134	-1.314	0.816
LRRFIP1	-0.486	-0.227	2.026	-0.525	-0.291	-0.498
LRRIQ3	0.104	1.416	0.423	-1.163	-1.148	0.368
LRRN1	-0.472	0.11	1.911	-0.213	-0.369	-0.966
LRRTM4	-0.343	1.066	1.465	-0.779	-0.703	-0.707
LSM14A	-0.512	-0.206	1.98	-0.473	-0.046	-0.742
LTN1	-0.31	0.922	1.516	-0.785	-1.015	-0.329
LTV1	-0.33	0.397	1.848	-0.824	-0.695	-0.396
LUC7L3	-0.294	0.114	1.905	-0.736	-0.843	-0.145
LUZP2	-0.461	0.347	1.897	-0.634	-0.638	-0.511
LYAR	-0.511	0.098	1.974	-0.604	-0.406	-0.551
LYPLA1	-0.291	1.314	1.215	-0.812	-0.846	-0.58
LYRM5	0.096	0.951	0.594	-1.335	-1.129	0.822
LYRM7	-0.424	-0.025	1.971	-0.774	-0.538	-0.209
LYSMD3	-0.299	0.127	1.857	-0.835	-0.866	0.016
LZTFL1	-0.26	0.798	1.623	-0.826	-0.876	-0.46
MAATS1	-0.315	0.428	1.845	-0.773	-0.518	-0.668
MACC1	-0.383	-0.038	1.99	-0.687	-0.567	-0.315
MAD2L1	-0.046	1.048	1.24	-0.985	-1.177	-0.081
MAGI2-AS3	-0.268	0.417	1.846	-0.756	-0.672	-0.568
MAK16	-0.447	0.908	1.595	-0.621	-0.628	-0.807
MAL2	-0.476	-0.216	2.014	-0.672	-0.382	-0.269
MALAT1	-0.429	-0.296	2.036	-0.507	-0.389	-0.416
MALT1	-0.181	0.541	1.774	-0.647	-0.721	-0.767
MAML2	-0.49	-0.203	2.002	-0.134	-0.538	-0.636
MAN1A1	-0.266	-0.088	1.954	-0.905	-0.497	-0.197
MAN1A2	-0.408	-0.158	2.021	-0.599	-0.44	-0.417
MAN2A1	-0.353	-0.029	1.987	-0.691	-0.58	-0.335
MANEA	-0.2	1.033	1.179	-1.131	-1.087	0.206
MAP10	-0.101	0.261	1.876	-0.707	-0.758	-0.572
MAP1B	-0.465	-0.052	2.003	-0.52	-0.356	-0.611
MAP2	-0.397	-0.019	1.978	-0.54	-0.27	-0.752
MAP2K4	-0.329	0.773	1.665	-0.759	-0.546	-0.805
MAP3K1	-0.404	0.104	1.956	-0.46	-0.407	-0.789
MAP3K13	-0.54	0.327	1.857	-0.435	-0.263	-0.946
MAP3K2	-0.438	-0.072	2.01	-0.582	-0.489	-0.429
MAP3K7	-0.302	0.597	1.768	-0.674	-0.634	-0.755
MAP3K8	-0.235	0.248	1.506	0.428	-0.455	-1.492
MAP4K3	-0.336	0.512	1.794	-0.788	-0.801	-0.381
MAP4K5	-0.399	0.202	1.941	-0.626	-0.654	-0.464
MAP7D3	-0.421	0.669	1.734	-0.706	-0.471	-0.805
MAP9	-0.312	1.174	1.261	-0.946	-1.004	-0.174
MAPK6	-0.425	0.427	1.841	-0.782	-0.723	-0.338
MAPK8	-0.355	0.823	1.642	-0.647	-0.653	-0.811
MASTL	-0.417	1.035	1.444	-0.479	-0.484	-1.098
MATR3	-0.293	0.965	1.521	-0.778	-0.887	-0.527
MBD4	-0.427	0.703	1.728	-0.655	-0.671	-0.677
MBD5	-0.279	-0.083	1.999	-0.677	-0.496	-0.463
MBIP	-0.2	1.195	1.273	-0.88	-0.987	-0.401
MBLAC2	-0.201	0.744	1.648	-0.787	-0.905	-0.499
MBNL1	-0.372	1.163	1.386	-0.746	-0.781	-0.65
MBNL2	-0.252	0.033	1.973	-0.52	-0.686	-0.548
MBNL3	-0.455	0.174	1.954	-0.6	-0.595	-0.478
MBOAT2	-0.467	0.18	1.93	-0.754	-0.268	-0.621
MBTD1	-0.425	0.189	1.946	-0.652	-0.602	-0.457
MBTPS2	-0.471	0.301	1.898	-0.665	-0.335	-0.728
MCF2	-0.418	0.536	1.76	-0.855	-0.814	-0.209
MCF2L2	-0.36	-0.002	1.995	-0.547	-0.564	-0.522
MCM8	-0.483	-0.09	2.009	-0.6	-0.334	-0.502
MCM9	-0.617	-0.084	1.934	-0.14	-0.19	-0.903
MCOLN3	-0.376	-0.316	2.037	-0.464	-0.497	-0.385
MCTP1	-0.491	-0.212	1.901	-0.813	-0.619	0.235
MDFIC	-0.635	-0.194	2.002	-0.616	-0.363	-0.193
MDM1	-0.284	0.988	1.514	-0.825	-0.694	-0.699
MDM2	-0.484	0.342	1.882	-0.466	-0.438	-0.835
MDM4	-0.549	-0.006	1.844	0.06	-0.237	-1.112
MED1	-0.438	-0.12	1.937	-0.753	0.062	-0.687
MED12L	-0.511	0.081	1.977	-0.567	-0.39	-0.59
MED13	-0.412	-0.161	2.024	-0.505	-0.418	-0.527
MED23	-0.417	0.771	1.678	-0.69	-0.533	-0.809
MED4	-0.38	0.755	1.687	-0.592	-0.81	-0.659
MEF2A	-0.391	0.383	1.878	-0.596	-0.579	-0.695
MEGF10	-0.093	-0.329	2.01	-0.516	-0.52	-0.552
MEGF9	-0.5	0.273	1.821	-0.205	-0.276	-1.114
MEIS3P1	-0.181	-0.637	2.004	-0.42	-0.191	-0.576
MEIS3P2	-0.215	-0.79	1.979	-0.195	-0.199	-0.581
MET	-0.362	0.537	1.741	-0.729	-0.2	-0.988
METAP2	-0.385	-0.071	1.968	-0.728	-0.652	-0.132
METTL10	-0.319	0.003	1.979	-0.652	-0.658	-0.353
METTL14	-0.347	-0.025	1.926	-0.801	-0.727	-0.025
METTL15	-0.376	0.925	1.572	-0.819	-0.728	-0.575
METTL18	-0.005	0.458	1.41	-1.164	-1.126	0.427
METTL21D	-0.283	0.377	1.855	-0.73	-0.785	-0.434
METTL4	-0.426	0.471	1.824	-0.833	-0.375	-0.661
MEX3C	-0.193	-0.207	2.01	-0.557	-0.44	-0.614
MFAP3	-0.454	0.84	1.629	-0.773	-0.437	-0.804
MFAP3L	-0.332	0.105	1.963	-0.574	-0.684	-0.478
MFN1	-0.366	0.662	1.739	-0.772	-0.698	-0.565
MFSD8	-0.459	0.505	1.818	-0.749	-0.405	-0.709
MGA	-0.424	0.431	1.829	-0.832	-0.285	-0.719
MGAT4A	-0.301	0.306	1.88	-0.872	-0.571	-0.442
MGAT4C	-0.153	0.458	0.135	-1.299	-0.731	1.589
MGEA5	-0.461	-0.267	1.994	-0.433	-0.097	-0.736
MIA3	-0.391	-0.005	1.996	-0.622	-0.505	-0.472
MIB1	-0.317	-0.071	1.992	-0.654	-0.632	-0.318
MICU2	-0.2	0.668	1.637	-0.9	-0.988	-0.216
MICU3	-0.172	0.526	1.721	-0.788	-1.02	-0.266
MIER1	-0.412	0.691	1.729	-0.724	-0.725	-0.56
MIER3	-0.304	0.588	1.758	-0.772	-0.822	-0.448
MIPOL1	-0.284	0.805	1.46	-1.112	-0.946	0.077
MIR17HG	-0.432	-0.148	2.017	-0.539	-0.571	-0.328
MIR3916	-0.463	0.741	1.698	-0.602	-0.539	-0.836
MIR4720	-0.334	-0.626	2.013	-0.54	-0.148	-0.364
MIS18BP1	-0.048	1.269	0.934	-0.996	-1.233	0.074
MITF	-0.396	0.929	1.552	-0.924	-0.431	-0.73
MKI67	-0.259	-0.576	1.941	-0.508	0.148	-0.746
MKL2	-0.392	-0.224	2.022	-0.471	-0.312	-0.623
MKLN1	-0.479	0.717	1.647	-0.796	-0.147	-0.943
MKX	-0.404	0.497	1.83	-0.557	-0.694	-0.672
MLF1IP	-0.216	0.431	1.715	-0.922	-0.987	-0.021
MLH3	-0.514	0.984	1.541	-0.791	-0.507	-0.714
MLK4	-0.361	-0.523	2.037	-0.399	-0.348	-0.408
MLLT10	-0.485	1.038	1.403	-0.55	-0.24	-1.166
MLLT3	-0.256	1.205	1.28	-0.742	-0.439	-1.049
MLTK	-0.622	0.134	1.891	-0.774	0.019	-0.648
MMD	-0.439	0.485	1.838	-0.563	-0.701	-0.621
MME	-0.393	0.506	1.814	-0.776	-0.705	-0.447
MMGT1	-0.47	0.682	1.737	-0.603	-0.56	-0.786
MMP10	-1.149	-0.002	1.273	1.124	-0.522	-0.724
MMP16	-0.278	0.234	1.92	-0.617	-0.696	-0.562
MMS22L	-0.433	0.297	1.913	-0.666	-0.595	-0.517
MNS1	0.071	0.182	1.382	-1.15	-1.14	0.656
MOB1A	-0.294	0.686	1.715	-0.698	-0.807	-0.601
MOB1B	-0.46	0.232	1.935	-0.626	-0.622	-0.459
MOB4	-0.33	0.594	1.707	-0.886	-0.896	-0.189
MON2	-0.429	0.476	1.83	-0.686	-0.422	-0.769
MORC3	-0.304	0.8	1.62	-0.846	-0.88	-0.39
MORF4L2-AS1	-0.389	0.506	1.696	-0.645	-0.027	-1.14
MOSPD1	-0.245	0.546	1.523	-1.266	-0.81	0.252
MOSPD2	-0.332	0.616	1.712	-0.824	-0.914	-0.258
MPDZ	-0.446	0.117	1.969	-0.627	-0.471	-0.543
MPHOSPH10	-0.291	0.25	1.874	-0.786	-0.821	-0.227
MPHOSPH6	-0.186	-0.025	1.639	-1.141	-0.827	0.54
MPHOSPH8	-0.373	-0.003	1.94	-0.77	-0.091	-0.704
MPHOSPH9	-0.447	1.037	1.496	-0.802	-0.734	-0.55
MPP5	-0.439	0.197	1.947	-0.645	-0.534	-0.526
MPP6	-0.446	-0.132	2.02	-0.503	-0.396	-0.543
MPP7	-0.493	0.658	1.744	-0.753	-0.42	-0.736
MPZL2	-0.332	1.322	1.167	-0.841	-0.979	-0.338
MRE11A	-0.404	0.419	1.834	-0.825	-0.726	-0.298
MRPL1	0.06	1.107	0.893	-1.208	-1.185	0.333
MRPL42	-0.013	0.977	1.153	-1.196	-1.116	0.195
MRPL50	0.045	0.793	1.261	-1.104	-1.227	0.233
MSANTD4	-0.246	-0.201	1.996	-0.734	-0.556	-0.259
MSH2	-0.373	0.334	1.89	-0.685	-0.702	-0.465
MSH6	-0.385	0.057	1.964	-0.673	-0.286	-0.676
MSI2	-0.324	0.241	1.882	-0.411	-0.41	-0.978
MST4	-0.281	0.994	1.498	-0.75	-0.899	-0.563
MT-ND5	-1.068	-1.23	0.063	0.08	0.995	1.161
MTAP	-0.534	0.199	1.907	-0.37	-0.301	-0.901
MTBP	-0.312	0.953	1.548	-0.717	-0.758	-0.714
MTDH	-0.314	0.344	1.885	-0.662	-0.687	-0.566
MTERF	-0.306	0.181	1.809	-0.917	-0.866	0.099
MTERFD1	-0.043	1.047	1.194	-0.974	-1.236	0.013
MTERFD3	-0.457	0.325	1.849	-0.956	-0.56	-0.2
MTF2	-0.358	0.327	1.87	-0.816	-0.713	-0.309
MTHFD2L	-0.288	0.862	1.585	-0.494	-0.961	-0.705
MTIF2	-0.384	0.117	1.914	-0.94	-0.501	-0.205
MTM1	-0.337	1.171	1.368	-0.794	-0.813	-0.594
MTMR10	-0.496	0.281	1.88	-0.36	-0.369	-0.936
MTMR2	-0.382	0.814	1.644	-0.819	-0.513	-0.745
MTMR6	-0.296	1.135	1.389	-0.876	-0.761	-0.591
MTMR7	-0.354	1.097	1.425	-0.682	-0.555	-0.932
MTMR9	-0.471	0.351	1.875	-0.777	-0.32	-0.659
MTPAP	-0.491	0.274	1.907	-0.405	-0.473	-0.812
MTPN	-0.307	0.536	1.786	-0.898	-0.544	-0.572
MTR	-0.426	-0.231	1.993	-0.513	-0.102	-0.72
MTRNR2L12	0.144	0.293	-0.293	-0.804	-1.074	1.734
MTUS1	-0.478	0.177	1.949	-0.425	-0.528	-0.695
MTX3	-0.479	-0.137	2.02	-0.55	-0.469	-0.384
MUC19	-0.431	-0.242	2.031	-0.545	-0.378	-0.436
MUM1L1	-0.182	0.954	1.38	-0.777	-1.237	-0.138
MURC	-0.459	-0.286	2.037	-0.449	-0.405	-0.438
MUT	-0.405	0.558	1.793	-0.826	-0.524	-0.596
MXD1	-0.733	-0.479	1.901	-0.034	0.123	-0.778
MYBL1	-0.411	0.491	1.82	-0.761	-0.728	-0.411
MYCBP2	-0.423	-0.097	1.999	-0.659	-0.262	-0.559
MYEF2	-0.439	0.075	1.978	-0.628	-0.557	-0.429
MYNN	-0.15	0.902	1.43	-1.003	-1.047	-0.132
MYO1B	-0.336	0.316	1.892	-0.782	-0.568	-0.522
MYO3A	-0.449	0.149	1.962	-0.576	-0.603	-0.483
MYO5A	-0.478	0.218	1.938	-0.581	-0.43	-0.668
MYO5C	-0.464	0.618	1.73	-0.636	-0.286	-0.962
MYO6	-0.433	0.27	1.922	-0.669	-0.508	-0.582
MYO9A	-0.425	0.244	1.926	-0.738	-0.498	-0.509
MYRIP	-0.311	0.427	1.832	-0.487	-0.908	-0.552
MYSM1	-0.481	-0.21	2.028	-0.498	-0.502	-0.335
N4BP2	-0.449	0.299	1.903	-0.695	-0.682	-0.376
N4BP2L1	-0.796	1.153	1.356	-0.576	-0.235	-0.901
N4BP2L2	-0.29	0.365	1.781	-0.931	-0.861	-0.064
NAA15	-0.378	0.529	1.813	-0.659	-0.701	-0.604
NAA16	-0.468	0.427	1.862	-0.517	-0.568	-0.736
NAA25	-0.449	0.232	1.928	-0.744	-0.533	-0.435
NAA30	-0.307	-0.434	2.008	-0.732	-0.207	-0.328
NAA35	-0.316	0.768	1.626	-0.597	-0.416	-1.065
NAA38	-0.054	0.703	1.463	-0.993	-1.172	0.053
NAA50	-0.371	0.039	1.978	-0.709	-0.521	-0.416
NAALAD2	-0.369	0.01	1.991	-0.581	-0.464	-0.587
NAB1	-0.313	0.544	1.798	-0.685	-0.68	-0.664
NABP1	-0.241	-0.256	1.914	-0.426	0.023	-1.015
NADK2	-0.432	0.147	1.957	-0.659	-0.421	-0.592
NAE1	-0.278	0.453	1.761	-0.949	-0.833	-0.153
NAMPT	-0.227	0.504	1.754	-0.869	-0.887	-0.275
NAP1L1	-0.279	0.45	1.825	-0.758	-0.771	-0.467
NAP1L2	-0.219	0.359	1.835	-0.881	-0.75	-0.345
NAPEPLD	-0.149	-0.123	1.982	-0.529	-0.421	-0.76
NAPG	-0.39	0.657	1.746	-0.74	-0.565	-0.708
NARG2	-0.35	0.546	1.777	-0.787	-0.813	-0.372
NARS	-0.333	0.446	1.806	-1.004	-0.505	-0.411
NASP	-0.43	-0.425	1.981	-0.584	0.06	-0.603
NAT2	-0.492	0.962	1.56	-0.664	-0.796	-0.57
NAV3	-0.531	-0.083	1.925	-0.863	0.058	-0.506
NBEA	-0.434	-0.17	2.026	-0.522	-0.416	-0.484
NBEAL1	-0.506	0.4	1.875	-0.715	-0.571	-0.484
NBN	-0.18	0.567	1.675	-0.852	-1.042	-0.167
NCAPG	-0.359	0.472	1.821	-0.824	-0.689	-0.422
NCBP2	-0.548	0.125	1.882	-0.486	-0.02	-0.952
NCK1	-0.413	0.344	1.866	-0.855	-0.636	-0.306
NCKAP1	-0.235	0.792	1.622	-0.818	-0.893	-0.467
NCOA1	-0.486	0.158	1.897	-0.513	-0.127	-0.929
NCOA2	-0.424	0.438	1.843	-0.662	-0.398	-0.796
NCOA3	-0.445	0.267	1.8	-0.431	-0.049	-1.142
NCOA7	-0.519	0.741	1.689	-0.821	-0.37	-0.72
NDC80	-0.187	1.302	1.186	-0.925	-0.866	-0.51
NDFIP2	-0.247	1.195	1.283	-0.995	-0.852	-0.385
NDUFA5	0.031	0.252	1.409	-1.131	-1.151	0.589
NEAT1	-0.326	-0.461	1.928	-0.246	0.053	-0.948
NEB	-0.465	-0.09	2.003	-0.679	-0.321	-0.448
NEBL	-0.315	0.05	1.972	-0.679	-0.616	-0.413
NECAB1	-0.376	0.302	1.455	-1.121	-0.955	0.695
NEDD1	-0.209	0.393	1.745	-0.931	-0.941	-0.057
NEDD4	-0.414	0.697	1.697	-0.843	-0.801	-0.336
NEGR1	-0.445	0.726	1.714	-0.727	-0.686	-0.581
NEK1	-0.433	0.188	1.935	-0.71	-0.644	-0.336
NEK2	-0.23	0.356	1.776	-1.034	-0.767	-0.102
NEK4	-0.356	0.982	1.504	-0.808	-0.417	-0.906
NEK7	-0.14	0.577	1.604	-0.889	-1.133	-0.02
NEMF	-0.089	0.367	1.596	-0.911	-1.194	0.23
NEXN	-0.24	-0.003	1.952	-0.709	-0.755	-0.244
NF1	-0.445	0.259	1.909	-0.69	-0.317	-0.716
NFAT5	-0.454	-0.205	2.028	-0.539	-0.362	-0.467
NFE2L2	-0.341	-0.101	1.983	-0.705	-0.635	-0.201
NFE2L3	-0.388	-0.455	2.017	-0.115	-0.559	-0.5
NFIB	-0.41	0.377	1.878	-0.704	-0.471	-0.669
NFXL1	-0.371	0.608	1.767	-0.813	-0.591	-0.601
NFYB	0.178	0.479	1.303	-1.085	-1.298	0.424
NHLRC2	-0.457	0.376	1.886	-0.599	-0.545	-0.661
NHS	-0.374	-0.197	2.027	-0.498	-0.422	-0.537
NIN	-0.399	-0.258	2.024	-0.6	-0.496	-0.27
NIPA1	-0.595	-0.427	1.97	-0.745	-0.156	-0.047
NIPAL1	-0.506	0.499	1.836	-0.622	-0.534	-0.673
NIPBL	-0.423	0.224	1.934	-0.674	-0.612	-0.447
NKTR	-0.423	-0.196	2.027	-0.535	-0.496	-0.377
NLGN1	-0.371	0.488	1.832	-0.653	-0.688	-0.607
NLN	-0.326	0.429	1.842	-0.822	-0.494	-0.631
NMD3	-0.085	0.562	1.507	-1.015	-1.157	0.188
NOC3L	-0.141	1.236	1.193	-0.885	-1.061	-0.342
NOL11	-0.138	0.648	1.583	-1.027	-0.997	-0.07
NOL8	-0.426	0.532	1.81	-0.718	-0.712	-0.486
NOP58	-0.181	-0.049	1.858	-0.869	-0.865	0.106
NOX4	-0.845	-0.845	1.808	0.177	0.191	-0.486
NPAT	-0.382	0.385	1.857	-0.702	-0.799	-0.358
NPHP3	-0.475	0.283	1.91	-0.659	-0.37	-0.689
NPIPB3	-0.843	-1.111	1.473	0.738	0.265	-0.522
NPIPB4	-0.784	-0.952	1.525	0.9	-0.116	-0.574
NPY1R	-0.596	0.395	1.875	-0.719	-0.503	-0.452
NR1D2	-0.436	-0.084	2.013	-0.574	-0.44	-0.478
NR2C1	-0.279	0.753	1.668	-0.728	-0.854	-0.561
NR3C1	-0.369	0.817	1.65	-0.745	-0.63	-0.723
NR5A2	-0.125	0.721	1.58	-0.751	-0.272	-1.153
NRAS	-0.491	1.009	1.521	-0.754	-0.515	-0.77
NRCAM	-0.443	0.755	1.69	-0.749	-0.501	-0.752
NRIP1	-0.387	0.322	1.892	-0.731	-0.675	-0.421
NRK	-0.469	0.313	1.909	-0.668	-0.575	-0.509
NRXN1	-0.479	-0.503	2.034	-0.433	-0.288	-0.331
NSRP1	-0.476	-0.03	2.005	-0.538	-0.477	-0.484
NSUN3	-0.382	-0.374	2.037	-0.483	-0.312	-0.486
NT5C3A	-0.333	0.495	1.811	-0.854	-0.622	-0.497
NT5DC1	-0.334	0.538	1.804	-0.675	-0.685	-0.647
NTS	-0.339	0.948	0.322	-1.42	-0.69	1.179
NUCB2	-0.143	0.236	1.547	-1.186	-0.942	0.487
NUCKS1	-0.409	0.386	1.869	-0.794	-0.479	-0.574
NUDCD1	-0.149	1.041	1.264	-1.079	-1.064	-0.012
NUDT12	-0.175	0.879	1.372	-1.071	-1.078	0.073
NUDT21	-0.365	0.67	1.725	-0.763	-0.802	-0.465
NUF2	-0.102	0.881	1.349	-1.051	-1.134	0.056
NUFIP2	-0.414	0.018	1.992	-0.58	-0.456	-0.56
NUP107	-0.421	1.006	1.513	-0.884	-0.612	-0.603
NUP153	-0.478	-0.044	1.911	-0.24	-0.126	-1.022
NUP35	-0.1	0.216	1.643	-1.054	-1.018	0.314
NUP50	-0.346	0.376	1.862	-0.686	-0.411	-0.795
NUP54	-0.243	0.782	1.645	-0.787	-0.818	-0.579
NUPL1	-0.434	0.721	1.695	-0.586	-0.471	-0.925
NUS1	-0.474	-0.032	1.983	-0.488	-0.253	-0.736
NUS1P2	-0.595	1.426	0.975	-0.211	-0.383	-1.212
NUSAP1	-0.367	0.545	1.785	-0.873	-0.435	-0.655
NXT2	-0.065	1.144	1.004	-1.19	-1.104	0.211
OCLN	-0.386	0.251	1.879	-0.622	-0.214	-0.908
ODF2L	-0.422	0.537	1.769	-0.807	-0.834	-0.243
OFD1	-0.449	0.623	1.773	-0.643	-0.606	-0.698
OGFRL1	-0.462	0.008	1.986	-0.655	-0.561	-0.316
OLFM3	-0.032	0.397	1.755	-0.42	-1.116	-0.583
OMA1	-0.447	0.589	1.739	-1.014	-0.547	-0.321
ONECUT2	-0.386	-0.122	1.98	-0.508	-0.171	-0.793
OPA1	-0.387	0.346	1.888	-0.701	-0.668	-0.478
ORC3	-0.077	0.811	1.287	-1.132	-1.153	0.262
ORC4	-0.031	1.139	1.107	-1.114	-1.112	0.011
ORMDL1	-0.356	-0.06	1.967	-0.846	-0.489	-0.216
OSBPL8	-0.302	0.308	1.834	-0.778	-0.905	-0.157
OSBPL9	-0.57	0.405	1.86	-0.7	-0.319	-0.677
OSGIN2	-0.321	0.1	1.959	-0.717	-0.601	-0.419
OSTM1	0.073	0.573	1.578	-0.934	-1.131	-0.159
OTUD1	-0.411	-0.685	1.9	0.153	-0.111	-0.846
OTUD3	-0.352	-0.603	1.93	-0.446	0.21	-0.739
OTUD4	-0.443	-0.035	2.003	-0.594	-0.43	-0.501
OTUD6B	-0.241	0.284	1.622	-1.047	-0.996	0.378
OTX2	-0.491	1.049	1.447	-0.493	-0.454	-1.057
OXCT1	-0.332	0.362	1.859	-0.898	-0.437	-0.553
OXR1	-0.182	0.766	1.56	-1.028	-0.923	-0.193
OXTR	-0.489	-0.607	1.983	-0.529	0.064	-0.422
PABPC4L	-0.357	0.06	1.967	-0.673	-0.657	-0.34
PAG1	-0.739	-0.556	1.907	-0.595	0.271	-0.289
PAIP2	-0.16	0.372	1.67	-0.967	-1.046	0.13
PAK3	-0.318	0.803	1.619	-0.579	-0.503	-1.022
PALB2	-0.396	0.652	1.751	-0.701	-0.58	-0.726
PALM2	-0.463	0.062	1.974	-0.539	-0.344	-0.691
PAN3	-0.415	0.035	1.986	-0.455	-0.499	-0.651
PANK3	-0.47	0.224	1.941	-0.615	-0.538	-0.543
PAPD4	-0.376	0.518	1.794	-0.787	-0.788	-0.361
PAPD5	-0.248	0.139	1.928	-0.784	-0.681	-0.354
PAPOLA	-0.403	0.946	1.567	-0.732	-0.639	-0.738
PAPOLG	-0.372	0.492	1.83	-0.626	-0.651	-0.673
PAQR3	-0.339	0.727	1.675	-0.862	-0.806	-0.395
PARD6B	-0.431	0.221	1.933	-0.523	-0.469	-0.731
PARG	-0.317	0.748	1.672	-0.871	-0.505	-0.728
PARGP1	-0.414	0.648	1.751	-0.8	-0.595	-0.589
PARP11	-0.514	0.279	1.902	-0.501	-0.352	-0.815
PARP14	-0.417	0.27	1.92	-0.697	-0.502	-0.574
PARP8	-0.602	0.521	1.827	-0.572	-0.511	-0.663
PARPBP	-0.196	1.347	1.106	-0.895	-0.993	-0.37
PAWR	-0.441	0.242	1.927	-0.734	-0.491	-0.503
PAXBP1	-0.41	0.073	1.981	-0.53	-0.568	-0.546
PBK	-0.118	0.368	1.726	-1.021	-0.908	-0.047
PBLD	-0.582	-0.101	1.865	-0.309	0.154	-1.026
PBRM1	-0.483	0.284	1.918	-0.662	-0.467	-0.592
PCDH11X	-0.504	0.604	1.778	-0.706	-0.455	-0.718
PCDH19	-0.502	-0.745	1.947	0.049	-0.13	-0.619
PCDH20	-0.239	1.37	1.143	-0.907	-0.709	-0.658
PCDH8	-0.364	-0.976	1.843	0.285	-0.141	-0.647
PCF11	-0.416	0.072	1.98	-0.597	-0.577	-0.461
PCLO	-0.464	-0.358	2.036	-0.491	-0.289	-0.433
PCM1	-0.446	0.179	1.948	-0.684	-0.573	-0.424
PCMTD1	-0.271	0.495	1.803	-0.723	-0.818	-0.485
PCMTD2	-0.407	1.06	1.473	-0.657	-0.602	-0.865
PCNP	-0.25	0.614	1.688	-0.865	-0.954	-0.233
PCNXL4	-0.428	0.869	1.607	-0.651	-0.5	-0.897
PDCD10	0.046	0.735	1.102	-1.187	-1.24	0.544
PDCD4	-0.543	0	1.989	-0.426	-0.354	-0.666
PDE10A	-0.431	0.148	1.918	-0.228	-0.513	-0.895
PDE3A	-0.158	0.405	1.835	-0.71	-0.682	-0.689
PDE3B	-0.289	-0.137	2.012	-0.601	-0.523	-0.462
PDE4B	-0.815	-0.184	1.939	0.082	-0.432	-0.59
PDE4D	-0.53	-0.06	2.008	-0.562	-0.464	-0.392
PDE5A	-0.338	0.998	1.516	-0.756	-0.789	-0.631
PDGFC	-0.539	0.051	1.883	0.106	-0.642	-0.859
PDGFD	-0.339	0.448	1.827	-0.851	-0.672	-0.413
PDGFRA	-0.651	-0.062	1.979	-0.145	-0.506	-0.615
PDIK1L	-0.45	0.211	1.943	-0.641	-0.565	-0.497
PDP1	-0.377	0.365	1.874	-0.732	-0.704	-0.426
PDS5A	-0.359	0.34	1.882	-0.723	-0.71	-0.431
PDS5B	-0.414	0.539	1.807	-0.666	-0.75	-0.516
PDZD2	-0.605	-0.845	1.895	-0.567	0.054	0.067
PDZD8	-0.218	-0.115	1.986	-0.581	-0.33	-0.742
PEG10	-0.336	-0.298	1.98	-0.291	-0.183	-0.872
PELI1	-0.424	0.312	1.89	-0.604	-0.368	-0.805
PELI2	-0.382	0.277	1.917	-0.66	-0.552	-0.6
PER3	-0.379	0.685	1.725	-0.773	-0.519	-0.74
PEX3	-0.297	0.734	1.681	-0.827	-0.769	-0.522
PEX5L	-0.539	0.398	1.865	-0.69	-0.344	-0.691
PGAP1	-0.427	0.111	1.972	-0.578	-0.562	-0.517
PGGT1B	-0.339	0.536	1.802	-0.652	-0.777	-0.569
PGM2	-0.358	1.172	1.346	-1.001	-0.499	-0.659
PGM2L1	-0.524	0.052	1.977	-0.681	-0.48	-0.344
PGM3	-0.421	0.468	1.831	-0.826	-0.618	-0.433
PHACTR2	-0.433	0.475	1.844	-0.647	-0.598	-0.641
PHAX	-0.339	-0.198	2.019	-0.644	-0.465	-0.373
PHC3	-0.5	0.087	1.978	-0.483	-0.462	-0.62
PHF14	-0.344	0.277	1.902	-0.76	-0.408	-0.666
PHF20L1	-0.435	0.258	1.922	-0.684	-0.626	-0.435
PHF3	-0.325	0.394	1.84	-0.736	-0.834	-0.34
PHF6	-0.346	1.132	1.411	-0.695	-0.736	-0.765
PHIP	-0.286	0.705	1.636	-0.816	-1.015	-0.224
PHLDB2	-0.493	0.313	1.907	-0.693	-0.579	-0.454
PHTF2	-0.348	0.815	1.615	-0.859	-0.858	-0.366
PI4K2B	-0.233	0.092	1.923	-0.764	-0.772	-0.246
PIAS1	-0.436	0.646	1.753	-0.763	-0.695	-0.505
PIBF1	0.089	0.959	0.632	-1.377	-1.081	0.779
PICALM	-0.43	0.62	1.769	-0.667	-0.54	-0.751
PIGA	-0.375	0.372	1.878	-0.697	-0.67	-0.508
PIGK	-0.113	1.049	1.341	-0.977	-1.031	-0.269
PIK3C2A	-0.458	0.201	1.94	-0.659	-0.631	-0.393
PIK3CA	-0.327	0.04	1.948	-0.763	-0.686	-0.212
PIK3R1	-0.567	-0.137	2.017	-0.52	-0.451	-0.342
PIKFYVE	-0.476	0.418	1.87	-0.674	-0.54	-0.598
PJA2	-0.409	0.518	1.798	-0.808	-0.744	-0.354
PKD2	-0.411	-0.356	1.986	-0.543	0.006	-0.682
PKN2	-0.394	0.457	1.843	-0.691	-0.72	-0.495
PLA2G4A	-0.275	1.644	0.732	-0.924	-0.851	-0.326
PLAG1	-0.432	0.841	1.64	-0.779	-0.675	-0.596
PLCB1	-0.289	0.343	1.87	-0.719	-0.772	-0.434
PLCB4	-0.461	0.308	1.909	-0.698	-0.557	-0.5
PLEKHA1	-0.495	0.299	1.917	-0.632	-0.554	-0.535
PLEKHA5	-0.382	0.828	1.645	-0.697	-0.74	-0.654
PLEKHA8	-0.435	0.148	1.945	-0.796	-0.397	-0.465
PLEKHF2	-0.415	0.575	1.779	-0.816	-0.695	-0.428
PLEKHH2	-0.431	0.212	1.911	-0.894	-0.387	-0.411
PLK1S1	-0.53	0.647	1.644	-1.008	-0.763	0.01
PLK2	-1	-0.002	1.801	0.276	-0.313	-0.761
PLK4	-0.376	0.007	1.978	-0.662	-0.647	-0.299
PLOD2	-0.353	0.046	1.966	-0.626	-0.718	-0.316
PLP1	-0.427	-0.271	2.007	-0.441	-0.165	-0.703
PLS1	-0.361	1.04	1.486	-0.765	-0.784	-0.616
PLS3	-0.245	0.998	1.462	-0.965	-0.844	-0.406
PLXNC1	-0.597	-0.524	2.015	-0.461	-0.2	-0.233
PM20D2	-0.361	0.4	1.824	-0.706	-0.252	-0.906
PMAIP1	-0.454	0.141	1.932	-0.731	-0.68	-0.208
PMS1	-0.169	0.622	1.52	-1.005	-1.115	0.147
PNISR	-0.467	0.103	1.973	-0.593	-0.576	-0.44
PNN	-0.411	-0.211	2.026	-0.539	-0.531	-0.333
PNPLA8	-0.154	0.924	1.386	-0.934	-1.151	-0.071
PNPT1	-0.424	0.894	1.588	-0.64	-0.502	-0.916
PNRC2	-0.095	0.082	1.879	-0.838	-0.848	-0.18
POC1B	-0.154	1.053	1.374	-0.933	-0.996	-0.343
POC5	-0.403	0.596	1.748	-0.931	-0.667	-0.343
POLA1	-0.414	0.669	1.71	-0.666	-0.357	-0.942
POLI	-0.424	0.33	1.901	-0.638	-0.646	-0.523
POLK	-0.509	1.105	1.45	-0.785	-0.677	-0.585
POLQ	-0.434	-0.134	2.018	-0.603	-0.449	-0.397
POLR2B	-0.367	0.949	1.532	-0.758	-0.429	-0.927
POLR2M	-0.209	1.021	1.47	-0.822	-0.801	-0.66
POLR3F	-0.411	0.559	1.802	-0.697	-0.639	-0.614
POLR3G	-0.071	0.568	1.531	-0.99	-1.155	0.116
PON2	-0.211	0.458	1.786	-0.895	-0.802	-0.335
POSTN	-0.506	0.132	1.914	-0.905	-0.461	-0.174
POT1	-0.031	0.796	1.297	-1.123	-1.17	0.23
POU2F1	-0.41	-0.178	2.017	-0.567	-0.297	-0.567
POU4F1	-0.309	-0.669	1.987	-0.027	-0.605	-0.377
PPARGC1A	-0.712	0.098	1.961	-0.324	-0.587	-0.436
PPAT	-0.356	0.496	1.822	-0.727	-0.7	-0.536
PPIG	-0.261	0.525	1.689	-0.914	-0.983	-0.056
PPIL4	-0.152	0.373	1.758	-0.931	-0.932	-0.115
PPIP5K2	-0.311	0.949	1.506	-0.823	-0.964	-0.357
PPM1A	-0.552	-0.028	1.993	-0.35	-0.397	-0.665
PPM1B	-0.367	-0.025	1.99	-0.707	-0.376	-0.514
PPM1K	-0.459	0.37	1.85	-0.574	-0.282	-0.906
PPM1L	-0.307	0.079	1.914	-0.749	-0.126	-0.812
PPP1CB	-0.213	0.782	1.601	-0.766	-1.024	-0.38
PPP1R12A	-0.4	0.74	1.7	-0.735	-0.73	-0.575
PPP1R2	-0.119	0.565	1.639	-0.919	-1.06	-0.105
PPP1R3B	-0.798	-0.424	1.83	0.33	-0.092	-0.846
PPP1R9A	-0.427	0.168	1.953	-0.676	-0.515	-0.504
PPP2R3A	-0.447	0.333	1.882	-0.585	-0.361	-0.822
PPP2R3C	-0.399	0.723	1.619	-1.057	-0.75	-0.136
PPP2R5C	-0.413	0.609	1.776	-0.726	-0.596	-0.649
PPP3CA	-0.305	0.169	1.945	-0.652	-0.611	-0.545
PPP4R2	-0.378	0.525	1.809	-0.667	-0.773	-0.515
PPP4R4	-0.433	0.695	1.732	-0.695	-0.645	-0.654
PPP6R3	-0.4	0.802	1.648	-0.558	-0.581	-0.912
PPTC7	-0.398	-0.023	1.957	-0.424	-0.232	-0.882
PPWD1	-0.262	0.154	1.824	-0.867	-0.908	0.059
PRDM5	-0.44	0.47	1.846	-0.669	-0.615	-0.592
PREPL	-0.415	0.757	1.693	-0.719	-0.598	-0.717
PREX2	-0.408	0.157	1.949	-0.737	-0.528	-0.433
PRKAA1	-0.425	0.289	1.916	-0.587	-0.523	-0.67
PRKAA2	-0.415	0.275	1.889	-0.635	-0.272	-0.841
PRKACB	-0.323	0.319	1.871	-0.783	-0.757	-0.327
PRKAR2B	-0.228	0.678	1.712	-0.701	-0.748	-0.713
PRKCI	-0.497	0.346	1.892	-0.689	-0.407	-0.644
PRKD3	-0.469	0.495	1.835	-0.701	-0.539	-0.621
PRKG1	-0.343	0.422	1.803	-0.762	-0.91	-0.212
PRKG2	-0.454	-0.044	1.996	-0.697	-0.409	-0.392
PRKRIR	-0.255	0.731	1.665	-0.835	-0.852	-0.453
PRLR	-0.494	0.642	1.757	-0.747	-0.463	-0.696
PRMT3	-0.28	0.991	1.513	-0.743	-0.723	-0.759
PROM1	-0.658	-0.288	1.965	-0.218	-0.043	-0.758
PRORSD1P	-0.547	0.092	1.782	0.314	-1.012	-0.628
PROS1	-0.37	-0.192	2.02	-0.624	-0.489	-0.346
PROX1	-0.343	-0.052	1.993	-0.356	-0.557	-0.685
PRPF18	-0.184	-0.014	1.918	-0.83	-0.762	-0.128
PRPF38B	-0.283	0.117	1.923	-0.739	-0.779	-0.239
PRPF39	-0.31	0.309	1.871	-0.679	-0.857	-0.334
PRPF40A	-0.204	0.753	1.578	-0.891	-1.033	-0.203
PRPF4B	-0.284	0.666	1.703	-0.751	-0.911	-0.423
PRPS2	-0.247	0.863	1.579	-0.517	-0.729	-0.949
PRR14L	-0.366	0.002	1.951	-0.538	-0.193	-0.855
PRRC1	-0.396	0.34	1.895	-0.66	-0.531	-0.648
PRRC2C	-0.433	-0.307	1.995	-0.225	-0.235	-0.794
PRRG4	-0.145	-0.384	1.802	0.307	-0.443	-1.137
PRSS35	-0.107	0.869	1.423	-0.157	-0.764	-1.264
PRTG	-0.38	-0.014	1.999	-0.558	-0.505	-0.542
PRUNE2	-0.447	0.349	1.817	-0.635	-0.103	-0.981
PSD3	-0.481	0.288	1.915	-0.712	-0.529	-0.481
PSIP1	-0.228	0.27	1.871	-0.649	-0.91	-0.353
PSMA2	-0.161	0.774	1.542	-1.081	-0.892	-0.182
PSMA3	0.166	0.23	1.224	-1.275	-1.104	0.759
PSMC6	0.026	0.826	1.24	-1.162	-1.171	0.241
PSMD12	-0.248	0.405	1.85	-0.684	-0.719	-0.604
PSME4	-0.343	0.387	1.808	-0.724	-0.175	-0.953
PTAR1	-0.432	0.273	1.918	-0.66	-0.656	-0.442
PTBP2	-0.342	0.49	1.806	-0.671	-0.873	-0.41
PTBP3	-0.435	0.349	1.895	-0.675	-0.575	-0.558
PTCH1	-0.26	-0.575	1.928	-0.212	0.034	-0.915
PTCHD1	-0.389	-0.614	2.005	-0.375	-0.073	-0.554
PTEN	-0.092	0.392	1.753	-0.912	-0.945	-0.197
PTER	-0.351	0.614	1.76	-0.83	-0.58	-0.612
PTGR2	-0.525	0.424	1.751	-0.615	0.016	-1.049
PTPLAD2	-0.568	0.075	1.959	-0.749	-0.451	-0.264
PTPLB	-0.42	0.795	1.63	-0.653	-0.363	-0.989
PTPN11	-0.428	0.134	1.956	-0.734	-0.501	-0.427
PTPN12	-0.385	0.564	1.797	-0.706	-0.656	-0.614
PTPN13	-0.423	0.217	1.937	-0.699	-0.521	-0.511
PTPN4	-0.361	0.337	1.895	-0.634	-0.614	-0.622
PTPRD	-0.455	0.306	1.859	-0.71	-0.155	-0.845
PTPRG	-0.438	-0.177	2	-0.487	-0.187	-0.71
PTPRG-AS1	-0.57	0.543	1.803	-0.72	-0.363	-0.692
PTPRK	-0.43	0.228	1.836	-0.428	-0.111	-1.095
PTPRZ1	-0.451	0.408	1.868	-0.65	-0.467	-0.708
PUM2	-0.367	0.578	1.785	-0.701	-0.557	-0.738
PURB	-0.352	-0.286	1.992	-0.367	-0.173	-0.813
PURG	-0.345	-0.306	2.028	-0.443	-0.323	-0.611
PUS10	-0.461	1.065	1.461	-0.718	-0.457	-0.89
PUS7L	-0.251	0.671	1.627	-0.933	-0.975	-0.139
PVRL3	-0.115	0.498	1.685	-0.886	-1.047	-0.136
PYGO1	-0.395	-0.22	2.022	-0.506	-0.303	-0.599
PYROXD1	-0.199	0.667	1.58	-1.054	-0.953	-0.041
QKI	-0.357	0.373	1.88	-0.635	-0.657	-0.604
QSER1	-0.384	-0.03	2.001	-0.591	-0.535	-0.461
R3HCC1L	-0.519	0.054	1.928	-0.864	-0.095	-0.505
R3HDM1	-0.525	-0.296	1.917	-0.146	0.019	-0.969
RAB11FIP2	-0.399	0.365	1.882	-0.674	-0.697	-0.477
RAB12	-0.546	-0.257	1.92	0.153	-0.387	-0.882
RAB18	-0.342	0.325	1.829	-0.845	-0.837	-0.131
RAB1A	-0.668	0.32	1.851	-0.377	-0.213	-0.915
RAB21	-0.407	-0.02	1.997	-0.501	-0.421	-0.648
RAB23	-0.197	-0.073	1.907	-0.949	-0.647	-0.041
RAB27A	-0.597	-0.042	1.959	-0.47	-0.092	-0.758
RAB33B	-0.461	0.676	1.732	-0.565	-0.526	-0.856
RAB39A	-0.129	0.777	1.627	-0.833	-0.703	-0.738
RAB3GAP1	-0.342	0.309	1.864	-0.912	-0.288	-0.631
RAB3GAP2	-0.483	0.606	1.774	-0.702	-0.444	-0.75
RAB3IP	-0.478	0.12	1.95	-0.76	-0.287	-0.544
RAB5A	-0.386	-0.042	1.963	-0.762	-0.628	-0.144
RAB8B	-0.321	0.668	1.713	-0.813	-0.818	-0.43
RABEP1	-0.25	0.249	1.888	-0.777	-0.765	-0.346
RABGAP1L	-0.373	1.218	1.326	-0.784	-0.545	-0.842
RABGGTB	-0.399	0.312	1.882	-0.774	-0.712	-0.309
RABL3	-0.537	0.499	1.799	-0.789	-0.228	-0.744
RAD17	-0.256	0.145	1.884	-0.818	-0.824	-0.131
RAD18	-0.419	0.832	1.641	-0.82	-0.674	-0.56
RAD21	-0.35	0.917	1.578	-0.747	-0.766	-0.632
RAD50	-0.325	0.689	1.686	-0.877	-0.832	-0.341
RAD51AP1	-0.169	1.09	1.292	-0.995	-1.047	-0.17
RAD54B	-0.281	0.842	1.587	-0.816	-0.93	-0.403
RAI14	-0.498	0.504	1.831	-0.651	-0.491	-0.694
RALGAPA1	-0.439	0.41	1.864	-0.734	-0.448	-0.652
RALGPS2	-0.388	0.697	1.725	-0.731	-0.692	-0.612
RANBP17	-0.317	0.764	1.664	-0.706	-0.527	-0.878
RANBP2	-0.392	0.145	1.95	-0.652	-0.672	-0.378
RANBP6	-0.344	0.187	1.923	-0.723	-0.724	-0.319
RAP1B	-0.346	0.523	1.792	-0.898	-0.616	-0.455
RAP2A	-0.283	0.169	1.924	-0.697	-0.759	-0.354
RAP2C	-0.431	0.547	1.804	-0.57	-0.569	-0.782
RAPGEF2	-0.363	-0.355	2.017	-0.655	-0.183	-0.461
RAPGEF6	-0.447	0.345	1.893	-0.733	-0.563	-0.494
RAPH1	-0.737	-0.551	1.927	0.061	-0.041	-0.658
RASA1	-0.384	-0.074	2.005	-0.627	-0.53	-0.39
RASA2	-0.328	0.912	1.579	-0.729	-0.785	-0.648
RASAL2	-0.537	-0.182	1.995	-0.443	-0.138	-0.695
RASEF	-0.171	0.125	1.936	-0.719	-0.531	-0.64
RASGEF1B	-0.364	-0.003	1.99	-0.45	-0.677	-0.497
RASSF8	-0.341	-0.123	2.003	-0.645	-0.592	-0.302
RAVER2	-0.409	-0.007	1.956	-0.565	-0.16	-0.815
RB1	-0.417	0.565	1.789	-0.759	-0.721	-0.457
RB1CC1	-0.189	0.835	1.502	-0.908	-1.078	-0.162
RBAK	-0.32	-0.166	2.011	-0.608	-0.595	-0.322
RBBP6	-0.358	-0.087	2.011	-0.524	-0.54	-0.503
RBBP8	-0.27	0.65	1.677	-0.938	-0.865	-0.254
RBL1	-0.489	0.191	1.946	-0.603	-0.402	-0.643
RBM11	-0.101	1.049	1.19	-1.046	-1.172	0.079
RBM12B	-0.235	-0.147	1.99	-0.784	-0.351	-0.474
RBM25	-0.33	0.236	1.91	-0.621	-0.804	-0.392
RBM26	-0.373	0.297	1.909	-0.662	-0.618	-0.553
RBM27	-0.377	1.01	1.514	-0.666	-0.689	-0.792
RBM39	-0.241	0.573	1.74	-0.793	-0.902	-0.378
RBM41	-0.419	0.245	1.91	-0.792	-0.327	-0.617
RBM43	-0.423	0.008	1.991	-0.403	-0.539	-0.635
RBM44	-0.379	-0.15	2.018	-0.506	-0.599	-0.384
RBM45	-0.24	1.134	1.351	-0.975	-0.829	-0.44
RBM7	-0.392	0.56	1.769	-0.799	-0.812	-0.326
RBMS1	-0.497	0.14	1.965	-0.475	-0.533	-0.601
RBPJ	-0.491	0.466	1.842	-0.783	-0.519	-0.515
RC3H1	-0.47	0.253	1.929	-0.656	-0.488	-0.569
RC3H2	-0.393	0.195	1.943	-0.646	-0.628	-0.471
RCAN3	-0.752	-0.462	1.859	0.339	-0.206	-0.778
RCBTB1	-0.305	0.638	1.708	-0.587	-0.424	-1.03
RCHY1	-0.256	0.809	1.542	-1.024	-0.91	-0.161
RCN2	-0.138	0.835	1.575	-0.784	-0.948	-0.54
RCOR3	-0.478	-0.167	2.022	-0.352	-0.46	-0.564
RDX	-0.473	0.534	1.814	-0.745	-0.61	-0.521
RECQL	-0.289	0.138	1.896	-0.738	-0.858	-0.149
REEP3	-0.349	0.127	1.924	-0.759	-0.734	-0.208
REL	-0.448	-0.236	1.976	-0.675	0.002	-0.619
RELL1	-0.564	0.004	1.866	0.037	-0.286	-1.058
REST	-0.468	0.031	1.992	-0.568	-0.496	-0.492
REV1	-0.416	0.573	1.773	-0.747	-0.369	-0.814
REV3L	-0.35	-0.022	1.989	-0.675	-0.576	-0.367
RFC1	-0.398	0.518	1.821	-0.66	-0.647	-0.635
RFC3	-0.304	0.628	1.746	-0.654	-0.834	-0.583
RFK	-0.418	0.269	1.909	-0.812	-0.444	-0.503
RFX3	-0.35	0.591	1.77	-0.848	-0.579	-0.584
RFX7	-0.394	0.046	1.986	-0.537	-0.509	-0.593
RGPD2	-0.471	0.243	1.923	-0.675	-0.663	-0.356
RGPD8	-0.44	0.269	1.918	-0.707	-0.613	-0.427
RGS17	-0.262	0.465	1.822	-0.79	-0.683	-0.552
RGS2	-0.415	0.904	1.556	-1.013	-0.636	-0.396
RGS5	-0.467	0.287	1.912	-0.677	-0.643	-0.413
RGS7BP	-0.454	-0.078	2.011	-0.572	-0.407	-0.501
RHOB	-1.182	-0.265	1.667	0.592	-0.213	-0.599
RHOBTB3	-0.303	0.174	1.736	-0.103	-0.151	-1.353
RHOQ	-0.291	-0.005	1.982	-0.571	-0.7	-0.415
RHOT1	-0.193	1.15	1.358	-0.829	-0.796	-0.69
RIC3	-0.622	0.27	1.902	-0.455	-0.305	-0.79
RICTOR	-0.357	0.47	1.805	-0.683	-0.904	-0.331
RIF1	-0.262	0.336	1.813	-0.749	-0.971	-0.167
RIMKLB	-0.486	-0.302	2.031	-0.474	-0.267	-0.502
RIMS1	-0.427	-0.342	2.03	-0.439	-0.253	-0.569
RIMS2	-0.429	-0.03	2	-0.586	-0.394	-0.561
RIOK1	-0.434	0.389	1.871	-0.668	-0.432	-0.726
RIOK2	-0.168	0.291	1.684	-1.016	-0.989	0.197
RIT2	-0.249	1.386	1.07	-0.472	-0.602	-1.134
RLF	-0.393	0.32	1.901	-0.693	-0.619	-0.516
RLIM	-0.503	0.148	1.964	-0.581	-0.495	-0.532
RMDN2	-0.332	0.87	1.377	-0.896	-1.186	0.168
RMI1	-0.389	0.366	1.875	-0.706	-0.723	-0.422
RMND5A	-0.403	-0.33	1.992	-0.587	-0.025	-0.646
RMST	-0.37	0.689	1.585	-0.144	-0.488	-1.271
RND3	-0.202	0.215	1.773	-0.881	-0.992	0.087
RNF103	-0.381	-0.861	1.913	0.042	-0.04	-0.673
RNF128	-0.152	-0.245	2.009	-0.49	-0.631	-0.492
RNF13	-0.19	0.83	1.545	-0.947	-0.956	-0.282
RNF138	-0.13	0.569	1.672	-0.869	-1.03	-0.213
RNF141	-0.513	0.129	1.965	-0.632	-0.407	-0.542
RNF146	-0.327	-0.35	2.024	-0.585	-0.235	-0.527
RNF152	-0.499	-0.461	2.035	-0.269	-0.388	-0.418
RNF168	-0.359	-0.183	1.999	-0.514	-0.215	-0.727
RNF170	-0.465	0.828	1.619	-0.956	-0.377	-0.648
RNF180	-0.376	0.221	1.831	-0.844	-0.862	0.031
RNF182	-0.801	-0.341	1.802	0.468	-0.301	-0.827
RNF19A	-0.39	0.122	1.96	-0.689	-0.418	-0.585
RNF2	-0.165	0.583	1.693	-0.781	-1.035	-0.295
RNF217	-0.521	-0.231	2.029	-0.441	-0.331	-0.504
RNF219	-0.2	0.312	1.827	-0.809	-0.907	-0.224
RNF38	-0.543	-0.336	1.971	-0.036	-0.252	-0.803
RNF6	-0.34	-0.022	1.99	-0.653	-0.591	-0.384
RNGTT	-0.207	1.074	1.406	-0.935	-0.841	-0.496
RNMT	-0.314	0.618	1.751	-0.794	-0.753	-0.508
RNPC3	-0.503	0.121	1.964	-0.658	-0.544	-0.379
ROBO1	-0.394	-0.098	1.984	-0.427	-0.258	-0.807
ROCK1	-0.167	-0.027	1.907	-0.771	-0.855	-0.087
ROCK2	-0.413	-0.166	2.024	-0.554	-0.486	-0.404
ROR1	-0.304	0.121	1.959	-0.543	-0.574	-0.658
RORA	-0.404	0.166	1.954	-0.595	-0.623	-0.497
RORB	-0.059	0.416	1.797	-0.868	-0.563	-0.722
RP1-193H18.2	-0.433	-0.236	2.017	-0.618	-0.509	-0.22
RP1-228H13.5	-0.395	0.303	1.894	-0.609	-0.395	-0.799
RP1-39G22.7	-0.31	0.587	1.77	-0.69	-0.795	-0.563
RP2	-0.367	0.541	1.778	-0.96	-0.499	-0.493
[truncated: 958 more rows]
