# Supplementary material for: WNT signaling memory is required for ACTIVIN to function as a morphogen in human gastruloids
Source: eLife. 2018 Oct 12;7:e38279. doi: 10.7554/eLife.38279 (PMC6234031; doi:10.7554/eLife.38279)
Supplement: Figure 4—source data 2. [file elife-38279-fig4-data2.xlsx]

## Sheet: Group 2
	read count z-score
Gene	0 h	1 h	2.5 h	4 h	8 h	12 h
ABCD1	-0.851	-0.963	-0.851	0.592	1.289	0.783
ABHD12B	-0.792	-0.652	-0.668	-0.268	0.644	1.736
ABLIM2	-0.303	-0.674	-1.112	-0.05	1.751	0.387
ABTB2	-0.657	-1.092	-0.78	1.489	0.584	0.458
AC007319.1	-0.928	-1.175	-0.498	1.001	1.138	0.461
AC009005.2	-0.509	-0.33	-0.603	-0.425	-0.148	2.016
AC066593.1	-0.439	-0.86	-1.046	-0.039	0.938	1.446
AC138035.2	-0.946	-1.27	0.937	0.371	1.184	-0.275
ACHE	-0.815	-1.063	-0.695	0.564	1.445	0.564
ACKR3	-1.376	-0.89	0.967	0.911	0.682	-0.293
ADAM19	-0.768	-1.181	-0.687	0.579	1.244	0.813
ADAMTS14	-0.331	-1.026	-0.298	-0.473	1.858	0.271
ADAP2	-0.429	-0.362	-1.074	-0.182	0.184	1.862
ADD1	-0.615	-0.852	-1.006	0.075	1.216	1.183
AF003625.3	-0.82	-1.217	-0.111	0.628	1.561	-0.041
AGO1	-0.944	-1.482	0.596	0.542	1.11	0.177
AGRN	-0.271	-0.954	-1.088	1.608	0.365	0.34
AL627309.1	-1.085	-0.971	-0.174	0.023	1.557	0.65
ALDH16A1	0.186	-0.357	-1.727	0.712	0.026	1.161
ALG1L7P	-0.518	-0.555	-0.507	-0.882	0.806	1.656
ALKBH7	0.093	0.361	-1.756	0.558	-0.4	1.144
AMH	-1.008	-1.137	0.733	1.113	-0.511	0.809
ANKRD9	-0.059	-0.581	-1.375	0.2	0.171	1.643
AP000688.29	-1.282	-1.085	0.68	0.022	1.239	0.426
ARC	1.362	-0.045	-1.535	-0.633	0.321	0.531
ARHGAP33	-0.754	-0.712	-1.058	0.544	1.514	0.466
ARID5A	-0.3	-0.713	-1.073	-0.199	0.595	1.69
ARSE	-0.554	-0.803	-1.039	-0.015	1.024	1.386
ASAP3	-0.476	-1.1	-0.982	0.339	1.003	1.215
ASIC2	-0.883	-0.887	-0.871	0.888	1.295	0.458
ATP1B2	-0.581	-1.059	0.031	1.872	-0.135	-0.129
ATP5D	0.135	0.577	-1.55	0.748	-0.872	0.963
B3GNT7	-0.062	-0.908	-1.178	0.361	0.167	1.62
BAD	0.336	0.815	-1.437	0.444	-1.066	0.907
BAIAP3	-0.846	-0.351	-1.094	0.536	0.123	1.631
BAMBI	-1.229	-1	1.214	0.992	0.13	-0.107
BCL3	-0.777	-1.172	-0.387	0.907	1.432	-0.004
BCL6B	1.579	-0.08	-1.495	-0.361	-0.008	0.365
BGN	-0.714	-0.81	-0.505	0.714	1.707	-0.393
BMP4	-1.119	-0.915	0.349	0.302	1.625	-0.241
C11orf31	-0.155	0.992	-1.544	0.883	-0.725	0.55
C19orf24	0.125	0.564	-1.148	0.789	-1.32	0.991
C19orf26	-0.779	-1.408	-0.351	1.131	0.606	0.801
C19orf57	-0.123	-0.929	-0.694	-0.175	1.9	0.022
C1orf61	-0.47	-1.011	1.064	1.362	-0.071	-0.874
C1orf95	-0.453	-1.42	-0.202	0.073	1.605	0.397
C1QL1	-0.644	-0.799	-1.125	0.401	0.79	1.377
C21orf2	-0.308	-1.259	-0.888	1.403	0.594	0.458
C2CD4C	-0.721	-0.525	-0.804	1.76	-0.311	0.602
C9orf142	0.179	0.482	-1.395	0.78	-1.067	1.021
CACNA1C-AS2	-0.894	0.152	-1.168	-0.35	1.392	0.868
CACNG4	-0.593	-1.134	-0.789	1.483	0.575	0.458
CAPS	-0.19	-0.412	-0.949	0.01	1.934	-0.392
CASKIN1	0.191	-0.458	-0.962	-0.514	-0.14	1.883
CBLN1	-0.825	-0.834	-0.055	1.887	0.064	-0.237
CBR1	-0.588	-0.647	-1.123	-0.068	1.089	1.336
CBR3	-0.792	-0.836	-0.99	0.367	1.011	1.24
CCDC177	-1.067	-0.969	-0.486	1.283	0.248	0.99
CCDC3	-0.434	-0.7	-1.257	0.757	0.171	1.462
CCDC78	-0.366	-0.527	-0.754	-0.889	1.195	1.341
CCDC85B	-0.014	0.237	-1.867	0.286	0.203	1.155
CCDC87	0.446	0.053	-1.285	-0.534	-0.338	1.658
CCKBR	-0.788	-0.988	-0.831	0.459	1.386	0.762
CD1D	-0.614	-1.222	-0.731	0.661	0.538	1.367
CDA	-0.735	-0.751	-0.877	-0.045	0.867	1.54
CDC42EP2	0.885	-0.158	-1.475	-0.522	-0.05	1.319
CDC42EP4	-0.543	-1.284	-0.225	1.701	0.018	0.333
CDH6	-1.118	-1.127	0.758	1.204	0.597	-0.314
CDKN1C	-0.829	-1.076	-0.353	1.479	-0.13	0.909
CER1	-1.162	-1.011	0.972	1.267	0.161	-0.228
CHAD	-0.926	-0.894	-0.276	1.238	1.255	-0.397
CHD5	-0.593	-1.09	-0.708	0.343	1.634	0.414
CHRNB4	-0.34	-0.909	-0.933	-0.304	1.198	1.288
CHST12	0.467	0.179	-1.278	0.949	-1.199	0.881
CHST15	-0.79	-1.152	-0.031	1.716	0.313	-0.056
CILP2	-0.45	-0.999	-0.998	1.504	0.253	0.691
CISH	-0.834	-1.204	-0.567	0.449	1.018	1.138
COL22A1	-0.45	-1.155	-0.71	-0.029	1.495	0.85
COL27A1	-0.539	-1.45	0.025	0.054	1.579	0.331
COL9A2	-0.848	-1.328	-0.382	0.599	1.195	0.763
COMTD1	-0.336	0.114	-1.295	1.139	-0.767	1.145
CORO2A	-0.986	-1.088	-0.487	0.354	1.25	0.958
CRIP2	-0.48	-0.512	-1.206	0.486	1.678	0.034
CROCC	-0.612	-1.138	-0.624	0.012	1.459	0.903
CRYBB1	-0.205	-0.198	-1.485	0.325	-0.05	1.614
CRYGD	-0.675	-0.555	-0.786	0.687	1.728	-0.399
CRYGEP	-0.461	0.096	-1.491	1.037	-0.346	1.166
CSF1R	-0.867	-0.841	-0.505	1.409	1.101	-0.296
CST1	-0.517	-0.495	-1.032	-0.455	1.466	1.034
CTB-171A8.1	-0.848	-1.058	-0.753	0.642	0.734	1.282
CTB-43E15.3	-1.301	-1.255	0.62	0.682	0.845	0.41
CTC-338M12.9	-0.659	-0.799	0.996	0.173	1.341	-1.052
CTC-479C5.16	-0.983	-1.298	0.339	1.051	1.051	-0.161
CTD-2231H16.1	-0.299	-0.52	-1.075	1.078	-0.59	1.405
CTD-2270L9.4	-0.109	1.521	-1.019	-0.083	-1.045	0.734
CTD-2630F21.1	-0.317	-0.734	-1.084	0.12	1.763	0.252
CTD-3193O13.9	-0.514	0.067	-0.103	1.405	0.664	-1.519
CTSK	-0.637	0.036	-0.851	-0.76	0.454	1.757
CTXN1	-0.173	0.231	-1.597	1.084	-0.51	0.965
CXCR4	-1.344	-0.637	-0.39	0.952	1.311	0.108
CYP2B6	-0.38	-0.68	-0.783	-0.512	0.568	1.788
DAAM2	-0.534	-0.7	-0.825	-0.506	1.267	1.297
DACT1	-1.362	-0.995	0.853	-0.122	1.025	0.601
DDAH2	-0.485	-0.222	-1.434	0.412	0.161	1.569
DISP2	-0.634	-0.344	-0.549	-0.516	1.977	0.067
DLG5-AS1	-1.031	-0.657	-0.984	1.196	0.825	0.652
DMBX1	-0.625	-0.897	0.39	1.817	-0.584	-0.101
DPP7	-0.303	-0.481	-1.208	0.328	-0.098	1.761
DRD2	-0.172	-0.485	-0.543	0.739	-1.146	1.607
EFNA2	-0.592	-1.09	-0.921	0.65	0.598	1.355
ELOVL2	-1.3	-0.755	1.422	0.614	0.422	-0.404
EMILIN3	-0.467	-1.043	-0.98	1.052	0.174	1.263
ENG	-0.274	-0.627	-1.142	-0.196	1.704	0.535
ERVH48-1	-1.019	-1.068	-0.273	0.885	1.399	0.075
ESPN	-0.853	-0.911	-0.838	1.003	0.322	1.277
ESPNP	-0.648	-0.7	1.115	1.449	-0.539	-0.677
ETS2	-1.287	-1.191	0.879	0.866	0.624	0.109
EVA1C	-0.872	-0.281	-0.269	0.167	-0.651	1.907
FAM157A	-1.192	-1.088	0.125	0.568	1.425	0.162
FAM157C	-0.996	-1.048	-0.081	0.141	1.669	0.315
FAM167A	-0.808	-1.011	0.001	1.734	0.44	-0.356
FAM173A	-0.382	0.184	-1.844	0.817	0.622	0.603
FAM184B	-0.671	-0.635	0.068	1.624	0.653	-1.039
FAM195A	0.207	0.445	-1.499	0.323	-0.803	1.327
FAM20A	-0.661	-1.041	0.488	1.733	-0.033	-0.485
FAM20C	-0.678	-1.006	-0.862	1.372	0.261	0.913
FAM43B	-0.572	-1.273	-0.785	0.594	0.947	1.089
FAM50B	0.331	0.302	-1.219	0.786	-1.257	1.057
FAM65A	-0.568	-0.967	-0.721	-0.255	1.306	1.204
FBLN2	-0.349	-0.999	-1.045	0.177	0.72	1.496
FBRS	-0.321	-0.814	-1.243	0.188	1.453	0.736
FCGBP	-0.296	-0.435	-1.442	0.127	1.54	0.506
FGF18	-0.744	-1.107	0.312	1.726	-0.345	0.157
FGFR3	-0.514	-0.701	0.326	1.899	-0.615	-0.393
FGFR4	-0.112	-0.395	-1.426	0.277	0.008	1.649
FGFRL1	-0.713	-1.231	-0.723	0.915	0.677	1.075
FIBCD1	-0.106	-0.493	-1.409	0.393	0	1.615
FLI1	-0.865	-0.573	1.06	1.349	0.018	-0.99
FOXO4	-0.895	-0.914	-0.711	1.524	0.353	0.642
FOXQ1	-1.025	-0.934	-0.521	0.358	1.522	0.6
FRAT1	-0.703	-1.034	-0.675	0.01	1.42	0.982
FREM1	-1.005	-0.957	1.104	0.506	1.052	-0.7
FRMPD3	-0.453	-1.062	-0.512	1.086	1.415	-0.473
FURIN	-0.697	-1.224	-0.704	1.26	0.722	0.643
GABRE	-0.88	-0.699	1.078	0.675	0.938	-1.113
GAL3ST1	-0.617	-0.813	-1.053	0.478	0.451	1.555
GALNT10	-0.712	-0.915	-0.857	0.301	1.563	0.621
GAS2L1	-0.912	-1.002	-0.726	1.314	0.54	0.786
GCHFR	-0.733	0.177	-1.546	0.506	0.292	1.303
GDF3	-0.743	-0.776	-0.942	0.066	0.991	1.404
GET4	-0.619	-1.129	0.161	0.107	1.791	-0.31
GIPC3	-0.486	-0.821	-0.668	0.077	-0.009	1.907
GJA4	-0.525	-0.463	-1.366	0.07	1.021	1.264
GJB3	-0.891	-0.143	-0.907	1.832	0.033	0.076
GLTPD1	0.065	-0.593	-1.657	0.639	0.391	1.156
GMIP	-0.49	-0.964	-1.064	0.239	0.983	1.295
GNA14	-1.083	-1.058	-0.481	0.667	1.225	0.729
GNB1L	-0.023	-0.226	-1.38	1.144	-0.656	1.141
GPER	-0.889	-0.612	0.258	1.865	-0.091	-0.531
GPR153	0.12	-0.443	-0.745	0.44	-1.073	1.7
GPR50	-0.929	-1.241	0.065	1.026	1.231	-0.153
GPX1	-0.153	1.01	-1.654	0.672	-0.555	0.679
GPX1P1	0.012	0.485	-1.598	0.732	-0.711	1.081
GRAMD4	-0.388	-0.954	-1.164	0.372	0.778	1.357
GRM2	-0.558	-1.255	-0.016	1.764	0.038	0.028
GSTT2	-0.66	-0.945	-0.849	0.028	1.152	1.273
HAGHL	-0.7	-0.375	-1.31	0.091	1.066	1.228
HCN2	-0.649	-0.577	-1.216	0.705	0.253	1.485
HELZ2	-0.327	-0.866	-1.215	0.15	0.912	1.346
HEY1	-1.334	-1.187	0.972	0.646	0.598	0.304
HEY2	-1.09	-1.001	0.566	-0.39	1.458	0.459
HEYL	-0.45	-0.888	-1.087	1.536	0.633	0.256
HHIP	-1.312	-0.987	0.369	1.009	1.063	-0.141
HID1	-0.292	-0.962	-0.778	0.351	-0.121	1.802
HOXD-AS1	-0.939	-1.041	-0.504	1.025	1.305	0.154
HTRA1	-0.55	-0.956	-0.92	0.1	0.832	1.495
ICOSLG	-0.36	-1.248	-0.503	1.541	-0.226	0.796
ID1	-1.248	-0.722	0.781	1.504	-0.126	-0.189
IL23A	-0.118	-0.555	-1.079	-0.358	1.816	0.295
IL34	0.036	-0.2	-0.529	0.722	-1.456	1.427
IL6R	-0.669	-1.058	-0.603	0.252	1.69	0.388
IQSEC2	-0.666	-0.916	-0.696	-0.236	1.347	1.167
ISG15	0.46	0.871	-1.752	0.043	-0.476	0.854
ITGB5	-0.709	-0.962	-0.775	0.041	1.006	1.399
JAG2	-0.175	-0.586	-0.849	0.443	-0.646	1.814
JUN	-0.894	-1.035	-0.533	0.841	1.453	0.168
JUNB	-0.39	-0.809	-0.941	1.622	-0.263	0.781
JUND	-0.733	-0.951	-0.865	1.328	0.221	1
KAZN	-0.688	-1.171	-0.544	0.229	1.557	0.617
KCNC3	-0.958	-1.088	0.408	1.297	0.875	-0.534
KCNC4	-0.489	-1.294	-0.823	0.962	0.564	1.08
KCNK12	0.023	0.011	-1.606	0.058	-0.041	1.554
KCP	-0.675	-0.541	-1.336	1.167	0.962	0.423
KIAA1161	-0.955	-1.145	-0.553	0.6	1.058	0.995
KIFC3	-0.838	-1.146	-0.644	1.125	1.047	0.456
LAMA5	-0.766	-1.148	-0.565	1.34	0.977	0.162
LBH	-0.857	-0.852	-0.87	0.246	1.198	1.135
LBP	-1.043	-0.915	-0.497	1.55	0.539	0.365
LDB3	-0.723	-0.849	-0.292	-0.216	1.894	0.187
LDLRAD4	-0.886	-1.039	0.112	-0.548	1.312	1.049
LEFTY1	-1.133	-1.058	-0.352	1.255	0.828	0.46
LEFTY2	-0.976	-0.957	-0.607	0.751	1.441	0.348
LINC00085	-0.82	-0.451	0.363	1.35	0.797	-1.239
LINC00116	-0.013	1.314	-1.281	0.455	-1.047	0.572
LINC00265	-0.991	-0.279	1.079	0.823	0.658	-1.291
LINC00886	-1.05	0.037	0.698	1.531	-0.205	-1.011
LINC00963	-0.483	-0.837	-0.29	1.978	-0.145	-0.222
LMX1B	-0.151	-0.958	0.814	1.561	-0.915	-0.35
LPPR3	-0.686	-0.755	-1.243	0.85	0.982	0.852
LRFN1	-0.153	-0.612	-1.173	1.222	-0.501	1.217
LRFN4	-0.461	-0.576	-1.462	1.23	0.605	0.664
LRP3	-0.156	-0.126	-1.592	0.774	-0.233	1.331
LRP4	-0.913	-1.286	-0.351	0.594	1.225	0.731
LRRC15	-0.467	-1.102	0.645	1.19	0.789	-1.055
LRRC3	-0.611	-1.103	-0.879	0.539	0.679	1.374
LRRC38	-0.565	-0.466	0.296	1.917	-0.559	-0.623
LRRC3DN	-0.516	-1.203	-0.945	0.811	0.825	1.028
LRRN2	-0.933	-0.952	-0.726	1.325	0.882	0.403
LTBP3	-0.527	-1.12	-0.588	0.219	1.731	0.284
LTBP4	-0.519	-0.807	-1.254	0.662	0.62	1.298
LYPD1	-0.98	-0.917	-0.191	1.749	0.323	0.016
MAMDC4	-0.494	-0.97	-0.907	0.223	1.639	0.509
MAML3	-0.929	-1.044	-0.367	-0.03	1.412	0.958
MAMSTR	0.93	0.847	-1.271	-1.104	-0.151	0.75
MAN1C1	-0.475	-1.134	-0.806	0.177	1.509	0.728
MANEAL	-0.549	-1.08	-0.967	1.327	0.758	0.511
MAP1LC3A	0.658	0.844	-1.522	0.176	-0.943	0.786
MAP3K10	-0.183	-0.964	-0.958	-0.335	1.347	1.093
MAPK15	-1.079	-1.238	-0.05	0.592	1.319	0.456
MBLAC1	-0.379	-0.831	-0.475	0.883	-0.791	1.592
MCHR1	-0.902	-1.03	-0.776	1.028	1.009	0.67
MDFI	-0.942	-0.793	-0.819	0.91	0.26	1.384
METRN	-0.401	-0.543	-1.529	0.878	1.083	0.511
METTL7A	-0.797	-0.979	-0.548	-0.147	1.105	1.366
MEX3D	-0.216	-0.935	-1.135	0.156	0.567	1.563
MFAP4	-0.776	-0.919	-0.917	0.334	1.087	1.191
MIF	0.001	0.852	-1.72	0.495	-0.521	0.893
MIXL1	-1.265	-1.178	0.209	1.081	0.837	0.316
MLXIP	-0.693	-1.138	-0.756	0.372	1.283	0.932
MMP2	-0.479	-0.984	-0.983	0.128	0.903	1.416
MMP9	-0.78	-0.744	-0.748	-0.219	0.992	1.499
MRC2	-0.424	-1.096	-1.026	0.399	0.849	1.299
MRPL12	-0.014	0.421	-1.551	0.691	-0.732	1.185
MRPS6	-0.529	-0.189	-1.401	-0.164	0.935	1.349
MSC	-0.86	-1.21	-0.356	0.321	1.472	0.632
MSX2	-0.569	-0.698	1.246	1.141	0.034	-1.155
MT-TQ	-0.589	-1.523	0.32	-0.154	1.37	0.576
MT-TS1	-0.739	-1.555	0.589	-0.076	1.111	0.67
MTFP1	0.133	0.508	-1.035	0.953	-1.417	0.858
MUC3A	-0.868	-0.929	-0.874	0.666	0.711	1.293
MUC4	-0.859	-1.297	1.063	0.395	1.074	-0.375
MXD4	-0.519	-0.81	-1.042	0.378	0.342	1.652
MXRA5	-0.829	-1.552	0.308	0.492	1.189	0.391
MYO1F	-0.312	-0.508	-1.324	0.072	0.428	1.644
MYPOP	-0.131	0.236	-1.464	-0.203	-0.092	1.653
MZT2B	-0.149	0.42	-1.549	1.445	-0.471	0.305
NACC2	-0.549	-1.514	0.49	1.454	-0.091	0.21
NANOG	-1.289	-1.056	0.761	1.211	0.42	-0.047
NANOGP1	-1.348	-1.057	0.745	1.153	0.413	0.094
NANOGP8	-1.129	-1.392	0.437	0.995	0.628	0.461
NCOR2	-0.782	-1.117	-0.613	1.467	0.706	0.339
NDUFB7	-0.034	1.216	-1.466	0.529	-0.851	0.606
NDUFS7	0.243	0.604	-1.424	1.001	-1.065	0.642
NEDD9	-0.99	-1.063	1.397	0.944	-0.199	-0.09
NEURL1B	-0.524	-1.359	-0.697	1.196	0.737	0.647
NEURL2	0.358	0.351	-2.006	0.764	0.26	0.274
NFAM1	-0.947	-0.878	0.038	1.753	-0.341	0.375
NFASC	-0.762	-0.864	-0.82	-0.004	1.197	1.252
NKX1-2	-0.131	-0.622	0.46	1.788	-0.935	-0.559
NME3	0.267	1.073	-1.421	0.578	-1.054	0.557
NODAL	-1.161	-1.047	-0.201	1.382	0.712	0.316
NOTCH3	-0.78	-1.157	-0.766	1.008	0.756	0.938
NPFFR2	-1.298	-0.683	-0.622	1.122	0.507	0.974
NPIPB5	-0.843	-0.972	1.473	0.411	0.674	-0.743
NRTN	-0.758	-0.912	-0.845	1.522	0.682	0.312
NYAP1	-0.5	-1.328	-0.686	1.253	0.905	0.357
OSBPL5	-0.522	-1.001	-0.781	0.298	1.715	0.291
OTUD7A	-0.384	-1.064	-0.445	-0.16	1.86	0.193
P2RY2	-0.489	-0.19	-1.301	0.395	-0.107	1.693
PACSIN1	-0.695	-1.023	-0.926	0.57	1.301	0.773
PANX2	-0.256	-0.454	-0.799	1.33	-0.984	1.163
PDE1B	-0.842	-1.025	-0.575	1.308	1.094	0.042
PELI3	-0.036	-0.764	-1.099	0.483	-0.285	1.701
PGPEP1	-0.753	-1.257	-0.254	1.598	0.248	0.419
PHLDA2	-0.97	-0.659	-0.899	1.492	0.682	0.354
PIANP	-0.565	-0.788	-0.603	1.742	0.672	-0.457
PIDD	-0.266	-0.631	-1.315	0.916	-0.1	1.397
PIK3IP1	-0.844	-0.907	-0.594	-0.116	1.046	1.416
PINK1	-0.565	-0.906	-0.927	-0.012	0.984	1.425
PITPNM2	-0.474	-0.906	-0.561	-0.465	1.718	0.687
PITX2	-1.234	-1.115	0.946	1.139	0.193	0.071
PKD1P5	-0.636	-0.232	-0.475	1.109	1.354	-1.119
PLA2G3	-0.011	-0.643	-1.015	-0.665	0.728	1.607
PLAC9	0.412	1.031	-1.392	0.393	-1.109	0.665
PLBD1	-0.689	-0.537	-0.856	-0.308	0.669	1.721
PLCD1	-0.008	-0.41	-1.175	-0.278	0.035	1.836
PLEKHH3	-0.36	-1.029	-0.051	1.667	-0.822	0.595
PMEPA1	-1.117	-1.222	0.925	1.158	0.253	0.004
PNMAL2	0.061	-1.128	-1.078	0.039	0.637	1.468
PNPLA3	-0.344	-1.065	-0.894	-0.067	0.925	1.445
POLD4	-0.619	-0.608	-1.277	1.309	0.291	0.905
POLN	-0.8	-0.828	-0.722	-0.11	0.99	1.47
PPDPF	-0.287	0.003	-1.691	1.241	0.014	0.72
PPP1R16B	-0.946	-1.24	-0.374	1.226	0.537	0.798
PRICKLE3	0.517	-0.056	-1.324	-0.532	-0.23	1.625
PRIMA1	-0.867	-1.126	-0.608	1.35	0.658	0.594
PRKCDBP	-0.881	-0.431	-1.31	0.774	1.016	0.832
PROB1	-0.438	-1.159	-0.584	1.699	0.488	-0.005
PROC	-0.936	-0.852	0.012	1.841	0.027	-0.092
PROK2	-1.103	-0.779	1.039	1.346	0.032	-0.534
PRR12	-0.744	-1.154	-0.672	1.357	0.817	0.396
PRR15	-1.097	-1.097	0.478	1.532	0.114	0.07
PTP4A3	-0.464	-0.714	-0.965	0.296	0.044	1.804
PTPRU	-0.523	-1.113	-1.04	1.003	0.861	0.813
PYCR2	-0.984	-1.053	-0.596	0.476	1.16	0.998
RAB11B-AS1	-0.44	-0.865	-1.035	0.045	1.567	0.728
RAB33A	0.714	1.189	-1.154	-0.603	-0.9	0.755
RAB3A	0.213	-0.51	-1.25	-0.338	0.155	1.73
RAB40C	0.305	-0.013	-1.334	0.213	-0.756	1.585
RAB43	-0.575	-0.576	-1.186	0.336	1.64	0.36
RABAC1	0.282	0.034	-1.634	0.948	-0.616	0.986
RAI1	-0.111	-0.432	0.075	1.832	-1.186	-0.179
RAPGEF3	-0.204	-0.887	-0.856	-0.521	0.989	1.48
RARA	-1.027	-1.086	0.254	1.635	0.077	0.147
RAVER1	-0.029	-0.219	-1.455	1.642	-0.231	0.291
RBFOX3	-0.574	-0.659	-0.927	0.831	-0.286	1.614
RBM20	-0.871	-0.584	0.612	1.755	-0.578	-0.334
RCN3	-0.583	-0.305	-1.471	0.512	0.456	1.391
RERE	-0.862	-1.307	-0.06	0.733	1.415	0.08
RFX1	-0.525	-0.84	-1.243	0.523	0.924	1.161
RGN	-0.212	-0.075	-0.424	-0.642	-0.635	1.988
RGS16	-1.666	-0.359	-0.301	0.914	0.998	0.415
RGS19	-0.348	-0.312	-1.275	-0.158	0.361	1.732
RHPN1	-0.395	-0.681	-0.942	-0.504	1.094	1.429
RIN1	-0.352	-0.325	-1.347	-0.092	0.463	1.653
RNF126	-0.275	-0.033	-1.413	1.389	-0.521	0.852
RNF208	-0.685	-0.406	-1.343	1.274	0.214	0.946
RNPEPL1	-0.403	-0.96	-1.179	0.48	0.739	1.323
RP11-10A14.5	-0.596	-0.971	-1.064	0.558	1.273	0.8
RP11-10A14.6	-1.068	-0.948	-0.418	0.079	1.234	1.121
RP11-161M6.2	-0.322	-0.765	-1.036	0.029	0.325	1.77
RP11-206L10.3	-0.956	-1.004	0.02	-0.233	1.662	0.512
RP11-236F9.4	-0.793	-1.025	0.591	-0.435	1.668	-0.005
RP11-274B21.1	-0.843	-1.221	1.232	0.706	0.685	-0.56
RP11-274B21.2	-0.618	-1.191	0.932	0.96	0.797	-0.88
RP11-274B21.3	-0.951	-0.757	-0.177	1.694	0.646	-0.455
RP11-274B21.4	-0.927	-0.89	-0.11	0.843	1.551	-0.467
RP11-304M2.2	-1.292	-1.045	0.513	0.225	1.367	0.232
RP11-34P13.13	-0.983	-1.053	-0.028	-0.098	1.619	0.542
RP11-390F4.6	-0.396	0.099	-1.038	-0.355	-0.204	1.894
RP11-395P17.3	-0.662	-1.36	0.338	-0.226	1.555	0.355
RP11-400F19.6	0.434	-0.165	-1.681	-0.101	0.122	1.391
RP11-422J8.1	-1.064	-1.052	-0.526	0.883	1.161	0.597
RP11-424C20.2	-0.472	-1.173	0.615	1.658	-0.51	-0.117
RP11-452L6.5	1.142	-0.101	-1.627	-0.43	0.098	0.918
RP11-469N6.1	-0.923	-1.249	-0.324	1.337	0.691	0.467
RP11-490H24.5	0.894	0.036	-1.658	-0.058	-0.361	1.148
RP11-496I9.1	-0.074	-0.954	-0.365	-0.439	-0.104	1.936
RP11-559N14.5	0.948	0.068	-1.389	-1.015	0.402	0.987
RP11-742N3.1	0.127	1.395	-1.079	0.48	-1.242	0.319
RP11-783K16.13	-0.594	-0.988	-0.991	0.309	1.008	1.256
RP11-958N24.1	-0.387	-0.64	-0.678	0.57	1.795	-0.66
RP3-412A9.11	0.047	0.641	-1.012	0.952	-1.423	0.795
RPRM	-0.73	-0.364	-0.916	1.808	-0.218	0.42
RPS11P5	0.156	1.479	-0.886	-0.158	-1.245	0.655
RPS15	0.034	0.846	-1.686	0.794	-0.629	0.643
RREB1	-0.726	-1.27	0.316	1.323	0.866	-0.509
RTN4R	-0.147	0.072	-1.367	0.87	-0.76	1.331
RUSC2	-0.426	-1.481	-0.459	0.329	0.681	1.357
S100A11	-0.456	0.025	-1.316	0.135	-0.128	1.74
S1PR5	-0.356	-1.251	-0.849	0.263	1.335	0.857
SAMD1	-0.615	-1.014	-0.975	0.481	0.778	1.344
SAPCD2	-0.194	-0.802	-0.984	-0.176	0.373	1.783
SBK1	-0.494	-1.126	-0.841	0.355	0.586	1.52
SCAND1	0.095	0.534	-1.566	0.46	-0.743	1.22
SCARA3	-0.762	-1.001	-0.878	0.455	1.247	0.94
SCARF1	-0.714	-0.845	-0.726	-0.139	0.832	1.593
SCARF2	-0.77	-0.81	-1.085	0.575	0.874	1.216
SCNN1G	-1.049	-1.144	0.756	1.393	0.219	-0.175
SERPINB9	-0.904	-0.851	1.011	1.397	0.043	-0.695
SETD1B	-0.705	-1.418	0.383	1.227	0.852	-0.339
SFN	-0.093	-0.274	-1.114	-0.49	0.123	1.849
SGK223	-0.704	-1.35	0.514	1.555	-0.035	0.019
SHD	0.092	-0.631	-1.398	1.57	-0.046	0.413
SIRPA	-0.517	-0.913	0.35	1.861	-0.457	-0.324
SLC22A3	-0.842	-1.062	0.072	-0.105	1.765	0.172
SLC22A31	-0.535	-1.122	-0.972	0.537	1.182	0.909
SLC25A10	0.413	0.077	-1.703	0.593	-0.521	1.141
SLC25A42	0.055	-0.509	-0.629	-0.539	-0.357	1.981
SLC2A6	-0.249	-0.682	-1.471	0.323	0.895	1.184
SLC43A2	-0.662	-1.119	-0.892	0.834	1.173	0.666
SLC47A1	-0.437	-0.859	-0.847	-0.387	1.232	1.299
SLC6A17	-0.353	-1.182	-0.562	0.431	1.724	-0.058
SLC9A3R2	-0.578	-0.25	-1.331	0.427	0.109	1.624
SMAD3	-0.905	-1.329	0.996	1.033	0.512	-0.307
SMAD6	-0.999	-1.282	0.099	1.408	0.57	0.204
SMAD7	-1.423	-1.063	0.948	0.232	0.795	0.512
SORCS2	-0.418	-0.662	-0.614	-0.522	0.308	1.908
SOX8	-0.547	-0.981	-0.905	0.229	0.634	1.57
SPN	-0.366	-0.792	-0.803	-0.331	0.49	1.802
SPSB1	-0.827	-1.025	-0.216	1.77	0.008	0.291
SPSB3	-0.292	-0.175	-1.397	0.356	-0.16	1.667
SPTBN4	-0.12	-0.182	-0.959	-0.294	1.947	-0.393
SREBF1	-0.264	-1.043	-0.618	1.76	-0.336	0.5
SSBP4	-0.537	-0.307	-1.608	0.691	0.909	0.852
STAG3L1	-0.056	-0.416	-0.421	-0.208	-0.863	1.964
STARD8	-1.001	-1.152	-0.424	0.53	1.265	0.781
TCF7L1	-0.668	-1.037	-0.653	1.479	-0.049	0.928
TENM4	-0.161	-0.833	-0.528	-0.112	1.969	-0.335
TFAP2C	-0.91	-1.339	0.445	0.526	1.376	-0.098
TFEB	-0.346	-0.47	0.094	1.935	-0.9	-0.313
THBS2	-0.963	-1.305	0.97	1.18	0.18	-0.062
TIGD5	0.251	-0.297	-1.566	0.752	-0.424	1.285
TIMP4	-0.876	-0.88	-0.967	0.724	0.981	1.018
TMEM132D	-0.456	-0.813	-0.573	-0.46	1.836	0.466
TMEM145	-0.172	-0.353	-0.041	0.774	1.349	-1.557
TMEM160	-0.585	0.307	-1.605	0.341	1.355	0.187
TMEM52	-0.129	-0.095	-1.503	0.122	-0.037	1.643
TMEM63A	-0.777	-0.94	-0.669	-0.07	1.379	1.076
TNK2	-0.595	-1.146	-0.821	0.295	1.107	1.16
TNRC18	-0.069	-0.526	0.149	1.904	-0.793	-0.665
TOPORS-AS1	0.055	0.618	-1.368	0.359	-0.963	1.299
TOR4A	-0.342	-1.01	-1.081	0.16	0.93	1.343
TRIM62	-0.733	-1.23	-0.469	1.417	0.186	0.829
TSPAN9	-0.315	-1.002	-1.121	0.271	0.755	1.413
TSPO	0.129	0.203	-1.381	-0.014	-0.58	1.643
TUBB6	-0.866	-0.941	-0.858	0.539	0.866	1.259
UAP1L1	-0.664	-1.114	-0.833	0.391	1.055	1.166
UBE2QL1	-0.668	-1.135	-0.178	1.793	0.071	0.116
VDR	-1.097	-0.846	0.649	1.609	-0.061	-0.255
VEGFB	-0.25	-0.651	-1.343	0.136	0.569	1.539
VSTM2L	-0.639	-0.875	-0.689	1.695	0.672	-0.163
WDR86	-0.52	-1.109	-0.483	-0.368	1.403	1.078
WNT3	-1.268	-1.289	0.682	0.872	0.517	0.488
WNT8A	-0.759	-0.742	0.558	1.789	-0.371	-0.475
ZBTB45	0.237	-0.149	-1.742	0.029	0.281	1.344
ZC3H12A	-1.178	-1.15	0.31	1.049	-0.075	1.044
ZDHHC8	-0.496	-0.974	-1.163	0.812	0.65	1.171
ZFHX3	-0.703	-0.924	0.267	1.857	-0.177	-0.32
ZFYVE28	-0.834	-0.77	-0.908	0.193	0.874	1.444
ZMIZ1	-0.494	-1.102	0.548	1.71	-0.11	-0.552
ZNF296	-0.536	0.457	-1.491	1.489	0.212	-0.131
ZNF341	-0.417	-0.871	-0.711	-0.223	1.834	0.388
ZNF362	-0.692	-1.343	-0.32	1.343	0.895	0.117
ZNF414	-0.198	0.267	-1.528	1.567	0.165	-0.273
ZNF469	-0.882	-1.139	0.617	1.51	0.307	-0.411
ZNF524	0.181	-0.327	-1.168	-0.313	-0.206	1.832
ZNF579	-0.194	-0.633	-1.248	0.337	0.039	1.699
ZNF628	0.212	-0.251	-1.64	0.843	-0.338	1.174
ZNF865	-0.103	-1.078	-0.942	0.653	-0.111	1.581
ZNHIT2	-0.173	0.319	-1.393	1.679	-0.306	-0.125
ZSWIM4	-0.61	-1.069	-0.496	1.768	0.083	0.324
