# Supplementary material for: WNT signaling memory is required for ACTIVIN to function as a morphogen in human gastruloids
Source: eLife. 2018 Oct 12;7:e38279. doi: 10.7554/eLife.38279 (PMC6234031; doi:10.7554/eLife.38279)
Supplement: Figure 4—source data 3. [file elife-38279-fig4-data3.xlsx]

## Sheet: Group 3
	read count z-score
Gene	0 h	1 h	2.5 h	4 h	8 h	12 h
A4GALT	0.41	0.109	-0.794	0.827	-1.571	1.018
ABCG1	0.103	0.59	0.465	1.223	-1.408	-0.973
AC006538.1	0.91	-0.326	-0.682	-0.126	-1.222	1.447
AC007375.1	0.539	0.527	-0.984	0.41	-1.506	1.014
AC016739.2	0.387	1.643	-1.173	0.014	-0.88	0.009
AC068134.5	1.26	0.204	0.693	-0.036	-1.626	-0.494
ADAMTS8	1.219	-0.044	-0.139	0.055	-1.749	0.657
ASH1L-AS1	-0.441	0.764	0.648	1.154	-0.736	-1.389
ATF5	0.513	0.073	-0.768	1.03	-1.591	0.742
BNIPL	0.942	0.69	-0.389	0.47	-1.804	0.092
BTBD17	1.366	0.561	-0.607	0.548	-1.384	-0.484
C15orf59	1.124	0.039	0.259	0.614	-1.798	-0.239
C17orf96	1.54	0.77	-0.072	-0.391	-1.218	-0.629
C5orf38	1.145	0.632	-0.198	0.61	-1.585	-0.603
C9orf37	0.358	0.491	-1.075	0.336	-1.351	1.24
CD247	1.034	0.956	-0.37	-0.138	-1.68	0.198
CEND1	0.391	0.902	-0.664	1.201	-1.404	-0.424
CHRNA4	0.817	0.277	0.305	1.063	-1.199	-1.263
CHST8	0.663	0.107	-0.087	1.09	-1.831	0.058
CITED1	0.629	0.3	0.105	0.403	-2.005	0.568
CITED4	0.815	0.27	-1.025	-0.025	-1.285	1.25
CNTFR	0.37	-0.319	-0.459	1.73	-0.077	-1.246
CRB2	0.59	-0.072	0.198	1.43	-1.433	-0.713
CRYBA4	0.911	0.984	-0.98	0.657	-1.322	-0.251
CTC-210G5.1	-1.069	0.134	-0.029	1.077	-1.212	1.099
DHRS2	1.157	0.385	-0.446	-0.379	-1.566	0.849
DHRS3	0.953	1.005	-0.268	0.174	-1.72	-0.146
DLK1	0.703	0.457	-0.551	0.743	-1.8	0.448
DPEP1	0.71	-0.628	-0.761	0.41	-1.153	1.423
DUSP13	0.835	0.818	-0.207	0.385	-1.855	0.024
EFNB1	0.954	0.069	0.572	0.812	-1.521	-0.886
EGR1	1.103	1.267	-0.59	0.123	-0.978	-0.926
EMX1	1.001	0.89	0.468	-0.7	-1.578	-0.08
FAM109B	0.414	0.702	-1.056	-0.355	-1.088	1.383
FAM46B	1.382	0.543	-0.648	-0.725	-1.197	0.644
FAM57B	0.629	-0.053	-0.965	0.631	-1.395	1.152
FOS	-0.342	2.02	-0.162	-0.582	-0.429	-0.505
FOSB	-0.512	2.002	-0.585	-0.575	-0.126	-0.203
FOXJ1	1.458	0.703	-0.089	-0.562	-1.432	-0.078
FOXP4	0.252	0.206	0.422	1.401	-1.415	-0.866
FUT2	1.705	0.401	-0.85	-0.406	-1.01	0.16
FXYD7	1.166	0.629	-0.642	0.209	-1.646	0.284
FZD2	1.137	0.9	-0.145	-0.075	-1.689	-0.129
GADD45B	-1.539	1.441	0.577	0.066	-0.456	-0.09
GALNT9	0.792	0.278	-0.009	1.216	-1.473	-0.804
GAPDHP1	0.5	0.314	-1.066	0.04	-1.216	1.427
GNAS-AS1	0.831	0.818	-0.684	0.359	-1.703	0.379
GPRC5C	0.753	0.668	0.045	0.424	-1.95	0.06
GPX2	0.615	0.495	-0.721	0.17	-1.635	1.075
GS1-124K5.4	0.027	1.72	-1.347	0.204	-0.307	-0.297
GUCA1A	0.789	0.405	-0.896	-0.267	-1.308	1.277
HES3	1.044	1.128	0.118	-0.255	-1.512	-0.522
HMOX1	1.074	0.472	-0.648	0.645	-1.665	0.122
HRH3	0.718	0.232	0.483	0.957	-1.656	-0.735
HTR1D	1.698	0.637	-0.481	-0.423	-1.089	-0.342
IL6	0.843	1.226	-0.175	-0.616	-1.522	0.243
KCNQ4	1.403	0.57	0.327	-0.074	-1.353	-0.873
KIAA1614	1.74	-0.272	-0.475	0.308	-1.255	-0.046
KLF15	1.202	0.589	-0.317	-0.58	-1.536	0.642
LGI4	1.37	-0.101	-0.05	0.614	-1.642	-0.191
LIPE	1.523	0.281	-1.305	0.005	-0.874	0.37
LRRC4B	0.968	0.657	-0.325	0.945	-1.362	-0.882
LYRM9	-0.783	1.221	0.375	0.947	-0.485	-1.274
MIR24-2	-1.368	1.171	0.912	0.451	-0.444	-0.723
MIR25	0.101	0.697	-0.076	0.082	-1.846	1.042
MMP17	0.816	0.502	-0.918	1.323	-0.907	-0.817
MUC1	0.428	0.121	0.26	1.462	-1.227	-1.044
NGB	0.204	0.961	-0.3	0.184	-1.821	0.772
NMU	0.602	1.186	0.377	-0.051	-1.71	-0.403
NXPH3	0.948	-0.224	-0.256	1.054	-1.687	0.164
OPTC	0.72	0.582	0.174	0.385	-1.987	0.126
OR7E14P	0.594	0.43	-0.652	0.875	-1.74	0.493
P2RX1	0.471	1.061	-0.004	0.753	-1.633	-0.647
PDDC1	-0.166	-0.089	-0.471	1.362	-1.477	0.84
PHLDB3	1.375	0.655	-0.718	-1.146	-0.73	0.564
PHYHIP	1.672	0.293	-0.649	-0.719	-1.006	0.409
PKDCC	1.368	0.559	0.071	0.29	-1.38	-0.907
PKNOX2	0.371	0.638	0.126	1.13	-1.679	-0.586
PNMT	1.129	0.878	-0.851	0.257	-1.47	0.057
PPP1R1B	1.36	0.833	-0.286	0.209	-1.275	-0.841
PRR19	0.813	0.494	-0.781	0.669	-1.675	0.481
PRR5	0.458	0.031	-0.264	0.661	-1.838	0.952
REM2	1.176	0.092	-0.822	-0.525	-1.113	1.191
RHBDL3	1.311	-0.15	-0.051	0.567	-1.713	0.036
RP1-302G2.5	0.682	1.202	-0.296	-0.385	-1.634	0.431
RP11-126K1.2	0.762	0.485	-0.541	0.686	-1.803	0.411
RP11-326K13.4	-1.092	0.261	0.344	1.583	-1.055	-0.04
RP11-357K6.1	0.45	1.397	-0.74	0.423	-1.453	-0.077
RP11-426L16.8	0.941	1.072	-0.366	0.403	-1.559	-0.491
RP11-556K13.1	0.436	0.565	-1.278	-0.258	-0.883	1.418
RP11-69L16.5	0.175	0.616	-0.61	0.046	-1.561	1.333
RP11-761N21.2	-0.569	1.535	-1.19	0.033	0.761	-0.57
RP11-8P11.3	1.134	0.872	-0.314	-0.295	-1.645	0.248
RP13-1032I1.7	0.168	0.266	-0.137	1.356	-1.742	0.089
RPS3AP5	-0.295	1.877	-0.406	0.32	-0.78	-0.716
RTN4RL2	0.352	-0.016	-0.303	1.546	-1.547	-0.032
SCUBE1	1.181	-0.165	-0.094	1.003	-0.368	-1.558
SHANK1	0.841	0.31	0.299	0.948	-1.607	-0.791
SLC30A2	0.614	0.125	-0.564	0.869	-1.745	0.7
SLC6A12	0.634	-0.5	0.532	0.706	-1.832	0.459
SNAI3	0.457	0.299	-0.958	-0.662	-0.787	1.651
SNCB	0.665	0.497	-0.753	0.23	-1.64	1.001
SNCG	0.536	0.86	-0.739	0.193	-1.656	0.805
SNHG9	-0.731	1.081	-1.621	0.654	0.472	0.144
SNORA76	0.029	1.709	-0.429	0.337	-1.285	-0.362
SOCS1	1.059	0.309	-0.448	-0.561	-1.445	1.086
SOD3	1.106	0.781	0.133	-0.234	-1.759	-0.027
SPHK2	1.047	0.231	-0.984	-0.208	-1.233	1.147
SPIB	1.193	0.277	-0.77	0.056	-1.522	0.766
SSTR3	1.264	0.771	0.236	-0.325	-1.586	-0.36
SYNDIG1L	0.899	0.504	0.28	0.755	-0.82	-1.618
TDRG1	0.019	0.654	-0.25	1.52	-0.579	-1.364
TESC	1.148	1.022	-0.392	0.377	-1.183	-0.971
TNN	0.94	0.424	-0.07	0.975	-0.683	-1.586
TRIM54	0.406	-0.219	-0.41	1.34	-1.607	0.489
UFSP1	0.689	0.465	-0.943	-0.142	-1.338	1.268
USH1G	1.299	0.818	-1.082	0	-1.202	0.167
VASN	1.025	0.6	-0.192	0.117	-1.856	0.306
VGF	0.08	0.158	-0.985	1.836	-0.674	-0.416
VWA1	0.242	-0.171	-0.358	1.659	-1.424	0.052
ZNF385C	0.357	-0.152	-0.666	1.812	-1.001	-0.351
