# Supplementary material for: WNT signaling memory is required for ACTIVIN to function as a morphogen in human gastruloids
Source: eLife. 2018 Oct 12;7:e38279. doi: 10.7554/eLife.38279 (PMC6234031; doi:10.7554/eLife.38279)
Supplement: Figure 4—source data 4. [file elife-38279-fig4-data4.xlsx]

## Sheet: group 1
Rank order	Motif	Sequence	p-value
1	LMX1B_HUMAN.H10MO.D	TAATTAAHWVMYTWWWWW	1.405e-107
2	DMBX1_HUMAN.H10MO.D	YMMTWWWAAYCYAATTAABD	1.009e-105
3	SHOX_HUMAN.H10MO.D	YTAATTRRYTWWWWWWD	1.57e-94
4	NKX61_HUMAN.H10MO.D	WWTTAATKASBTTTWAWTD	3.541e-94
5	DLX4_HUMAN.H10MO.D	TAATTASNBHWWWWWD	1.367e-93
6	GBX1_HUMAN.H10MO.D	BTAATTRRYNHWWWWWW	3.861e-92
7	NKX31_HUMAN.H10MO.C	WWTAAGTATWTWW	1.3e-90
8	GSX2_HUMAN.H10MO.D	YTAATTRSHWWTTAAT	1.667e-90
9	PHX2B_HUMAN.H10MO.D	TAATYTAATTA	1.982e-89
10	ALX3_HUMAN.H10MO.D	TAATYTAATTA	4.171e-89
11	LHX9_HUMAN.H10MO.D	YTAATTAGYNHWWWWWWD	3.944e-88
12	SHOX2_HUMAN.H10MO.D	YTAATTRRYYHWWWWWD	4.219e-88
13	ALX1_HUMAN.H10MO.B	RTAATTRVATTA	9.703e-88
14	UNC4_HUMAN.H10MO.D	TAATTTAATTA	1.597e-87
15	ESX1_HUMAN.H10MO.D	RYTAATTRGYNHWWWTW	1.034e-86
16	DRGX_HUMAN.H10MO.D	TAATYTAATTA	5.451e-86
17	ARX_HUMAN.H10MO.D	YTAATYTAATTAR	1.062e-85
18	DLX6_HUMAN.H10MO.D	TAATTANNNHWWWWW	2.771e-84
19	FOXD2_HUMAN.H10MO.D	WAWGTAAATRTTWWYTTAA	3.591e-84
20	EVX1_HUMAN.H10MO.D	TDHTWDTWTGTTTACTTAWM	7.07e-83
21	HXA11_HUMAN.H10MO.D	TWAADTTTTAYGR	1.868e-82
22	GBX2_HUMAN.H10MO.D	BTAATTRSYBHHWWWWW	2.214e-82
23	DLX5_HUMAN.H10MO.D	AATTWDNBDTAATT	8.672e-82
24	PHX2A_HUMAN.H10MO.D	TAATYTAATTA	1.27e-81
25	PO3F2_HUMAN.H10MO.D	AWWATTYATG	2.451e-81
26	BARX1_HUMAN.H10MO.D	TAATYGNTWTTTAATKG	2.617e-81
27	MSX1_HUMAN.H10MO.D	TAATTGSWWKTTAATTGS	6.714e-80
28	PO4F1_HUMAN.H10MO.D	CATTAATTATTCAT	1.258e-79
29	ALX4_HUMAN.H10MO.D	TAATYTAATTAR	1.264e-77
30	ARI3A_HUMAN.H10MO.D	RATTAAWBRRWATCAAAWTWWA	2.37e-77
31	GSX1_HUMAN.H10MO.D	TAATTAGNDDTTAAT	3.396e-76
32	PO2F2_HUMAN.H10MO.D	WMATTTGCATAWTYAW	6.665e-76
33	PO4F3_HUMAN.H10MO.D	TCATTAATTATKCAT	9.851e-76
34	PROP1_HUMAN.H10MO.D	RASHAATTAAHATVR	1.492e-75
35	PO3F4_HUMAN.H10MO.D	TMATTTGCATAATTWAW	5.351e-75
36	LMX1A_HUMAN.H10MO.D	TAATTAATTWKKTWATTWW	9.944e-75
37	ISX_HUMAN.H10MO.D	YTAATTRGHTWWWWWW	2.124e-73
38	LHX3_HUMAN.H10MO.C	AAAATTAATTARY	5.339e-73
39	RAX2_HUMAN.H10MO.D	YTAATTARATWA	2.824e-72
40	PO3F3_HUMAN.H10MO.D	WWWAWTTATGCWWATTW	1.087e-71
41	HMX1_HUMAN.H10MO.D	DTTAATTGHTTTTTAAT	1.081e-70
42	HNF1B_HUMAN.H10MO.B	RGTTAATRWTTAAC	6.677e-69
43	LHX6_HUMAN.H10MO.D	VYTAATTAGYRYTAATTA	4.209e-68
44	PIT1_HUMAN.H10MO.C	YTMATGAATATWY	1.24e-67
45	VSX1_HUMAN.H10MO.D	TAATTAGCHWWWWW	5.641e-67
46	ZFHX3_HUMAN.H10MO.D	ATTAWTAATTA	4.612e-66
47	HXB3_HUMAN.H10MO.D	YTAATTASYTTTTW	5.691e-66
48	P5F1B_HUMAN.H10MO.D	DMATTTGCATATTYAW	1.504e-65
49	HXC10_HUMAN.H10MO.D	WWWWWWWNNWTTTWATKRC	6.526e-65
50	HXD9_HUMAN.H10MO.D	ARWTTNATKD	2.306e-63
51	HXD11_HUMAN.H10MO.D	DWTTTATKRHN	5.706e-63
52	HXC12_HUMAN.H10MO.D	DTTTTAYKACYT	6.031e-63
53	FOXB1_HUMAN.H10MO.D	RTMAATRTTTACATAAB	3.21e-62
54	CDC5L_HUMAN.H10MO.D	GBGWKTTAAYRTAWY	1.547e-61
55	HME1_HUMAN.H10MO.D	VCTAATTRSYHAWWWWW	2.762e-61
56	DLX1_HUMAN.H10MO.D	WWWWWTATGSTAATTA	7.79e-60
57	HXA10_HUMAN.H10MO.C	KATRRTTTATGW	4.387e-59
58	BARH1_HUMAN.H10MO.D	TAAWYGBYBHTAA	4.543e-59
59	CDX2_HUMAN.H10MO.C	WTTTATRD	5.077e-59
60	MEOX1_HUMAN.H10MO.D	GGTAATTAGBGKHAWW	5.092e-59
61	ARI3A_HUMAN.H10MO.S	AATTAAA	1.416e-57
62	MEOX2_HUMAN.H10MO.D	TTAATKAYBWT	2.191e-57
63	VAX1_HUMAN.H10MO.D	RSTAATTAGBSTWAWTWW	2.681e-57
64	BARH2_HUMAN.H10MO.D	VYTAAWYGNTSHWWWWHR	4.067e-57
65	HXC13_HUMAN.H10MO.D	DDTTTTACKAG	5.03e-57
66	FOXQ1_HUMAN.H10MO.C	HATTGTTTATTT	1.031e-56
67	LHX8_HUMAN.H10MO.D	YRYTRATTRCMATTAATT	1.275e-56
68	PAX7_HUMAN.H10MO.D	TAATYGATTAW	4.621e-56
69	DLX2_HUMAN.H10MO.D	ATAATTRB	7.544e-56
70	HXD4_HUMAN.H10MO.D	TTAATTGW	8.579e-56
71	PAX4_HUMAN.H10MO.D	TWAYTAATTMRH	1.315e-53
72	TBP_HUMAN.H10MO.C	RRTATAWAWDS	2.033e-53
73	HMGA2_HUMAN.H10MO.D	AATWWYSSSSAATAT	2.558e-53
74	PO3F1_HUMAN.H10MO.C	VATKSWWATGCAAW	2.664e-53
75	HMX2_HUMAN.H10MO.D	DTTAAKTGNTT	3.117e-53
76	CDX1_HUMAN.H10MO.C	HTTTATGD	6.256e-53
77	HXB7_HUMAN.H10MO.C	TTGATTRATK	1.56e-52
78	NKX62_HUMAN.H10MO.D	NDTTAATKASN	5.437e-52
79	EVX2_HUMAN.H10MO.A	TTTTATKRCHYH	4.554e-51
80	PRRX2_HUMAN.H10MO.C	YTAATTR	1.277e-50
81	ONEC3_HUMAN.H10MO.D	TATYGATTTTTT	9.08e-50
82	HXB8_HUMAN.H10MO.C	TTGATTAATKV	9.349e-50
83	GATA5_HUMAN.H10MO.D	WVANWGATAAYTYRRHK	1.501e-49
84	EMX2_HUMAN.H10MO.D	TAATTAGYDWAW	7.961e-49
85	SOX3_HUMAN.H10MO.D	WSAATGBWATTSW	3.121e-48
86	HXA2_HUMAN.H10MO.D	NGTAATTARBD	7.528e-48
87	RX_HUMAN.H10MO.D	TTAATTRRYWA	7.711e-48
88	FOXF1_HUMAN.H10MO.D	WTGTTTATTTW	9.38e-48
89	EMX1_HUMAN.H10MO.D	TAATTAGYTAAW	1.048e-47
90	HXC6_HUMAN.H10MO.D	ATGATTTATTACTTT	1.488e-47
91	LHX2_HUMAN.H10MO.D	YRSDTTYAATWAG	3.675e-47
92	BARX2_HUMAN.H10MO.D	TYRWTAATKR	1.722e-46
93	PO2F1_HUMAN.H10MO.B	HATGCAAAT	2.626e-46
94	FOXF2_HUMAN.H10MO.D	TGTTTACHTWD	2.772e-46
95	NFAC1_HUMAN.H10MO.A	MMATGGAAAWTT	3.337e-46
96	IRF9_HUMAN.H10MO.C	GAAAGCGAAAYT	4.09e-46
97	DUXA_HUMAN.H10MO.D	TGATTARRTYA	5.255e-46
98	HXB13_HUMAN.H10MO.D	DDTTTTAYKRG	5.925e-46
99	FOXP3_HUMAN.H10MO.D	AATKTGWTT	6.279e-46
100	FOXJ2_HUMAN.H10MO.C	TGTTTRTTTW	6.672e-46
101	HNF1A_HUMAN.H10MO.A	RGTTAATMWTTAMCM	1.584e-45
102	ZN232_HUMAN.H10MO.D	TGTTAAAYGTAGATTAAGY	7.405e-45
103	FOXJ3_HUMAN.H10MO.A	TTGTTTATKKTTW	7.788e-45
104	MIXL1_HUMAN.H10MO.D	GBTAATTARAT	7.812e-45
105	ONEC2_HUMAN.H10MO.D	DKSWTKWTATKGATTTTTYYT	1.24e-44
106	LHX4_HUMAN.H10MO.D	DNRYTAATTRN	2.301e-44
107	CPEB1_HUMAN.H10MO.D	TTTTTATTYTTTTTTTT	3.111e-44
108	HXD10_HUMAN.H10MO.D	TGCTTTAATT	3.569e-44
109	TEF_HUMAN.H10MO.D	TGTTTATGTAAMTK	1.205e-43
110	HXC11_HUMAN.H10MO.D	DTTTWAYGACY	2.159e-43
111	PO5F1_HUMAN.H10MO.A	CYWTTSWTATGCAAAT	2.207e-43
112	FOXD3_HUMAN.H10MO.D	TGTTTGTTT	2.9e-43
113	IRX3_HUMAN.H10MO.D	WNWCATGTWMT	5.296e-43
114	SOX5_HUMAN.H10MO.C	YATTGTTW	5.94e-43
115	FOXL1_HUMAN.H10MO.D	TKTTTGTTTRTTTAYWTTT	7.375e-43
116	IRF7_HUMAN.H10MO.C	GAAASYGAAA	8.658e-43
117	MNX1_HUMAN.H10MO.D	MBATTTDHWTHWCYHYTHH	1.004e-42
118	NFAC2_HUMAN.H10MO.B	TGGAAAAWY	1.343e-42
119	HXD12_HUMAN.H10MO.D	DDTTTTAHKRN	3.239e-42
120	SOX7_HUMAN.H10MO.D	AACAMTGMAATTGTTY	6.124e-42
121	FOXG1_HUMAN.H10MO.D	DTTGTTTAYDTWTDTTT	6.556e-42
122	PO4F2_HUMAN.H10MO.D	YATTAATGAGYTK	1.546e-41
123	FOXJ3_HUMAN.H10MO.S	TKKTTWWTGTTTA	2.141e-41
124	SOX21_HUMAN.H10MO.D	RAACAATGKYAKTGTT	1.139e-40
125	PAX3_HUMAN.H10MO.D	GWTAATYGATTAW	2.247e-40
126	BSH_HUMAN.H10MO.D	YVATTAACBMATTA	2.364e-40
127	FOXA1_HUMAN.H10MO.A	WTRTTTACWYWDB	1.921e-39
128	HXD8_HUMAN.H10MO.D	WAATWTGCAYN	2.965e-39
129	EVI1_HUMAN.H10MO.B	WAGAYAAGATAANAKA	6.162e-39
130	FOXD1_HUMAN.H10MO.D	CWWTGTTTACHTWVR	1.755e-38
131	VAX2_HUMAN.H10MO.D	CACTAATTAVSYTWWH	7.832e-38
132	FOXA3_HUMAN.H10MO.C	HTRTTTRYTTWBY	2.947e-37
133	FOXO3_HUMAN.H10MO.B	KRYTTGTTTWCMK	3.228e-37
134	CUX2_HUMAN.H10MO.D	DATCRATWHDDTTATCGATYA	4.167e-37
135	MEF2C_HUMAN.H10MO.C	DKCTATTTTTRGM	4.5e-37
136	PO2F3_HUMAN.H10MO.D	DTYATGCWWAWTTR	1.378e-36
137	ZN333_HUMAN.H10MO.D	SKATAATGA	2.707e-36
138	NFIL3_HUMAN.H10MO.C	RTTAYGTAAYKYMB	5.15e-35
139	NOTO_HUMAN.H10MO.D	RTTAATTAGNT	1.712e-34
140	HXB6_HUMAN.H10MO.D	AWTGATTKATGMM	1.748e-34
141	FOXO1_HUMAN.H10MO.C	DDBTTGTTTWBWWTTT	2.878e-34
142	NANOG_HUMAN.H10MO.A	YYWTTGWNATGCAAATK	2.997e-34
143	GATA3_HUMAN.H10MO.C	WVAGATAAVAW	1.796e-33
144	NFAC4_HUMAN.H10MO.C	DGGAAAAYTW	2.058e-33
145	HMX3_HUMAN.H10MO.D	NNTTAATTGST	2.393e-33
146	SOX1_HUMAN.H10MO.D	DATSAATGTTATTSAT	5.385e-33
147	DLX3_HUMAN.H10MO.C	GMTAATTRSW	4.439e-32
148	NOBOX_HUMAN.H10MO.C	HTAATTRSY	2.743e-31
149	GATA6_HUMAN.H10MO.S	NWGATAA	3.544e-31
150	HXA5_HUMAN.H10MO.D	YTRATTAATG	3.992e-31
151	SOX8_HUMAN.H10MO.D	WSACTGMAATTGATKY	4.943e-31
152	PDX1_HUMAN.H10MO.C	RGTAATTAG	5.16e-31
153	SOX13_HUMAN.H10MO.D	YATTGTTY	6.848e-31
154	HNF6_HUMAN.H10MO.C	WWTATTGATTTWDH	1.135e-30
155	ZN384_HUMAN.H10MO.C	GSAAAAAVYMKS	1.877e-30
156	PBX2_HUMAN.H10MO.C	KRAWKTGATTGATKS	2.418e-30
157	SRY_HUMAN.H10MO.B	YWTTGTTTH	2.808e-30
158	TEAD3_HUMAN.H10MO.D	GAHATTYYWGCYBYW	3.462e-30
159	SOX2_HUMAN.H10MO.B	CCWTTGTYATGCAAAW	4.117e-30
160	HOMEZ_HUMAN.H10MO.D	WWWAATCGTTTTYTW	1.658e-29
161	FOXC1_HUMAN.H10MO.C	CDWTGTTTACTTWRG	5.038e-29
162	ETV2_HUMAN.H10MO.D	YNYKRTTTYND	5.094e-29
163	HMGA1_HUMAN.H10MO.D	NWATTTT	1.119e-28
164	HXA9_HUMAN.H10MO.D	TGACAGTTTWAYGR	2.116e-28
165	FOXO6_HUMAN.H10MO.D	WWSWTGTTTACRT	5.175e-28
166	FOXO4_HUMAN.H10MO.C	TTGTTTAYK	1.275e-27
167	DBP_HUMAN.H10MO.B	VTTATGYAABM	7.217e-27
168	BATF3_HUMAN.H10MO.D	HHTYRYTTACGK	8.268e-27
169	HXA13_HUMAN.H10MO.C	GDTTTTATTGG	2.815e-26
170	FOXP2_HUMAN.H10MO.A	BTGTTTACN	9.902e-26
171	MSX2_HUMAN.H10MO.D	TAATTDK	1.581e-25
172	HXC8_HUMAN.H10MO.D	YTTSATTRATDSSC	1.683e-25
173	SOX11_HUMAN.H10MO.D	AACAMTGMMATTGTTB	2.995e-25
174	IRF2_HUMAN.H10MO.C	SGAAAGYGAAASYR	3.157e-25
175	FUBP1_HUMAN.H10MO.D	TYGTNTTTTTTT	5.029e-25
176	NKX22_HUMAN.H10MO.D	KTYAAGTRSTTD	5.777e-25
177	FOXA2_HUMAN.H10MO.A	TGTTTACWYWG	1.722e-24
178	OLIG2_HUMAN.H10MO.D	RCCATATGKTT	2.351e-24
179	STAT6_HUMAN.H10MO.C	TTCYYHGGAAWYY	6.456e-24
180	HXD3_HUMAN.H10MO.D	NGKTAATTAGK	1.762e-23
181	AIRE_HUMAN.H10MO.C	HTTGGWWWWAWTGGDTWH	5.91e-23
182	VENTX_HUMAN.H10MO.D	YVYTAATYGSTTHHHWWTT	6.118e-23
183	PO6F1_HUMAN.H10MO.D	CATAAWTTATGCR	1.673e-22
184	MEF2B_HUMAN.H10MO.D	TGTTRCTATWWATAGC	1.767e-22
185	BCL6_HUMAN.H10MO.C	DARDRCTTTCYWGGAA	1.788e-22
186	ZBT49_HUMAN.H10MO.D	NBSNTAATTRV	2.358e-22
187	LBX2_HUMAN.H10MO.D	RYTAATTRGBY	4.43e-22
188	OLIG1_HUMAN.H10MO.D	AMCATATGTTTTTY	1.806e-21
189	NANOG_HUMAN.H10MO.S	KTTAATGG	6.408e-20
190	CEBPE_HUMAN.H10MO.A	TTKCGHAATMTB	7.091e-20
191	TF7L2_HUMAN.H10MO.A	KBYCTTTGAWSTB	3.808e-19
192	FOXM1_HUMAN.H10MO.D	BTTGWKTGWTTWY	4.395e-19
193	HSFY1_HUMAN.H10MO.D	WWTCGAACGWWW	6.13e-19
194	OLIG3_HUMAN.H10MO.D	ACCATATGKTB	9.323e-19
195	SOX18_HUMAN.H10MO.D	SHWHVMWTTGTTBTYKTCC	1.144e-18
196	MEF2D_HUMAN.H10MO.C	GCTATTTWTAGV	1.309e-18
197	PBX1_HUMAN.H10MO.B	WAWTTGATTGATGDB	1.93e-18
198	LEF1_HUMAN.H10MO.C	CTTTGWW	3.906e-18
199	SOX17_HUMAN.H10MO.D	CAAMAATNHHCATTGTCS	9.603e-18
200	IRF5_HUMAN.H10MO.D	KAAAGGRAARCMAAAWSWGA	1.496e-17
201	GATA6_HUMAN.H10MO.B	DDVAGATAAGAWAR	1.605e-17
202	HMBX1_HUMAN.H10MO.D	DVCTRGTTAMN	1.906e-17
203	NFAC3_HUMAN.H10MO.B	TGGAAAAHY	3.487e-17
204	NFAC1_HUMAN.H10MO.S	HGGAAAWTTCCAT	8.303e-17
205	STAT2_HUMAN.H10MO.B	TYASTTTCNBTTYCH	1.27e-15
206	HLF_HUMAN.H10MO.C	GRTTRYGTAAYMS	2.031e-15
207	SOX9_HUMAN.H10MO.B	YCCATTGTTYT	2.191e-15
208	MEF2A_HUMAN.H10MO.A	DKCTATTTTTRGM	5.267e-15
209	OVOL1_HUMAN.H10MO.C	KGTAACKGT	6.611e-15
210	BPTF_HUMAN.H10MO.D	KKTBTTGTKKKS	7.175e-15
211	IRF3_HUMAN.H10MO.C	GGAAAGBGAAASBRRRA	1.068e-14
212	CEBPG_HUMAN.H10MO.C	ATTDTGCAATCTB	1.566e-14
213	ETV3_HUMAN.H10MO.D	KWMRTTTGCACTTC	2.515e-14
214	HME2_HUMAN.H10MO.D	NNTRRTTARNB	9.952e-14
215	STA5B_HUMAN.H10MO.C	YTTCTKRGAAR	1.093e-13
216	NR2E3_HUMAN.H10MO.C	AAAGTCAAAAGTCA	2.119e-13
217	STA5A_HUMAN.H10MO.B	YTTCYKRGAAW	7.57e-13
218	ISL2_HUMAN.H10MO.D	YVYTAAKTGCW	8.527e-13
219	BHE22_HUMAN.H10MO.D	AVCATATGTTTTT	1.03e-12
220	MYBA_HUMAN.H10MO.D	HRACCGTTAAM	1.659e-12
221	HBP1_HUMAN.H10MO.D	AYYCATTGA	1.821e-12
222	VSX2_HUMAN.H10MO.D	TAATTAGCTHW	3.445e-12
223	GATA4_HUMAN.H10MO.B	RSWGATAAV	5.503e-12
224	ISL1_HUMAN.H10MO.D	SYTAATR	6.968e-12
225	SOX15_HUMAN.H10MO.D	CWTTGTT	1.131e-11
226	BRAC_HUMAN.H10MO.D	RSAWWGTGACACCTAGGTGTGAAAT	7.449e-11
227	NR2E1_HUMAN.H10MO.D	DMTTGACTTWTTGACTT	8.374e-11
228	ZN713_HUMAN.H10MO.D	RWAGAARAADGVSANGMAA	1.089e-10
229	ZN652_HUMAN.H10MO.D	AARGGGTTAAW	1.269e-10
230	PITX3_HUMAN.H10MO.D	RGGGDWTWAAGGGATTAR	2.442e-10
231	ELF5_HUMAN.H10MO.D	AHMAGGAWRTW	2.509e-10
232	TBX19_HUMAN.H10MO.D	WWTTCRCACVTAGGTGTGAAWW	5.667e-10
233	MAFF_HUMAN.H10MO.A	AWWWHTGCTGASTCAGCAWWWW	2.426e-09
234	PO6F2_HUMAN.H10MO.D	KWTAATKAGST	3.082e-09
235	STAT4_HUMAN.H10MO.D	YTTCYYRGAAR	4.265e-09
236	HXA7_HUMAN.H10MO.D	VMTCRATMGATTGGM	6.108e-09
237	BATF_HUMAN.H10MO.A	ABTYYYRDWATGASTCAK	1.82e-08
238	CEBPD_HUMAN.H10MO.B	RRTKDBGCAAT	2.079e-08
239	NR1D1_HUMAN.H10MO.C	AWAARTAGGTCARW	3.242e-08
240	TF2LX_HUMAN.H10MO.D	GACAGCTGTCATWRY	4.62e-08
241	GFI1B_HUMAN.H10MO.C	WGCAGTGATTT	6.211e-08
242	GATA1_HUMAN.H10MO.S	DSAGATAAGR	1.059e-07
243	HXB2_HUMAN.H10MO.D	WAGAAYVTTCTAGAA	1.318e-07
244	E2F7_HUMAN.H10MO.D	WWDGGCGCGAAAM	3.558e-07
245	HXD13_HUMAN.H10MO.D	TTTATTAGRGA	1.316e-06
246	GRHL1_HUMAN.H10MO.D	AACCGGTTTDDC	2.078e-06
247	STAT1_HUMAN.H10MO.S	SDYTTCCRGGAAAYS	2.126e-06
248	SOX10_HUMAN.H10MO.D	BCWTTGT	3.323e-06
249	IRF1_HUMAN.H10MO.A	RAAASNGAAAGTGAAASTRR	3.696e-06
250	FOXH1_HUMAN.H10MO.A	TGTGGATTSNR	6.181e-06
251	FEV_HUMAN.H10MO.C	CAGGAARTDA	1e-05
252	FOXC2_HUMAN.H10MO.D	GTTTGTTTWSHYAGR	1.43e-05
253	MEIS1_HUMAN.H10MO.C	TGACAGBTTWAHG	2.48e-05
254	CRX_HUMAN.H10MO.C	VRGATTAR	2.71e-05
255	TCF7_HUMAN.H10MO.C	ASWWCAAAGSRB	4.361e-05
256	E2F3_HUMAN.H10MO.B	SSCGCSAAAC	6.106e-05
257	ZBED1_HUMAN.H10MO.D	YATGTCGCGAYAK	8.831e-05
258	SPIB_HUMAN.H10MO.B	ARAAASMGGAAS	0.0001883
259	PRRX1_HUMAN.H10MO.D	TAAYCTG	0.0001897
260	CEBPA_HUMAN.H10MO.A	DRTTGTGCAAYHW	0.0002435
261	STAT1_HUMAN.H10MO.A	YCMTTTCCHGGAAAWCHCATKM	0.0002794
262	ZN410_HUMAN.H10MO.D	TATTATGGGATGK	0.000306
263	PRDM1_HUMAN.H10MO.C	RAAAGTGAAAGTGA	0.0003432
264	HSF4_HUMAN.H10MO.D	TRGAABVTTCTAGAA	0.0007169
265	CREB5_HUMAN.H10MO.D	RRTGACGTMAT	0.0007416
266	PAX2_HUMAN.H10MO.D	RHTCAGTSAYGMGTGAYW	0.001087
267	GMEB2_HUMAN.H10MO.D	NBKTACGTVRN	0.001858
268	ARI5B_HUMAN.H10MO.C	DBYKDGTATTSKR	0.001981
269	HSF2_HUMAN.H10MO.A	VGAABRTTCTAGAA	0.002081
270	FOXI1_HUMAN.H10MO.B	YTBTGATTGGYY	0.004642
271	NGN2_HUMAN.H10MO.D	AMCATATGYYWHH	0.005232
272	NRF1_HUMAN.H10MO.A	SYGCGCMTGCGCRSBGSS	0.005559
273	ERF_HUMAN.H10MO.D	WASAKKWSKTWSGRBAYTTC	0.01099
274	GFI1_HUMAN.H10MO.C	GCWSTGATTT	0.01253
275	BCL6B_HUMAN.H10MO.D	HYGCTTTCKAG	0.0157
276	MAFG_HUMAN.H10MO.S	MATGACT	0.02182
277	MBD2_HUMAN.H10MO.B	SSGKCCGGMGR	0.02356
278	TFEB_HUMAN.H10MO.C	RGTCACGTG	0.03135
279	PBX3_HUMAN.H10MO.B	YBYTGATTGRYTGR	0.04253
280	IRF8_HUMAN.H10MO.D	GRGRAAVTGAAASYR	0.04457
281	GSC_HUMAN.H10MO.D	ADSGGATTARB	0.06116
282	MGAP_HUMAN.H10MO.D	AGGTGTGAAWTTTCAC	0.07244
283	ATF1_HUMAN.H10MO.B	NRTGACGTMAK	0.08119
284	GATA2_HUMAN.H10MO.A	RSAGATAAGVV	0.08475
285	E4F1_HUMAN.H10MO.D	YGTKACGTC	0.0877
286	HSF1_HUMAN.H10MO.A	RGAANVTTCYAGAA	0.1038
287	E2F5_HUMAN.H10MO.B	SGCGCSAAAH	0.1054
288	MAFK_HUMAN.H10MO.A	RAAWNTGCTGASTCAGCAWWWW	0.1054
289	TEAD1_HUMAN.H10MO.D	YACATTCCWSMKSH	0.1487
290	NR1I2_HUMAN.H10MO.S	RAGTTCAB	0.2741
291	CEBPB_HUMAN.H10MO.A	KATTGCRYAAYH	0.2833
292	NKX23_HUMAN.H10MO.D	BTYAAGTGGKW	0.3558
293	TAL1_HUMAN.H10MO.A	CTGKNNNNNDSWGATAAGV	0.472
294	ERG_HUMAN.H10MO.B	RRACCGGAARTSV	0.5043
295	NF2L1_HUMAN.H10MO.C	NATGACD	0.5856
296	ATOH1_HUMAN.H10MO.D	YRMCATATGYY	0.634
297	ETV6_HUMAN.H10MO.D	WVCCGGAAGTR	0.6656
298	NKX32_HUMAN.H10MO.C	AGYTAAGTGGV	0.6684
299	DPRX_HUMAN.H10MO.D	VSGGATTADCB	0.7102
300	CUX1_HUMAN.H10MO.C	RBRSBDATCGATSK	0.7433
301	ZSC16_HUMAN.H10MO.D	RRGGTGYTCTGTTAACAMTW	0.776
302	SOX4_HUMAN.H10MO.C	CSCTTTGTTCTC	0.9294
303	PAX6_HUMAN.H10MO.D	TSAWGCGTRAA	0.9424
304	ARNT_HUMAN.H10MO.B	BYRCGTGC	0.9629
305	E2F4_HUMAN.H10MO.A	NDDKGGCGSGAAAN	0.9711
306	CREB1_HUMAN.H10MO.A	TKACGTCAYYN	0.9731
307	EHF_HUMAN.H10MO.S	MWACCMGGAARTA	0.9824
308	NKX25_HUMAN.H10MO.C	TYAAGTG	0.985
309	PKNX1_HUMAN.H10MO.D	VRVTTGAYTGATK	0.9955
310	MEIS2_HUMAN.H10MO.B	TTGACAGBTGTCM	0.9959
311	TFDP1_HUMAN.H10MO.S	AWWKRGCGGGAAAY	0.9962
312	CENPB_HUMAN.H10MO.D	TTCGTWSBAHGCGGGWW	0.999
313	ZN282_HUMAN.H10MO.D	MGKRTTRTGGGARA	0.9991
314	OTX2_HUMAN.H10MO.C	KHDMWVGGATTARRK	0.9998
315	ATF3_HUMAN.H10MO.A	RTGACKYMA	0.9999
316	TEAD4_HUMAN.H10MO.A	RCATTCCWGVSMT	0.9999
317	PRGR_HUMAN.H10MO.S	AGAACAB	1
318	RORG_HUMAN.H10MO.C	DWAWGTRGGTCAG	1
319	JDP2_HUMAN.H10MO.D	BGATGACGTCAY	1
320	XBP1_HUMAN.H10MO.C	GACGTGKCMTWW	1
321	E2F2_HUMAN.H10MO.B	GGCGCGAAAC	1
322	STAT3_HUMAN.H10MO.A	YTTCCYGGAAR	1
323	BATF_HUMAN.H10MO.S	MTGAGTCAKW	1
324	MYB_HUMAN.H10MO.C	CAGTTRD	1
325	FOSL1_HUMAN.H10MO.A	DRTGACTCATN	1
326	NR1H2_HUMAN.H10MO.D	TAAAGGTCAAAGGTCAACK	1
327	GATA1_HUMAN.H10MO.A	CTGBNNVVBRSAGATAAGR	1
328	FOSL2_HUMAN.H10MO.A	RTGACTCABHN	1
329	ELK1_HUMAN.H10MO.A	RCCGGAAGT	1
330	BC11A_HUMAN.H10MO.C	RAAAGAGGAAGTGARAV	1
331	ATF7_HUMAN.H10MO.D	KRTGACGTCAT	1
332	NFYA_HUMAN.H10MO.A	YRRCCAATSAGMR	1
333	HINFP_HUMAN.H10MO.C	DMSHHMGCGGACGTTV	1
334	MYBB_HUMAN.H10MO.D	TRSMGGTTRW	1
335	EGR1_HUMAN.H10MO.S	BGCGKGGGCGG	1
336	ELK4_HUMAN.H10MO.A	ACCGGAAGTRN	1
337	ETV5_HUMAN.H10MO.D	GHCAGGAAGWAAY	1
338	ANDR_HUMAN.H10MO.A	DGBACABHCTGTTCYHK	1
339	CR3L2_HUMAN.H10MO.D	TGATGACGTGGCA	1
340	KAISO_HUMAN.H10MO.A	GYTCTCGCGAGRBYBVGGS	1
341	TFDP1_HUMAN.H10MO.D	SSSVSSGSGSVRGGGGCGGGRV	1
342	RXRA_HUMAN.H10MO.C	MWSTRGGDCAAAGGTCA	1
343	CEBPZ_HUMAN.H10MO.D	DCTSATTGGCT	1
344	NFYB_HUMAN.H10MO.A	YRRCCAATSAGMR	1
345	HLTF_HUMAN.H10MO.D	KANKGCTGSMAM	1
346	RFX3_HUMAN.H10MO.B	BGTTRCCATGGYRA	1
347	BHA15_HUMAN.H10MO.D	BDCCATATGKT	1
348	SPDEF_HUMAN.H10MO.D	RWCCMGGAWGWAGT	1
349	NR6A1_HUMAN.H10MO.B	AAGKTCAAGKTCA	1
350	NKX28_HUMAN.H10MO.C	TTCAAGKRC	1
351	MEIS3_HUMAN.H10MO.D	DKTGACAGSTK	1
352	KAISO_HUMAN.H10MO.S	YTSGCRGGARKH	1
353	ETS1_HUMAN.H10MO.C	ACMGGAAGT	1
354	PITX2_HUMAN.H10MO.D	TKGGATTAVH	1
355	SCRT1_HUMAN.H10MO.D	KCAACAGGTGGTH	1
356	AHR_HUMAN.H10MO.B	DTYGCGTGM	1
357	GCR_HUMAN.H10MO.S	AGAACAK	1
358	SP4_HUMAN.H10MO.D	GGGGGCGGGGCCKGGGSSGGGS	1
359	PRDM4_HUMAN.H10MO.D	KBGGGGGGCCTTGAAA	1
360	NDF2_HUMAN.H10MO.D	DBSRTATGDTS	1
361	CREB3_HUMAN.H10MO.D	KGRTGACGTGGCA	1
362	JUN_HUMAN.H10MO.A	VTGAGTCAB	1
363	BRCA1_HUMAN.H10MO.D	BKTSKGTTG	1
364	HXA1_HUMAN.H10MO.C	TKGATGGATG	1
365	RFX4_HUMAN.H10MO.D	SGTTGCCATGGYWAC	1
366	EHF_HUMAN.H10MO.C	RRAVVAGGAARTRRRRR	1
367	OTX1_HUMAN.H10MO.D	AGGATTAV	1
368	E2F1_HUMAN.H10MO.A	DDNDGGCGSGAAAV	1
369	PAX8_HUMAN.H10MO.D	BTVAYTSRMGYRKR	1
370	HIF1A_HUMAN.H10MO.A	SBSTACGTGCSB	1
371	TYY2_HUMAN.H10MO.D	AWAATGGCGGH	1
372	KLF13_HUMAN.H10MO.D	DRGKGGGCGKD	1
373	PRD14_HUMAN.H10MO.C	RRGTTAGRGACCYR	1
374	ATF2_HUMAN.H10MO.B	VTGACGTMA	1
375	MUSC_HUMAN.H10MO.D	CAGAAGACGGCATACGAB	1
376	MECP2_HUMAN.H10MO.C	SCCGGRR	1
377	PITX1_HUMAN.H10MO.D	DGGATTAAVGG	1
378	SPI1_HUMAN.H10MO.A	RRAAAGAGGAAGTGARA	1
379	IRF4_HUMAN.H10MO.C	RRRGRGGAASTGARAS	1
380	RORA_HUMAN.H10MO.B	WWAWBTAGGTCA	1
381	JUND_HUMAN.H10MO.A	RRTGAGTCAYH	1
382	TBX4_HUMAN.H10MO.D	RAGGTGTGAWAWNTVACACC	1
383	EOMES_HUMAN.H10MO.D	RRGAGGTGWKAA	1
384	CXXC1_HUMAN.H10MO.D	CGKTGKY	1
385	NFKB2_HUMAN.H10MO.D	GRAATBYCCCT	1
386	SCRT2_HUMAN.H10MO.D	RWGCAACAGGTGK	1
387	NFAT5_HUMAN.H10MO.D	SYGGAAAANTYCMTK	1
388	REL_HUMAN.H10MO.C	DKGGRNWTTCCM	1
389	TBR1_HUMAN.H10MO.D	RAAGGTGTGAAAW	1
390	E2F8_HUMAN.H10MO.D	TTTRGMGGGAAW	1
391	PRGR_HUMAN.H10MO.C	RGAACANYCTGTH	1
392	THAP1_HUMAN.H10MO.D	SGCCGCCATSTYGGSYBCGGGC	1
393	SP3_HUMAN.H10MO.B	SGVVGGGGGCGGGGCBRGSS	1
394	WT1_HUMAN.H10MO.D	GMGGGGGCGKGGG	1
395	ERR3_HUMAN.H10MO.B	TCAAGGTCA	1
396	SP2_HUMAN.H10MO.C	GGSSVGGGGGCGGGGCCDGSGS	1
397	SP1_HUMAN.H10MO.C	GGGRRGGGGGCGGGGCSDG	1
398	PAX1_HUMAN.H10MO.D	YSGTCACGCWTGANTGV	1
399	KLF14_HUMAN.H10MO.D	DRGKGGGCGTGGY	1
400	EGR4_HUMAN.H10MO.D	GGSGGYRGGGM	1
401	FOS_HUMAN.H10MO.A	RTGAGTCAYYN	1
402	NR4A2_HUMAN.H10MO.C	AAAGGTCAS	1
403	MAZ_HUMAN.H10MO.A	GGGMGGGGSSGGGGGGGGGGGG	1
404	MAFG_HUMAN.H10MO.C	AAAANTGCTGASTCAGCADWW	1
405	RXRG_HUMAN.H10MO.B	GGTCAAAGGTCAH	1
406	RUNX3_HUMAN.H10MO.C	NTYTGTGGTTW	1
407	HAND1_HUMAN.H10MO.D	GBRTCTGGMWTT	1
408	ZSCA4_HUMAN.H10MO.D	AGTGTGTGCACT	1
409	NR1I2_HUMAN.H10MO.C	DDRGGTYAANNRAGTTCAB	1
410	PPARG_HUMAN.H10MO.A	AWBTRGGKCAAAGGKCA	1
411	MCR_HUMAN.H10MO.D	HAGDMCWGGTTGWDGTR	1
412	EGR1_HUMAN.H10MO.A	GGGRDGYGKGGGHGGGRG	1
413	ZKSC3_HUMAN.H10MO.D	TYCGAGGCTAG	1
414	SUH_HUMAN.H10MO.C	SYGTGRGAAMN	1
415	SP1_HUMAN.H10MO.S	GGGGGCGGGGC	1
416	ZBTB4_HUMAN.H10MO.S	CAATRGCGDTKGYGR	1
417	TGIF2_HUMAN.H10MO.D	DTGACAGCTGT	1
418	NFYC_HUMAN.H10MO.B	YAGCCAATSAGVGS	1
419	BHE23_HUMAN.H10MO.D	RRSRTRTGKTDB	1
420	ETV7_HUMAN.H10MO.D	KCMHCAGGAAGTRACDY	1
421	TBX3_HUMAN.H10MO.D	AGKWAGRSAMTTAGGTSWKAARAA	1
422	GABP1_HUMAN.H10MO.C	CCGGAAGTGV	1
423	ELF3_HUMAN.H10MO.D	GGSAAACAGGAARY	1
424	MLX_HUMAN.H10MO.D	YGATCACGTGN	1
425	ZN639_HUMAN.H10MO.D	SRVKGCGCATGCGCAGVRVS	1
426	GABPA_HUMAN.H10MO.A	SVRCCGGAAGTGV	1
427	KLF16_HUMAN.H10MO.D	GGGGGYGKGKBGGGGGGGG	1
428	MYCN_HUMAN.H10MO.B	CCACGTGS	1
429	TAL1_HUMAN.H10MO.S	GAACAGATGGTC	1
430	TBX21_HUMAN.H10MO.D	RAGGTGTGAAWT	1
431	GCM2_HUMAN.H10MO.D	BATGCGGGTAB	1
432	P63_HUMAN.H10MO.S	GRRCWTGTCYS	1
433	ELF1_HUMAN.H10MO.A	GAACCMGGAAGTGS	1
434	NR2F6_HUMAN.H10MO.D	RGGWCAAAGKTCANNKRR	1
435	EGR3_HUMAN.H10MO.D	WGAGTGGGYGT	1
436	KLF6_HUMAN.H10MO.D	GGGGGCKG	1
437	ZEP2_HUMAN.H10MO.D	GGYDGGGWAACCSS	1
438	ZN148_HUMAN.H10MO.D	KGRGKGGGGGAGGGG	1
439	MAF_HUMAN.H10MO.B	KTGCTGAC	1
440	AP2D_HUMAN.H10MO.D	CGCCYGVGGCSCGT	1
441	TBX20_HUMAN.H10MO.D	AGGTGTGAAGGTGTGAA	1
442	TBX15_HUMAN.H10MO.D	GGGGGGGGGGGGGTGGGDR	1
443	ELF2_HUMAN.H10MO.C	VRRVSCGGAAGYRSVRS	1
444	GCR_HUMAN.H10MO.A	RGRACABKSTGTYCY	1
445	DDIT3_HUMAN.H10MO.C	GGGGATTGCAYBB	1
446	SPZ1_HUMAN.H10MO.D	CGGCKGWWACMBYGGG	1
447	PEBB_HUMAN.H10MO.C	TYTGTGGTYWB	1
448	ETV4_HUMAN.H10MO.B	SAGGAAGT	1
449	BHE40_HUMAN.H10MO.A	KCACGTGAS	1
450	PAX2_HUMAN.H10MO.S	SMRTGAC	1
451	TLX1_HUMAN.H10MO.S	YGBYAAKRWGS	1
452	ZN589_HUMAN.H10MO.D	CCMASGGKWWYWRCCS	1
453	RUNX2_HUMAN.H10MO.B	YTGTGGTTDGK	1
454	HES5_HUMAN.H10MO.D	YGGCACGTGYCR	1
455	FOSB_HUMAN.H10MO.C	GRTGACTCABH	1
456	TGIF1_HUMAN.H10MO.S	NTGACAG	1
457	TF7L1_HUMAN.H10MO.D	WDRDDMWWCGGGGMGV	1
458	EPAS1_HUMAN.H10MO.D	GTGHRTRCGTGKG	1
459	RHXF1_HUMAN.H10MO.D	NRGGGATYADS	1
460	TFE3_HUMAN.H10MO.C	RGTCAYGTGV	1
461	NR4A1_HUMAN.H10MO.C	VAAGGTCAS	1
462	E2F6_HUMAN.H10MO.C	NKGGCGGGARRG	1
463	ZBT18_HUMAN.H10MO.D	TCCAGATGTTBVSS	1
464	RUNX1_HUMAN.H10MO.A	BYTGTGGTTWB	1
465	EGR2_HUMAN.H10MO.C	DGMGTGGGCGG	1
466	RELB_HUMAN.H10MO.C	RGGGRMTTTCCM	1
467	FLI1_HUMAN.H10MO.A	RCMGGAAGYGGSK	1
468	NR1I3_HUMAN.H10MO.C	RRGGTCARVRRAGTTCAD	1
469	SRF_HUMAN.H10MO.A	MTTBKCCTTMTWTGGCCW	1
470	USF1_HUMAN.H10MO.A	GGTCACGTGR	1
471	NRL_HUMAN.H10MO.D	TGCTGACKYWR	1
472	RFX1_HUMAN.H10MO.C	GTTGCYAGGSAA	1
473	ETV1_HUMAN.H10MO.B	SSVGRCMGGAAGYRVVSSBSSS	1
474	PPARG_HUMAN.H10MO.S	MAWAGGTCA	1
475	HESX1_HUMAN.H10MO.D	ABSYGGCWMRTRRMMT	1
476	PPARD_HUMAN.H10MO.D	YAGGNBAAAGGTCA	1
477	PROX1_HUMAN.H10MO.D	KGGKARGGCGKSKKGGG	1
478	NR0B1_HUMAN.H10MO.D	GMGKGGGASR	1
479	TBX2_HUMAN.H10MO.D	TGVMWWCABAGGTGTGARRHGYSMC	1
480	ZN784_HUMAN.H10MO.D	DMGGTAGGTRV	1
481	TYY1_HUMAN.H10MO.A	CAARATGGCGGC	1
482	HES7_HUMAN.H10MO.D	TGGCACGTGCCG	1
483	BMAL1_HUMAN.H10MO.C	KGRACACGTGACYC	1
484	CR3L1_HUMAN.H10MO.D	GCCACGTGGCA	1
485	MAX_HUMAN.H10MO.A	RGYCACGTGST	1
486	ETS2_HUMAN.H10MO.C	VMVGGAAGTKS	1
487	HXB1_HUMAN.H10MO.D	TGATKGATGG	1
488	KLF4_HUMAN.H10MO.A	DGGGYGKGGC	1
489	CREM_HUMAN.H10MO.C	CRVTGACGTCA	1
490	ZEP1_HUMAN.H10MO.D	TGGGAAATCCCB	1
491	NFIA_HUMAN.H10MO.S	MTTGGCW	1
492	NF2L2_HUMAN.H10MO.D	VRTGACTCAGCA	1
493	TBX1_HUMAN.H10MO.D	GGGYGGGYAGGGGTGGGMDD	1
494	FOXK1_HUMAN.H10MO.D	KRTTGKGTSSGT	1
495	HEY1_HUMAN.H10MO.D	KGRCACGTGBCK	1
496	YBOX1_HUMAN.H10MO.D	BSKGATTSSCY	1
497	SPIC_HUMAN.H10MO.D	KVDRRWGGGKDRG	1
498	NKX21_HUMAN.H10MO.D	STCAAGKGCH	1
499	ERR2_HUMAN.H10MO.A	YCAAGGTCA	1
500	MYOG_HUMAN.H10MO.D	TRACAGCTGCWGC	1
501	MAFB_HUMAN.H10MO.D	WGCTGACDS	1
502	COT1_HUMAN.H10MO.B	CAAAGGTCA	1
503	HNF4G_HUMAN.H10MO.C	VRGKNCAAAGKYCA	1
504	NR1I3_HUMAN.H10MO.S	RAGKTCAB	1
505	ZFX_HUMAN.H10MO.C	SVGSSSSSCAGGCCBVGSC	1
506	PURA_HUMAN.H10MO.D	GGWRKKGGDGGGCVKGG	1
507	ZN219_HUMAN.H10MO.D	GDGGGGGGYGGA	1
508	MZF1_HUMAN.H10MO.D	RGDGGGGAW	1
509	TBX5_HUMAN.H10MO.D	AGGTGTGA	1
510	ZN524_HUMAN.H10MO.D	GGGTDCRAGGGTTCGAGK	1
511	ELK3_HUMAN.H10MO.D	VMCHGGAARTSC	1
512	ZIC4_HUMAN.H10MO.D	DCRCAGCGGGGGGTC	1
513	ENOA_HUMAN.H10MO.A	SRSCAYGTGKSHR	1
514	P63_HUMAN.H10MO.A	RRRCAWGYCTGGRCWTGYH	1
515	HNF4A_HUMAN.H10MO.A	RRGKBCAAAGTYCA	1
516	JUNB_HUMAN.H10MO.C	GBVTGAGTCAY	1
517	CLOCK_HUMAN.H10MO.D	GGDBKGGDGRSRCGKGTRGK	1
518	IKZF1_HUMAN.H10MO.C	BTGGGARR	1
519	AP2B_HUMAN.H10MO.B	GCCYGVGGGS	1
520	NR2C1_HUMAN.H10MO.C	GSYVAGAGGTCAB	1
521	HES1_HUMAN.H10MO.D	VMGVCACGMGMCM	1
522	TFE2_HUMAN.H10MO.C	AMCAGATGBYC	1
523	RFX2_HUMAN.H10MO.C	SSSSCSGTTGCCATGGMRACSG	1
524	MYC_HUMAN.H10MO.A	GASCACGTGGY	1
525	NFE2_HUMAN.H10MO.B	RSVATGACTCAGCA	1
526	NR4A3_HUMAN.H10MO.D	CAAAGGTCAS	1
527	MAFK_HUMAN.H10MO.S	TGCTGAGTCA	1
528	ATF6A_HUMAN.H10MO.B	GKGSTGACGTGG	1
529	MTF1_HUMAN.H10MO.C	MGKGCCGTGTGCAAARS	1
530	TFAP4_HUMAN.H10MO.C	RYCAGCTGYGG	1
531	NR2C2_HUMAN.H10MO.A	RGGTCARAGGTCA	1
532	PAX5_HUMAN.H10MO.A	SSVDRVKCAGCSRAGCGTGAC	1
533	RARG_HUMAN.H10MO.S	RAGGTCA	1
534	KLF15_HUMAN.H10MO.D	RSMKGGGAGDKGGGGSS	1
535	USF2_HUMAN.H10MO.A	GGGTCACGTGRBSVSSSSB	1
536	MITF_HUMAN.H10MO.C	RWCATGTGMB	1
537	HEN1_HUMAN.H10MO.C	BGGGKMKCAGCTGCGKCCYY	1
538	ASCL2_HUMAN.H10MO.D	KKGRGYRGSTGGKK	1
539	MNT_HUMAN.H10MO.D	RKRRRDKVAGGKGDDR	1
540	ZBTB4_HUMAN.H10MO.D	CCTAGATGGCAGGTGGG	1
541	GLIS2_HUMAN.H10MO.D	CKTCGCGGGGGGTM	1
542	STF1_HUMAN.H10MO.B	YCAAGGYCA	1
543	ZN740_HUMAN.H10MO.D	DKKGGGGGGGHRDK	1
544	PPARA_HUMAN.H10MO.C	RGGTCARAGGTCA	1
545	GLI3_HUMAN.H10MO.B	BTGGGTGGTCY	1
546	RREB1_HUMAN.H10MO.D	DKGKKKGKGGKTGKTTTGGGKT	1
547	P53_HUMAN.H10MO.B	RGRCATGTCTGGRCATGYCH	1
548	COT1_HUMAN.H10MO.S	GKBCAAAGGTCA	1
549	GCM1_HUMAN.H10MO.D	HWVATGCKGGYMBK	1
550	TLX1_HUMAN.H10MO.D	YYGGYAMBDDGCCAAGR	1
551	ZBT7B_HUMAN.H10MO.D	SSCSGTTGCCATGGVRACSGS	1
552	PLAG1_HUMAN.H10MO.D	GGRGGSMHNWVKAGGGG	1
553	HEY2_HUMAN.H10MO.D	GKBGGCWCGTGGCHTBV	1
554	KLF3_HUMAN.H10MO.D	HRCYWGGGTGKGGCT	1
555	NR1H4_HUMAN.H10MO.C	RRGGTCADTGACCT	1
556	TGIF1_HUMAN.H10MO.D	TGTSAGGTGTCASCTK	1
557	SMAD3_HUMAN.H10MO.C	STGTCTGKCY	1
558	GLIS1_HUMAN.H10MO.D	TCGTGGGGGGTMD	1
559	RFX5_HUMAN.H10MO.A	STCMBCWGTTGCYRGGVARA	1
560	GSC2_HUMAN.H10MO.D	RKMGGRTTRGB	1
561	SMAD2_HUMAN.H10MO.C	TGTCTGDCACCT	1
562	IRX2_HUMAN.H10MO.D	RCDKGKBDKGDCRKGTDVK	1
563	TF65_HUMAN.H10MO.A	GGGRMTTTCCM	1
564	BHE41_HUMAN.H10MO.D	WSVRKSYCACGTGMWGRRRV	1
565	ARNT2_HUMAN.H10MO.D	GNCGTGGSASRC	1
566	GLI2_HUMAN.H10MO.B	GTGGGTGGTCY	1
567	PTF1A_HUMAN.H10MO.C	CRGGRAAHWSMACASSTGYSC	1
568	AP2A_HUMAN.H10MO.C	ATKSCCTGRGGSHAD	1
569	AP2C_HUMAN.H10MO.A	VTGSCCTGRGGSHR	1
570	BACH1_HUMAN.H10MO.A	TGCTGAGTCABSS	1
571	COE1_HUMAN.H10MO.A	DRKYCCCWGGGGAVH	1
572	COT2_HUMAN.H10MO.A	CARAGGTCARRGD	1
573	COT2_HUMAN.H10MO.S	VAGGTCAARGGTCAM	1
574	CTCFL_HUMAN.H10MO.A	YBRCCASYAGRKGGCRSYV	1
575	CTCF_HUMAN.H10MO.A	YKRCCASYAGRKGGCRSYVB	1
576	ERR1_HUMAN.H10MO.D	GSCCAAGGTCASVS	1
577	ESR1_HUMAN.H10MO.A	MMAGGTCASVVTGHCCH	1
578	ESR1_HUMAN.H10MO.S	RGGTCASVSTGACCTGRS	1
579	ESR2_HUMAN.H10MO.A	VRGGTCASKSTGACCTKR	1
580	ESR2_HUMAN.H10MO.S	RGGTCAS	1
581	FIGLA_HUMAN.H10MO.D	DHMCAGGTGKT	1
582	GLI1_HUMAN.H10MO.C	BTGGGTGGTCY	1
583	GLIS3_HUMAN.H10MO.D	GYGGGGGGTM	1
584	HIC1_HUMAN.H10MO.C	GGGKTGCCC	1
585	HIC2_HUMAN.H10MO.D	HCRTGCCAGVN	1
586	HTF4_HUMAN.H10MO.B	VNSCAGGTGBG	1
587	ID4_HUMAN.H10MO.D	DNCAGGTGYNV	1
588	INSM1_HUMAN.H10MO.C	TGTMAGGGGGCR	1
589	ITF2_HUMAN.H10MO.B	VCAGGTGCD	1
590	KLF12_HUMAN.H10MO.D	DDGGGCGTGGYH	1
591	KLF1_HUMAN.H10MO.C	CAGGGTGKGGC	1
592	KLF8_HUMAN.H10MO.C	CAGGGKGTG	1
593	MAFA_HUMAN.H10MO.D	STGCTGACBMYGCAGYHTYCV	1
594	MESP1_HUMAN.H10MO.D	VCAGGTGKKBD	1
595	MLXPL_HUMAN.H10MO.D	GCAYGKGVCAMCSBCGTGB	1
596	MYF6_HUMAN.H10MO.C	GCAGSTG	1
597	MYOD1_HUMAN.H10MO.C	SCASCTGTY	1
598	NDF1_HUMAN.H10MO.C	CGGCAGRTGKSC	1
599	NFIA_HUMAN.H10MO.C	TTGGCHNRNWGCCAR	1
600	NFIC_HUMAN.H10MO.A	HYYTGGCWSNVDKCCMR	1
601	NFKB1_HUMAN.H10MO.B	GGGRAAKYCCC	1
602	NR5A2_HUMAN.H10MO.C	YYCAAGGYYA	1
603	P73_HUMAN.H10MO.A	RGRCATGYYTGGRCWTGYYB	1
604	P73_HUMAN.H10MO.S	GGGRCADGYYYB	1
605	PAX5_HUMAN.H10MO.S	GGCTGAGS	1
606	PKNX2_HUMAN.H10MO.D	DKGRCRGGTGKSA	1
607	PLAG1_HUMAN.H10MO.S	ARDGGGGGSHBYM	1
608	PLAL1_HUMAN.H10MO.D	CRGGGGGCCC	1
609	PPARA_HUMAN.H10MO.S	RAGGTCA	1
610	RARA_HUMAN.H10MO.C	RGGTCANSRRVAGGTCA	1
611	RARA_HUMAN.H10MO.S	SAGGTCA	1
612	RARB_HUMAN.H10MO.D	SAGGTCAVVVV	1
613	RARG_HUMAN.H10MO.C	GGRGKTCRVCNRVAGGTCAV	1
614	REST_HUMAN.H10MO.A	TTCAGCACCAYGGACAGCKCCM	1
615	RXRB_HUMAN.H10MO.C	TSAGGTCASR	1
616	SMAD1_HUMAN.H10MO.D	RSCCTGTCTGCC	1
617	SMAD4_HUMAN.H10MO.C	STGTCTSDCACCT	1
618	SMRC1_HUMAN.H10MO.D	SBVTGAGTCAB	1
619	SNAI1_HUMAN.H10MO.C	SCAGGTGK	1
620	SNAI2_HUMAN.H10MO.C	BCAGGTG	1
621	SRBP1_HUMAN.H10MO.B	GGTGGGGTGAB	1
622	SRBP2_HUMAN.H10MO.B	VSGTGGGGWGABG	1
623	TFCP2_HUMAN.H10MO.D	SCCTGMNCDSRCCRGA	1
624	THA_HUMAN.H10MO.C	RGGTCABYTSAGGTCAK	1
625	THA_HUMAN.H10MO.S	BTSAGGTCAS	1
626	THB_HUMAN.H10MO.C	GRSSYSASVTSAGGTCA	1
627	THB_HUMAN.H10MO.S	SGTSAGGTCA	1
628	TWST1_HUMAN.H10MO.D	MCCCAGGTGK	1
629	KLF6_HUMAN.H10MO.D	GGGGGCKG	1
630	VDR_HUMAN.H10MO.B	RRGGTCASNGRGKTCA	1
631	VDR_HUMAN.H10MO.S	GRGKTCA	1
632	ZBT7A_HUMAN.H10MO.D	MKCWSKGGGTNBMCBAG	1
633	ZBTB6_HUMAN.H10MO.D	VGRTGATRGAGCC	1
634	ZEB1_HUMAN.H10MO.B	NVCAGGTRDRN	1
635	ZIC1_HUMAN.H10MO.B	KGGGWGGTS	1
636	ZIC2_HUMAN.H10MO.C	KGGGTGGTC	1
637	ZIC3_HUMAN.H10MO.C	BGGGTGGYC	1
638	ZKSC1_HUMAN.H10MO.C	CCYGGCACAYAGTAGGTSCTCA	1
639	ZN143_HUMAN.H10MO.A	GCRWKGCATKMTGGGARDTVBH	1
640	ZN350_HUMAN.H10MO.C	ASGGGVVGCARDNVTTTGKKGCCC	1
641	ZN423_HUMAN.H10MO.D	GRCACCCWAGGGTGC	1

## Sheet: group 2
Rank order	Motif	Sequence	p-value
1	AP2B_HUMAN.H10MO.B	GCCYGVGGGS	3.211e-16
2	GLIS3_HUMAN.H10MO.D	GYGGGGGGTM	4.876e-16
3	PLAL1_HUMAN.H10MO.D	CRGGGGGCCC	5.088e-16
4	KLF6_HUMAN.H10MO.D	GGGGGCKG	3.088e-15
5	MBD2_HUMAN.H10MO.B	SSGKCCGGMGR	4.644e-15
6	ZIC2_HUMAN.H10MO.C	KGGGTGGTC	1.714e-14
7	AP2C_HUMAN.H10MO.A	VTGSCCTGRGGSHR	2.906e-14
8	CLOCK_HUMAN.H10MO.D	GGDBKGGDGRSRCGKGTRGK	4.067e-14
9	ZBT7A_HUMAN.H10MO.D	MKCWSKGGGTNBMCBAG	4.219e-14
10	ZIC1_HUMAN.H10MO.B	KGGGWGGTS	4.22e-14
11	CTCF_HUMAN.H10MO.A	YKRCCASYAGRKGGCRSYVB	5.164e-14
12	THAP1_HUMAN.H10MO.D	SGCCGCCATSTYGGSYBCGGGC	1.893e-13
13	HEN1_HUMAN.H10MO.C	BGGGKMKCAGCTGCGKCCYY	4.987e-13
14	ZN740_HUMAN.H10MO.D	DKKGGGGGGGHRDK	6.09e-13
15	EGR4_HUMAN.H10MO.D	GGSGGYRGGGM	3.843e-12
16	ZIC4_HUMAN.H10MO.D	DCRCAGCGGGGGGTC	5.341e-12
17	PLAG1_HUMAN.H10MO.D	GGRGGSMHNWVKAGGGG	7.165e-12
18	GLIS1_HUMAN.H10MO.D	TCGTGGGGGGTMD	1.192e-11
19	PLAG1_HUMAN.H10MO.S	ARDGGGGGSHBYM	2.407e-11
20	SRBP2_HUMAN.H10MO.B	VSGTGGGGWGABG	2.458e-11
21	INSM1_HUMAN.H10MO.C	TGTMAGGGGGCR	2.711e-11
22	GLIS2_HUMAN.H10MO.D	CKTCGCGGGGGGTM	2.737e-11
23	EGR1_HUMAN.H10MO.S	BGCGKGGGCGG	3.806e-11
24	MECP2_HUMAN.H10MO.C	SCCGGRR	2.274e-10
25	EGR2_HUMAN.H10MO.C	DGMGTGGGCGG	4.228e-10
26	WT1_HUMAN.H10MO.D	GMGGGGGCGKGGG	6.167e-10
27	SP4_HUMAN.H10MO.D	GGGGGCGGGGCCKGGGSSGGGS	1.01e-09
28	ZFX_HUMAN.H10MO.C	SVGSSSSSCAGGCCBVGSC	1.099e-09
29	ESR2_HUMAN.H10MO.A	VRGGTCASKSTGACCTKR	1.138e-09
30	KLF1_HUMAN.H10MO.C	CAGGGTGKGGC	1.351e-09
31	KLF13_HUMAN.H10MO.D	DRGKGGGCGKD	1.47e-09
32	CTCFL_HUMAN.H10MO.A	YBRCCASYAGRKGGCRSYV	1.56e-09
33	ZN639_HUMAN.H10MO.D	SRVKGCGCATGCGCAGVRVS	2.018e-09
34	TFDP1_HUMAN.H10MO.D	SSSVSSGSGSVRGGGGCGGGRV	4.87e-09
35	ZBTB4_HUMAN.H10MO.D	CCTAGATGGCAGGTGGG	1.007e-08
36	ZN219_HUMAN.H10MO.D	GDGGGGGGYGGA	1.251e-08
37	ZN148_HUMAN.H10MO.D	KGRGKGGGGGAGGGG	1.684e-08
38	KLF14_HUMAN.H10MO.D	DRGKGGGCGTGGY	1.754e-08
39	ESR1_HUMAN.H10MO.S	RGGTCASVSTGACCTGRS	2.042e-08
40	ZN423_HUMAN.H10MO.D	GRCACCCWAGGGTGC	2.122e-08
41	GSC2_HUMAN.H10MO.D	RKMGGRTTRGB	4.496e-08
42	MAZ_HUMAN.H10MO.A	GGGMGGGGSSGGGGGGGGGGGG	2.169e-07
43	ARNT2_HUMAN.H10MO.D	GNCGTGGSASRC	2.565e-07
44	REST_HUMAN.H10MO.A	TTCAGCACCAYGGACAGCKCCM	2.802e-07
45	KLF4_HUMAN.H10MO.A	DGGGYGKGGC	3.758e-07
46	KLF16_HUMAN.H10MO.D	GGGGGYGKGKBGGGGGGGG	4.298e-07
47	RREB1_HUMAN.H10MO.D	DKGKKKGKGGKTGKTTTGGGKT	5.39e-07
48	KAISO_HUMAN.H10MO.A	GYTCTCGCGAGRBYBVGGS	5.472e-07
49	COE1_HUMAN.H10MO.A	DRKYCCCWGGGGAVH	8.875e-07
50	RFX2_HUMAN.H10MO.C	SSSSCSGTTGCCATGGMRACSG	1.632e-06
51	TBX1_HUMAN.H10MO.D	GGGYGGGYAGGGGTGGGMDD	1.997e-06
52	NR0B1_HUMAN.H10MO.D	GMGKGGGASR	2.01e-06
53	NDF1_HUMAN.H10MO.C	CGGCAGRTGKSC	3.193e-06
54	E2F3_HUMAN.H10MO.B	SSCGCSAAAC	3.488e-06
55	PKNX2_HUMAN.H10MO.D	DKGRCRGGTGKSA	3.971e-06
56	ERR1_HUMAN.H10MO.D	GSCCAAGGTCASVS	4.422e-06
57	KLF15_HUMAN.H10MO.D	RSMKGGGAGDKGGGGSS	6.585e-06
58	GCM2_HUMAN.H10MO.D	BATGCGGGTAB	7.646e-06
59	E2F4_HUMAN.H10MO.A	NDDKGGCGSGAAAN	7.88e-06
60	ZKSC1_HUMAN.H10MO.C	CCYGGCACAYAGTAGGTSCTCA	8.013e-06
61	SP2_HUMAN.H10MO.C	GGSSVGGGGGCGGGGCCDGSGS	8.167e-06
62	ZIC3_HUMAN.H10MO.C	BGGGTGGYC	8.859e-06
63	PAX5_HUMAN.H10MO.A	SSVDRVKCAGCSRAGCGTGAC	1.06e-05
64	KLF12_HUMAN.H10MO.D	DDGGGCGTGGYH	1.165e-05
65	ETV1_HUMAN.H10MO.B	SSVGRCMGGAAGYRVVSSBSSS	1.413e-05
66	E2F6_HUMAN.H10MO.C	NKGGCGGGARRG	1.459e-05
67	SP1_HUMAN.H10MO.S	GGGGGCGGGGC	1.548e-05
68	HEY2_HUMAN.H10MO.D	GKBGGCWCGTGGCHTBV	1.813e-05
69	PROX1_HUMAN.H10MO.D	KGGKARGGCGKSKKGGG	2.372e-05
70	KLF8_HUMAN.H10MO.C	CAGGGKGTG	2.839e-05
71	TBX15_HUMAN.H10MO.D	GGGGGGGGGGGGGTGGGDR	3.887e-05
72	MZF1_HUMAN.H10MO.D	RGDGGGGAW	8.211e-05
73	HES1_HUMAN.H10MO.D	VMGVCACGMGMCM	0.0001003
74	NFIA_HUMAN.H10MO.C	TTGGCHNRNWGCCAR	0.0001044
75	TWST1_HUMAN.H10MO.D	MCCCAGGTGK	0.0001197
76	E2F1_HUMAN.H10MO.A	DDNDGGCGSGAAAV	0.0001359
77	AP2D_HUMAN.H10MO.D	CGCCYGVGGCSCGT	0.0001786
78	ZN524_HUMAN.H10MO.D	GGGTDCRAGGGTTCGAGK	0.0001797
79	ELF2_HUMAN.H10MO.C	VRRVSCGGAAGYRSVRS	0.0001958
80	AP2A_HUMAN.H10MO.C	ATKSCCTGRGGSHAD	0.0002131
81	MYC_HUMAN.H10MO.A	GASCACGTGGY	0.000225
82	PURA_HUMAN.H10MO.D	GGWRKKGGDGGGCVKGG	0.0002291
83	SP1_HUMAN.H10MO.C	GGGRRGGGGGCGGGGCSDG	0.0004439
84	HTF4_HUMAN.H10MO.B	VNSCAGGTGBG	0.0005728
85	EPAS1_HUMAN.H10MO.D	GTGHRTRCGTGKG	0.0005934
86	SP3_HUMAN.H10MO.B	SGVVGGGGGCGGGGCBRGSS	0.0009537
87	GLI2_HUMAN.H10MO.B	GTGGGTGGTCY	0.001062
88	EGR1_HUMAN.H10MO.A	GGGRDGYGKGGGHGGGRG	0.001267
89	PTF1A_HUMAN.H10MO.C	CRGGRAAHWSMACASSTGYSC	0.001279
90	NRF1_HUMAN.H10MO.A	SYGCGCMTGCGCRSBGSS	0.001488
91	ASCL2_HUMAN.H10MO.D	KKGRGYRGSTGGKK	0.001573
92	MYOD1_HUMAN.H10MO.C	SCASCTGTY	0.00237
93	ZN350_HUMAN.H10MO.C	ASGGGVVGCARDNVTTTGKKGCCC	0.003247
94	RARG_HUMAN.H10MO.C	GGRGKTCRVCNRVAGGTCAV	0.00388
95	IRX2_HUMAN.H10MO.D	RCDKGKBDKGDCRKGTDVK	0.004318
96	NFIC_HUMAN.H10MO.A	HYYTGGCWSNVDKCCMR	0.004866
97	GLI1_HUMAN.H10MO.C	BTGGGTGGTCY	0.004914
98	MESP1_HUMAN.H10MO.D	VCAGGTGKKBD	0.006532
99	MTF1_HUMAN.H10MO.C	MGKGCCGTGTGCAAARS	0.006821
100	HES5_HUMAN.H10MO.D	YGGCACGTGYCR	0.007425
101	SPIC_HUMAN.H10MO.D	KVDRRWGGGKDRG	0.01215
102	ITF2_HUMAN.H10MO.B	VCAGGTGCD	0.01673
103	MNT_HUMAN.H10MO.D	RKRRRDKVAGGKGDDR	0.01855
104	E2F2_HUMAN.H10MO.B	GGCGCGAAAC	0.01891
105	PAX5_HUMAN.H10MO.S	GGCTGAGS	0.01922
106	BHE41_HUMAN.H10MO.D	WSVRKSYCACGTGMWGRRRV	0.01967
107	FOXK1_HUMAN.H10MO.D	KRTTGKGTSSGT	0.02128
108	P73_HUMAN.H10MO.A	RGRCATGYYTGGRCWTGYYB	0.02201
109	ZEB1_HUMAN.H10MO.B	NVCAGGTRDRN	0.0244
110	PPARA_HUMAN.H10MO.C	RGGTCARAGGTCA	0.02526
111	BACH1_HUMAN.H10MO.A	TGCTGAGTCABSS	0.03231
112	SNAI1_HUMAN.H10MO.C	SCAGGTGK	0.03301
113	ELF1_HUMAN.H10MO.A	GAACCMGGAAGTGS	0.03926
114	P73_HUMAN.H10MO.S	GGGRCADGYYYB	0.04096
115	SMAD3_HUMAN.H10MO.C	STGTCTGKCY	0.0422
116	NR2C2_HUMAN.H10MO.A	RGGTCARAGGTCA	0.0548
117	TFCP2_HUMAN.H10MO.D	SCCTGMNCDSRCCRGA	0.05755
118	P63_HUMAN.H10MO.A	RRRCAWGYCTGGRCWTGYH	0.05958
119	MYOG_HUMAN.H10MO.D	TRACAGCTGCWGC	0.06456
120	ZBT7B_HUMAN.H10MO.D	SSCSGTTGCCATGGVRACSGS	0.06457
121	FLI1_HUMAN.H10MO.A	RCMGGAAGYGGSK	0.07905
122	ETS2_HUMAN.H10MO.C	VMVGGAAGTKS	0.08186
123	GLI3_HUMAN.H10MO.B	BTGGGTGGTCY	0.08486
124	SRBP1_HUMAN.H10MO.B	GGTGGGGTGAB	0.08539
125	TFAP4_HUMAN.H10MO.C	RYCAGCTGYGG	0.1249
126	HIC2_HUMAN.H10MO.D	HCRTGCCAGVN	0.1403
127	NFKB1_HUMAN.H10MO.B	GGGRAAKYCCC	0.1557
128	GABPA_HUMAN.H10MO.A	SVRCCGGAAGTGV	0.1615
129	ZN143_HUMAN.H10MO.A	GCRWKGCATKMTGGGARDTVBH	0.1837
130	ELK3_HUMAN.H10MO.D	VMCHGGAARTSC	0.1926
131	MLXPL_HUMAN.H10MO.D	GCAYGKGVCAMCSBCGTGB	0.2026
132	ZBTB4_HUMAN.H10MO.S	CAATRGCGDTKGYGR	0.2913
133	TFDP1_HUMAN.H10MO.S	AWWKRGCGGGAAAY	0.3124
134	HIC1_HUMAN.H10MO.C	GGGKTGCCC	0.3305
135	IKZF1_HUMAN.H10MO.C	BTGGGARR	0.3452
136	ESR1_HUMAN.H10MO.A	MMAGGTCASVVTGHCCH	0.389
137	THB_HUMAN.H10MO.C	GRSSYSASVTSAGGTCA	0.4053
138	KLF3_HUMAN.H10MO.D	HRCYWGGGTGKGGCT	0.4294
139	MYCN_HUMAN.H10MO.B	CCACGTGS	0.4612
140	TF7L1_HUMAN.H10MO.D	WDRDDMWWCGGGGMGV	0.4807
141	YBOX1_HUMAN.H10MO.D	BSKGATTSSCY	0.5662
142	SNAI2_HUMAN.H10MO.C	BCAGGTG	0.6555
143	HES7_HUMAN.H10MO.D	TGGCACGTGCCG	0.6807
144	ZN784_HUMAN.H10MO.D	DMGGTAGGTRV	0.6831
145	HEY1_HUMAN.H10MO.D	KGRCACGTGBCK	0.7442
146	RELB_HUMAN.H10MO.C	RGGGRMTTTCCM	0.7659
147	ID4_HUMAN.H10MO.D	DNCAGGTGYNV	0.8182
148	NR1H4_HUMAN.H10MO.C	RRGGTCADTGACCT	0.8259
149	GABP1_HUMAN.H10MO.C	CCGGAAGTGV	0.8592
150	HESX1_HUMAN.H10MO.D	ABSYGGCWMRTRRMMT	0.8678
151	ZN589_HUMAN.H10MO.D	CCMASGGKWWYWRCCS	0.8717
152	REL_HUMAN.H10MO.C	DKGGRNWTTCCM	0.9622
153	MLX_HUMAN.H10MO.D	YGATCACGTGN	0.9632
154	MYF6_HUMAN.H10MO.C	GCAGSTG	0.9667
155	RARA_HUMAN.H10MO.C	RGGTCANSRRVAGGTCA	0.9761
156	PPARD_HUMAN.H10MO.D	YAGGNBAAAGGTCA	0.9835
157	NR5A2_HUMAN.H10MO.C	YYCAAGGYYA	0.9876
158	FIGLA_HUMAN.H10MO.D	DHMCAGGTGKT	0.9881
159	SMRC1_HUMAN.H10MO.D	SBVTGAGTCAB	0.9885
160	HNF4G_HUMAN.H10MO.C	VRGKNCAAAGKYCA	0.9888
161	NR2C1_HUMAN.H10MO.C	GSYVAGAGGTCAB	0.9904
162	RFX5_HUMAN.H10MO.A	STCMBCWGTTGCYRGGVARA	0.9935
163	EGR3_HUMAN.H10MO.D	WGAGTGGGYGT	0.9959
164	SMAD1_HUMAN.H10MO.D	RSCCTGTCTGCC	0.9985
165	USF2_HUMAN.H10MO.A	GGGTCACGTGRBSVSSSSB	0.9986
166	ZBTB6_HUMAN.H10MO.D	VGRTGATRGAGCC	0.9988
167	HLTF_HUMAN.H10MO.D	KANKGCTGSMAM	0.9998
168	SMAD4_HUMAN.H10MO.C	STGTCTSDCACCT	0.9998
169	MAFA_HUMAN.H10MO.D	STGCTGACBMYGCAGYHTYCV	0.9999
170	THA_HUMAN.H10MO.S	BTSAGGTCAS	0.9999
171	TGIF1_HUMAN.H10MO.D	TGTSAGGTGTCASCTK	1
172	VDR_HUMAN.H10MO.B	RRGGTCASNGRGKTCA	1
173	TLX1_HUMAN.H10MO.D	YYGGYAMBDDGCCAAGR	1
174	HIF1A_HUMAN.H10MO.A	SBSTACGTGCSB	1
175	HAND1_HUMAN.H10MO.D	GBRTCTGGMWTT	1
176	COT1_HUMAN.H10MO.B	CAAAGGTCA	1
177	MAX_HUMAN.H10MO.A	RGYCACGTGST	1
178	THA_HUMAN.H10MO.C	RGGTCABYTSAGGTCAK	1
179	ETV4_HUMAN.H10MO.B	SAGGAAGT	1
180	ZKSC3_HUMAN.H10MO.D	TYCGAGGCTAG	1
181	CR3L1_HUMAN.H10MO.D	GCCACGTGGCA	1
182	SUH_HUMAN.H10MO.C	SYGTGRGAAMN	1
183	PPARG_HUMAN.H10MO.S	MAWAGGTCA	1
184	TF65_HUMAN.H10MO.A	GGGRMTTTCCM	1
185	RXRB_HUMAN.H10MO.C	TSAGGTCASR	1
186	P63_HUMAN.H10MO.S	GRRCWTGTCYS	1
187	BHE40_HUMAN.H10MO.A	KCACGTGAS	1
188	SMAD2_HUMAN.H10MO.C	TGTCTGDCACCT	1
189	HNF4A_HUMAN.H10MO.A	RRGKBCAAAGTYCA	1
190	ZSCA4_HUMAN.H10MO.D	AGTGTGTGCACT	1
191	RFX1_HUMAN.H10MO.C	GTTGCYAGGSAA	1
192	MAFB_HUMAN.H10MO.D	WGCTGACDS	1
193	TFE2_HUMAN.H10MO.C	AMCAGATGBYC	1
194	ELK1_HUMAN.H10MO.A	RCCGGAAGT	1
195	BMAL1_HUMAN.H10MO.C	KGRACACGTGACYC	1
196	ZEP2_HUMAN.H10MO.D	GGYDGGGWAACCSS	1
197	XBP1_HUMAN.H10MO.C	GACGTGKCMTWW	1
198	COT2_HUMAN.H10MO.A	CARAGGTCARRGD	1
199	KAISO_HUMAN.H10MO.S	YTSGCRGGARKH	1
200	HINFP_HUMAN.H10MO.C	DMSHHMGCGGACGTTV	1
201	PEBB_HUMAN.H10MO.C	TYTGTGGTYWB	1
202	CREM_HUMAN.H10MO.C	CRVTGACGTCA	1
203	P53_HUMAN.H10MO.B	RGRCATGTCTGGRCATGYCH	1
204	ENOA_HUMAN.H10MO.A	SRSCAYGTGKSHR	1
205	RARB_HUMAN.H10MO.D	SAGGTCAVVVV	1
206	CR3L2_HUMAN.H10MO.D	TGATGACGTGGCA	1
207	SPZ1_HUMAN.H10MO.D	CGGCKGWWACMBYGGG	1
208	ATF6A_HUMAN.H10MO.B	GKGSTGACGTGG	1
209	THB_HUMAN.H10MO.S	SGTSAGGTCA	1
210	EHF_HUMAN.H10MO.C	RRAVVAGGAARTRRRRR	1
211	ESR2_HUMAN.H10MO.S	RGGTCAS	1
212	PAX2_HUMAN.H10MO.S	SMRTGAC	1
213	STF1_HUMAN.H10MO.B	YCAAGGYCA	1
214	GCM1_HUMAN.H10MO.D	HWVATGCKGGYMBK	1
215	ARNT_HUMAN.H10MO.B	BYRCGTGC	1
216	RHXF1_HUMAN.H10MO.D	NRGGGATYADS	1
217	IRF4_HUMAN.H10MO.C	RRRGRGGAASTGARAS	1
218	CXXC1_HUMAN.H10MO.D	CGKTGKY	1
219	CENPB_HUMAN.H10MO.D	TTCGTWSBAHGCGGGWW	1
220	SCRT1_HUMAN.H10MO.D	KCAACAGGTGGTH	1
221	COT2_HUMAN.H10MO.S	VAGGTCAARGGTCAM	1
222	RARA_HUMAN.H10MO.S	SAGGTCA	1
223	PPARG_HUMAN.H10MO.A	AWBTRGGKCAAAGGKCA	1
224	NR4A3_HUMAN.H10MO.D	CAAAGGTCAS	1
225	E2F7_HUMAN.H10MO.D	WWDGGCGCGAAAM	1
226	VDR_HUMAN.H10MO.S	GRGKTCA	1
227	TBX5_HUMAN.H10MO.D	AGGTGTGA	1
228	TYY2_HUMAN.H10MO.D	AWAATGGCGGH	1
229	COT1_HUMAN.H10MO.S	GKBCAAAGGTCA	1
230	E4F1_HUMAN.H10MO.D	YGTKACGTC	1
231	NKX21_HUMAN.H10MO.D	STCAAGKGCH	1
232	TGIF1_HUMAN.H10MO.S	NTGACAG	1
233	NFE2_HUMAN.H10MO.B	RSVATGACTCAGCA	1
234	EHF_HUMAN.H10MO.S	MWACCMGGAARTA	1
235	CREB3_HUMAN.H10MO.D	KGRTGACGTGGCA	1
236	E2F5_HUMAN.H10MO.B	SGCGCSAAAH	1
237	MAFK_HUMAN.H10MO.S	TGCTGAGTCA	1
238	USF1_HUMAN.H10MO.A	GGTCACGTGR	1
239	ETV7_HUMAN.H10MO.D	KCMHCAGGAAGTRACDY	1
240	ZBT18_HUMAN.H10MO.D	TCCAGATGTTBVSS	1
241	MCR_HUMAN.H10MO.D	HAGDMCWGGTTGWDGTR	1
242	BHE23_HUMAN.H10MO.D	RRSRTRTGKTDB	1
243	ETV5_HUMAN.H10MO.D	GHCAGGAAGWAAY	1
244	GCR_HUMAN.H10MO.A	RGRACABKSTGTYCY	1
245	ZEP1_HUMAN.H10MO.D	TGGGAAATCCCB	1
246	NKX28_HUMAN.H10MO.C	TTCAAGKRC	1
247	NDF2_HUMAN.H10MO.D	DBSRTATGDTS	1
248	ELK4_HUMAN.H10MO.A	ACCGGAAGTRN	1
249	ETS1_HUMAN.H10MO.C	ACMGGAAGT	1
250	TFE3_HUMAN.H10MO.C	RGTCAYGTGV	1
251	SPI1_HUMAN.H10MO.A	RRAAAGAGGAAGTGARA	1
252	TAL1_HUMAN.H10MO.S	GAACAGATGGTC	1
253	E2F8_HUMAN.H10MO.D	TTTRGMGGGAAW	1
254	ETV6_HUMAN.H10MO.D	WVCCGGAAGTR	1
255	ERG_HUMAN.H10MO.B	RRACCGGAARTSV	1
256	TBX2_HUMAN.H10MO.D	TGVMWWCABAGGTGTGARRHGYSMC	1
257	MITF_HUMAN.H10MO.C	RWCATGTGMB	1
258	NFKB2_HUMAN.H10MO.D	GRAATBYCCCT	1
259	SCRT2_HUMAN.H10MO.D	RWGCAACAGGTGK	1
260	FOSL2_HUMAN.H10MO.A	RTGACTCABHN	1
261	NR1I3_HUMAN.H10MO.C	RRGGTCARVRRAGTTCAD	1
262	NFAT5_HUMAN.H10MO.D	SYGGAAAANTYCMTK	1
263	SPDEF_HUMAN.H10MO.D	RWCCMGGAWGWAGT	1
264	TBX20_HUMAN.H10MO.D	AGGTGTGAAGGTGTGAA	1
265	NRL_HUMAN.H10MO.D	TGCTGACKYWR	1
266	RARG_HUMAN.H10MO.S	RAGGTCA	1
267	JUN_HUMAN.H10MO.A	VTGAGTCAB	1
268	ELF3_HUMAN.H10MO.D	GGSAAACAGGAARY	1
269	STAT1_HUMAN.H10MO.S	SDYTTCCRGGAAAYS	1
270	TFEB_HUMAN.H10MO.C	RGTCACGTG	1
271	PPARA_HUMAN.H10MO.S	RAGGTCA	1
272	FOS_HUMAN.H10MO.A	RTGAGTCAYYN	1
273	NFYC_HUMAN.H10MO.B	YAGCCAATSAGVGS	1
274	ZN282_HUMAN.H10MO.D	MGKRTTRTGGGARA	1
275	CUX1_HUMAN.H10MO.C	RBRSBDATCGATSK	1
276	NR1I2_HUMAN.H10MO.C	DDRGGTYAANNRAGTTCAB	1
277	NR4A1_HUMAN.H10MO.C	VAAGGTCAS	1
278	RUNX1_HUMAN.H10MO.A	BYTGTGGTTWB	1
279	JUNB_HUMAN.H10MO.C	GBVTGAGTCAY	1
280	ATF1_HUMAN.H10MO.B	NRTGACGTMAK	1
281	TLX1_HUMAN.H10MO.S	YGBYAAKRWGS	1
282	RFX4_HUMAN.H10MO.D	SGTTGCCATGGYWAC	1
283	ZSC16_HUMAN.H10MO.D	RRGGTGYTCTGTTAACAMTW	1
284	GRHL1_HUMAN.H10MO.D	AACCGGTTTDDC	1
285	STAT3_HUMAN.H10MO.A	YTTCCYGGAAR	1
286	NR1H2_HUMAN.H10MO.D	TAAAGGTCAAAGGTCAACK	1
287	NR2F6_HUMAN.H10MO.D	RGGWCAAAGKTCANNKRR	1
288	PRD14_HUMAN.H10MO.C	RRGTTAGRGACCYR	1
289	TBX3_HUMAN.H10MO.D	AGKWAGRSAMTTAGGTSWKAARAA	1
290	PBX3_HUMAN.H10MO.B	YBYTGATTGRYTGR	1
291	NFIA_HUMAN.H10MO.S	MTTGGCW	1
292	HME2_HUMAN.H10MO.D	NNTRRTTARNB	1
293	MUSC_HUMAN.H10MO.D	CAGAAGACGGCATACGAB	1
294	NFYB_HUMAN.H10MO.A	YRRCCAATSAGMR	1
295	FOSL1_HUMAN.H10MO.A	DRTGACTCATN	1
296	MYBB_HUMAN.H10MO.D	TRSMGGTTRW	1
297	NKX32_HUMAN.H10MO.C	AGYTAAGTGGV	1
298	HXB1_HUMAN.H10MO.D	TGATKGATGG	1
299	PRDM4_HUMAN.H10MO.D	KBGGGGGGCCTTGAAA	1
300	MAF_HUMAN.H10MO.B	KTGCTGAC	1
301	NF2L2_HUMAN.H10MO.D	VRTGACTCAGCA	1
302	RXRA_HUMAN.H10MO.C	MWSTRGGDCAAAGGTCA	1
303	IRF8_HUMAN.H10MO.D	GRGRAAVTGAAASYR	1
304	NR6A1_HUMAN.H10MO.B	AAGKTCAAGKTCA	1
305	JDP2_HUMAN.H10MO.D	BGATGACGTCAY	1
306	NR1I3_HUMAN.H10MO.S	RAGKTCAB	1
307	ATF7_HUMAN.H10MO.D	KRTGACGTCAT	1
308	ATF2_HUMAN.H10MO.B	VTGACGTMA	1
309	STAT1_HUMAN.H10MO.A	YCMTTTCCHGGAAAWCHCATKM	1
310	JUND_HUMAN.H10MO.A	RRTGAGTCAYH	1
311	RUNX2_HUMAN.H10MO.B	YTGTGGTTDGK	1
312	BC11A_HUMAN.H10MO.C	RAAAGAGGAAGTGARAV	1
313	PAX8_HUMAN.H10MO.D	BTVAYTSRMGYRKR	1
314	MYB_HUMAN.H10MO.C	CAGTTRD	1
315	OTX1_HUMAN.H10MO.D	AGGATTAV	1
316	CREB1_HUMAN.H10MO.A	TKACGTCAYYN	1
317	ZBED1_HUMAN.H10MO.D	YATGTCGCGAYAK	1
318	RFX3_HUMAN.H10MO.B	BGTTRCCATGGYRA	1
319	PKNX1_HUMAN.H10MO.D	VRVTTGAYTGATK	1
320	GMEB2_HUMAN.H10MO.D	NBKTACGTVRN	1
321	NFYA_HUMAN.H10MO.A	YRRCCAATSAGMR	1
322	TEAD1_HUMAN.H10MO.D	YACATTCCWSMKSH	1
323	CEBPB_HUMAN.H10MO.A	KATTGCRYAAYH	1
324	NR4A2_HUMAN.H10MO.C	AAAGGTCAS	1
325	AHR_HUMAN.H10MO.B	DTYGCGTGM	1
326	BRCA1_HUMAN.H10MO.D	BKTSKGTTG	1
327	ZN410_HUMAN.H10MO.D	TATTATGGGATGK	1
328	CREB5_HUMAN.H10MO.D	RRTGACGTMAT	1
329	FOSB_HUMAN.H10MO.C	GRTGACTCABH	1
330	NFAC3_HUMAN.H10MO.B	TGGAAAAHY	1
331	ATF3_HUMAN.H10MO.A	RTGACKYMA	1
332	ERR2_HUMAN.H10MO.A	YCAAGGTCA	1
333	BCL6B_HUMAN.H10MO.D	HYGCTTTCKAG	1
334	CEBPZ_HUMAN.H10MO.D	DCTSATTGGCT	1
335	MAFG_HUMAN.H10MO.C	AAAANTGCTGASTCAGCADWW	1
336	FEV_HUMAN.H10MO.C	CAGGAARTDA	1
337	NR1I2_HUMAN.H10MO.S	RAGTTCAB	1
338	ANDR_HUMAN.H10MO.A	DGBACABHCTGTTCYHK	1
339	DDIT3_HUMAN.H10MO.C	GGGGATTGCAYBB	1
340	ISL1_HUMAN.H10MO.D	SYTAATR	1
341	MAFG_HUMAN.H10MO.S	MATGACT	1
342	TGIF2_HUMAN.H10MO.D	DTGACAGCTGT	1
343	HSF4_HUMAN.H10MO.D	TRGAABVTTCTAGAA	1
344	BHA15_HUMAN.H10MO.D	BDCCATATGKT	1
345	PRGR_HUMAN.H10MO.C	RGAACANYCTGTH	1
346	GSC_HUMAN.H10MO.D	ADSGGATTARB	1
347	PAX1_HUMAN.H10MO.D	YSGTCACGCWTGANTGV	1
348	TAL1_HUMAN.H10MO.A	CTGKNNNNNDSWGATAAGV	1
349	OVOL1_HUMAN.H10MO.C	KGTAACKGT	1
350	SOX4_HUMAN.H10MO.C	CSCTTTGTTCTC	1
351	EOMES_HUMAN.H10MO.D	RRGAGGTGWKAA	1
352	RUNX3_HUMAN.H10MO.C	NTYTGTGGTTW	1
353	BATF_HUMAN.H10MO.S	MTGAGTCAKW	1
354	DPRX_HUMAN.H10MO.D	VSGGATTADCB	1
355	ETV3_HUMAN.H10MO.D	KWMRTTTGCACTTC	1
356	PAX6_HUMAN.H10MO.D	TSAWGCGTRAA	1
357	CEBPE_HUMAN.H10MO.A	TTKCGHAATMTB	1
358	NF2L1_HUMAN.H10MO.C	NATGACD	1
359	CRX_HUMAN.H10MO.C	VRGATTAR	1
360	RXRG_HUMAN.H10MO.B	GGTCAAAGGTCAH	1
361	BATF3_HUMAN.H10MO.D	HHTYRYTTACGK	1
362	HOMEZ_HUMAN.H10MO.D	WWWAATCGTTTTYTW	1
363	NR2E1_HUMAN.H10MO.D	DMTTGACTTWTTGACTT	1
364	GFI1_HUMAN.H10MO.C	GCWSTGATTT	1
365	GFI1B_HUMAN.H10MO.C	WGCAGTGATTT	1
366	ELF5_HUMAN.H10MO.D	AHMAGGAWRTW	1
367	PRRX1_HUMAN.H10MO.D	TAAYCTG	1
368	TCF7_HUMAN.H10MO.C	ASWWCAAAGSRB	1
369	HXB2_HUMAN.H10MO.D	WAGAAYVTTCTAGAA	1
370	TBX4_HUMAN.H10MO.D	RAGGTGTGAWAWNTVACACC	1
371	SOX10_HUMAN.H10MO.D	BCWTTGT	1
372	IRF1_HUMAN.H10MO.A	RAAASNGAAAGTGAAASTRR	1
373	NKX23_HUMAN.H10MO.D	BTYAAGTGGKW	1
374	HLF_HUMAN.H10MO.C	GRTTRYGTAAYMS	1
375	BRAC_HUMAN.H10MO.D	RSAWWGTGACACCTAGGTGTGAAAT	1
376	TEAD4_HUMAN.H10MO.A	RCATTCCWGVSMT	1
377	GCR_HUMAN.H10MO.S	AGAACAK	1
378	TYY1_HUMAN.H10MO.A	CAARATGGCGGC	1
379	PO6F2_HUMAN.H10MO.D	KWTAATKAGST	1
380	SRF_HUMAN.H10MO.A	MTTBKCCTTMTWTGGCCW	1
381	STA5A_HUMAN.H10MO.B	YTTCYKRGAAW	1
382	GATA1_HUMAN.H10MO.A	CTGBNNVVBRSAGATAAGR	1
383	STAT4_HUMAN.H10MO.D	YTTCYYRGAAR	1
384	ATOH1_HUMAN.H10MO.D	YRMCATATGYY	1
385	LBX2_HUMAN.H10MO.D	RYTAATTRGBY	1
386	FOXH1_HUMAN.H10MO.A	TGTGGATTSNR	1
387	NFAC1_HUMAN.H10MO.S	HGGAAAWTTCCAT	1
388	SPIB_HUMAN.H10MO.B	ARAAASMGGAAS	1
389	TBX19_HUMAN.H10MO.D	WWTTCRCACVTAGGTGTGAAWW	1
390	HSF2_HUMAN.H10MO.A	VGAABRTTCTAGAA	1
391	ERF_HUMAN.H10MO.D	WASAKKWSKTWSGRBAYTTC	1
392	PDX1_HUMAN.H10MO.C	RGTAATTAG	1
393	MEIS3_HUMAN.H10MO.D	DKTGACAGSTK	1
394	NFAC4_HUMAN.H10MO.C	DGGAAAAYTW	1
395	FOXI1_HUMAN.H10MO.B	YTBTGATTGGYY	1
396	PRDM1_HUMAN.H10MO.C	RAAAGTGAAAGTGA	1
397	HXD13_HUMAN.H10MO.D	TTTATTAGRGA	1
398	HMBX1_HUMAN.H10MO.D	DVCTRGTTAMN	1
399	HXA1_HUMAN.H10MO.C	TKGATGGATG	1
400	RORG_HUMAN.H10MO.C	DWAWGTRGGTCAG	1
401	HBP1_HUMAN.H10MO.D	AYYCATTGA	1
402	PRGR_HUMAN.H10MO.S	AGAACAB	1
403	VSX2_HUMAN.H10MO.D	TAATTAGCTHW	1
404	TBR1_HUMAN.H10MO.D	RAAGGTGTGAAAW	1
405	HSFY1_HUMAN.H10MO.D	WWTCGAACGWWW	1
406	MGAP_HUMAN.H10MO.D	AGGTGTGAAWTTTCAC	1
407	RORA_HUMAN.H10MO.B	WWAWBTAGGTCA	1
408	BHE22_HUMAN.H10MO.D	AVCATATGTTTTT	1
409	OLIG2_HUMAN.H10MO.D	RCCATATGKTT	1
410	ZN713_HUMAN.H10MO.D	RWAGAARAADGVSANGMAA	1
411	PO4F2_HUMAN.H10MO.D	YATTAATGAGYTK	1
412	STAT2_HUMAN.H10MO.B	TYASTTTCNBTTYCH	1
413	STA5B_HUMAN.H10MO.C	YTTCTKRGAAR	1
414	VAX2_HUMAN.H10MO.D	CACTAATTAVSYTWWH	1
415	ERR3_HUMAN.H10MO.B	TCAAGGTCA	1
416	PITX2_HUMAN.H10MO.D	TKGGATTAVH	1
417	HSF1_HUMAN.H10MO.A	RGAANVTTCYAGAA	1
418	MYBA_HUMAN.H10MO.D	HRACCGTTAAM	1
419	CEBPG_HUMAN.H10MO.C	ATTDTGCAATCTB	1
420	MEOX2_HUMAN.H10MO.D	TTAATKAYBWT	1
421	BCL6_HUMAN.H10MO.C	DARDRCTTTCYWGGAA	1
422	GATA2_HUMAN.H10MO.A	RSAGATAAGVV	1
423	OLIG3_HUMAN.H10MO.D	ACCATATGKTB	1
424	NKX25_HUMAN.H10MO.C	TYAAGTG	1
425	NOBOX_HUMAN.H10MO.C	HTAATTRSY	1
426	TBX21_HUMAN.H10MO.D	RAGGTGTGAAWT	1
427	SOX15_HUMAN.H10MO.D	CWTTGTT	1
428	PITX1_HUMAN.H10MO.D	DGGATTAAVGG	1
429	DLX2_HUMAN.H10MO.D	ATAATTRB	1
430	PITX3_HUMAN.H10MO.D	RGGGDWTWAAGGGATTAR	1
431	HXA2_HUMAN.H10MO.D	NGTAATTARBD	1
432	PAX2_HUMAN.H10MO.D	RHTCAGTSAYGMGTGAYW	1
433	DLX3_HUMAN.H10MO.C	GMTAATTRSW	1
434	MEIS1_HUMAN.H10MO.C	TGACAGBTTWAHG	1
435	MEIS2_HUMAN.H10MO.B	TTGACAGBTGTCM	1
436	ARI5B_HUMAN.H10MO.C	DBYKDGTATTSKR	1
437	GATA4_HUMAN.H10MO.B	RSWGATAAV	1
438	NFAC2_HUMAN.H10MO.B	TGGAAAAWY	1
439	NANOG_HUMAN.H10MO.S	KTTAATGG	1
440	TF7L2_HUMAN.H10MO.A	KBYCTTTGAWSTB	1
441	ZBT49_HUMAN.H10MO.D	NBSNTAATTRV	1
442	GATA1_HUMAN.H10MO.S	DSAGATAAGR	1
443	IRF2_HUMAN.H10MO.C	SGAAAGYGAAASYR	1
444	MAFK_HUMAN.H10MO.A	RAAWNTGCTGASTCAGCAWWWW	1
445	RX_HUMAN.H10MO.D	TTAATTRRYWA	1
446	NGN2_HUMAN.H10MO.D	AMCATATGYYWHH	1
447	HXD3_HUMAN.H10MO.D	NGKTAATTAGK	1
448	VENTX_HUMAN.H10MO.D	YVYTAATYGSTTHHHWWTT	1
449	NKX62_HUMAN.H10MO.D	NDTTAATKASN	1
450	CEBPD_HUMAN.H10MO.B	RRTKDBGCAAT	1
451	ZN652_HUMAN.H10MO.D	AARGGGTTAAW	1
452	NR2E3_HUMAN.H10MO.C	AAAGTCAAAAGTCA	1
453	NOTO_HUMAN.H10MO.D	RTTAATTAGNT	1
454	IRF3_HUMAN.H10MO.C	GGAAAGBGAAASBRRRA	1
455	GATA3_HUMAN.H10MO.C	WVAGATAAVAW	1
456	FOXC2_HUMAN.H10MO.D	GTTTGTTTWSHYAGR	1
457	MAFF_HUMAN.H10MO.A	AWWWHTGCTGASTCAGCAWWWW	1
458	LEF1_HUMAN.H10MO.C	CTTTGWW	1
459	HXA7_HUMAN.H10MO.D	VMTCRATMGATTGGM	1
460	FOXA2_HUMAN.H10MO.A	TGTTTACWYWG	1
461	CEBPA_HUMAN.H10MO.A	DRTTGTGCAAYHW	1
462	NKX22_HUMAN.H10MO.D	KTYAAGTRSTTD	1
463	PBX1_HUMAN.H10MO.B	WAWTTGATTGATGDB	1
464	OTX2_HUMAN.H10MO.C	KHDMWVGGATTARRK	1
465	BARX2_HUMAN.H10MO.D	TYRWTAATKR	1
466	SOX17_HUMAN.H10MO.D	CAAMAATNHHCATTGTCS	1
467	FOXO6_HUMAN.H10MO.D	WWSWTGTTTACRT	1
468	SOX18_HUMAN.H10MO.D	SHWHVMWTTGTTBTYKTCC	1
469	ISL2_HUMAN.H10MO.D	YVYTAAKTGCW	1
470	HXC8_HUMAN.H10MO.D	YTTSATTRATDSSC	1
471	LHX4_HUMAN.H10MO.D	DNRYTAATTRN	1
472	BPTF_HUMAN.H10MO.D	KKTBTTGTKKKS	1
473	AIRE_HUMAN.H10MO.C	HTTGGWWWWAWTGGDTWH	1
474	SOX3_HUMAN.H10MO.D	WSAATGBWATTSW	1
475	TEAD3_HUMAN.H10MO.D	GAHATTYYWGCYBYW	1
476	HXA9_HUMAN.H10MO.D	TGACAGTTTWAYGR	1
477	OLIG1_HUMAN.H10MO.D	AMCATATGTTTTTY	1
478	IRF7_HUMAN.H10MO.C	GAAASYGAAA	1
479	HXA10_HUMAN.H10MO.C	KATRRTTTATGW	1
480	ZN232_HUMAN.H10MO.D	TGTTAAAYGTAGATTAAGY	1
481	HMX3_HUMAN.H10MO.D	NNTTAATTGST	1
482	BATF_HUMAN.H10MO.A	ABTYYYRDWATGASTCAK	1
483	STAT6_HUMAN.H10MO.C	TTCYYHGGAAWYY	1
484	EMX2_HUMAN.H10MO.D	TAATTAGYDWAW	1
485	HXB6_HUMAN.H10MO.D	AWTGATTKATGMM	1
486	FOXP2_HUMAN.H10MO.A	BTGTTTACN	1
487	PRRX2_HUMAN.H10MO.C	YTAATTR	1
488	GATA6_HUMAN.H10MO.B	DDVAGATAAGAWAR	1
489	SOX1_HUMAN.H10MO.D	DATSAATGTTATTSAT	1
490	FOXJ2_HUMAN.H10MO.C	TGTTTRTTTW	1
491	IRF5_HUMAN.H10MO.D	KAAAGGRAARCMAAAWSWGA	1
492	HXD8_HUMAN.H10MO.D	WAATWTGCAYN	1
493	ONEC3_HUMAN.H10MO.D	TATYGATTTTTT	1
494	LHX8_HUMAN.H10MO.D	YRYTRATTRCMATTAATT	1
495	NFAC1_HUMAN.H10MO.A	MMATGGAAAWTT	1
496	MEF2D_HUMAN.H10MO.C	GCTATTTWTAGV	1
497	FOXM1_HUMAN.H10MO.D	BTTGWKTGWTTWY	1
498	ZN333_HUMAN.H10MO.D	SKATAATGA	1
499	SOX2_HUMAN.H10MO.B	CCWTTGTYATGCAAAW	1
500	GATA6_HUMAN.H10MO.S	NWGATAA	1
501	TF2LX_HUMAN.H10MO.D	GACAGCTGTCATWRY	1
502	LHX6_HUMAN.H10MO.D	VYTAATTAGYRYTAATTA	1
503	FOXJ3_HUMAN.H10MO.S	TKKTTWWTGTTTA	1
504	LHX2_HUMAN.H10MO.D	YRSDTTYAATWAG	1
505	NR1D1_HUMAN.H10MO.C	AWAARTAGGTCARW	1
506	DBP_HUMAN.H10MO.B	VTTATGYAABM	1
507	FOXD1_HUMAN.H10MO.D	CWWTGTTTACHTWVR	1
508	NANOG_HUMAN.H10MO.A	YYWTTGWNATGCAAATK	1
509	TEF_HUMAN.H10MO.D	TGTTTATGTAAMTK	1
510	ZN384_HUMAN.H10MO.C	GSAAAAAVYMKS	1
511	FOXA1_HUMAN.H10MO.A	WTRTTTACWYWDB	1
512	MSX2_HUMAN.H10MO.D	TAATTDK	1
513	HXB13_HUMAN.H10MO.D	DDTTTTAYKRG	1
514	FOXG1_HUMAN.H10MO.D	DTTGTTTAYDTWTDTTT	1
515	MIXL1_HUMAN.H10MO.D	GBTAATTARAT	1
516	HMGA2_HUMAN.H10MO.D	AATWWYSSSSAATAT	1
517	SOX9_HUMAN.H10MO.B	YCCATTGTTYT	1
518	SRY_HUMAN.H10MO.B	YWTTGTTTH	1
519	HXC13_HUMAN.H10MO.D	DDTTTTACKAG	1
520	HXA5_HUMAN.H10MO.D	YTRATTAATG	1
521	VSX1_HUMAN.H10MO.D	TAATTAGCHWWWWW	1
522	PBX2_HUMAN.H10MO.C	KRAWKTGATTGATKS	1
523	ONEC2_HUMAN.H10MO.D	DKSWTKWTATKGATTTTTYYT	1
524	NFIL3_HUMAN.H10MO.C	RTTAYGTAAYKYMB	1
525	IRX3_HUMAN.H10MO.D	WNWCATGTWMT	1
526	FOXQ1_HUMAN.H10MO.C	HATTGTTTATTT	1
527	HXD4_HUMAN.H10MO.D	TTAATTGW	1
528	HXC11_HUMAN.H10MO.D	DTTTWAYGACY	1
529	PO2F1_HUMAN.H10MO.B	HATGCAAAT	1
530	SOX11_HUMAN.H10MO.D	AACAMTGMMATTGTTB	1
531	MNX1_HUMAN.H10MO.D	MBATTTDHWTHWCYHYTHH	1
532	IRF9_HUMAN.H10MO.C	GAAAGCGAAAYT	1
533	NKX31_HUMAN.H10MO.C	WWTAAGTATWTWW	1
534	SOX13_HUMAN.H10MO.D	YATTGTTY	1
535	ARI3A_HUMAN.H10MO.S	AATTAAA	1
536	PAX3_HUMAN.H10MO.D	GWTAATYGATTAW	1
537	EMX1_HUMAN.H10MO.D	TAATTAGYTAAW	1
538	PAX4_HUMAN.H10MO.D	TWAYTAATTMRH	1
539	ZFHX3_HUMAN.H10MO.D	ATTAWTAATTA	1
540	CUX2_HUMAN.H10MO.D	DATCRATWHDDTTATCGATYA	1
541	MSX1_HUMAN.H10MO.D	TAATTGSWWKTTAATTGS	1
542	HXB7_HUMAN.H10MO.C	TTGATTRATK	1
543	TBP_HUMAN.H10MO.C	RRTATAWAWDS	1
544	RAX2_HUMAN.H10MO.D	YTAATTARATWA	1
545	HXB8_HUMAN.H10MO.C	TTGATTAATKV	1
546	FOXJ3_HUMAN.H10MO.A	TTGTTTATKKTTW	1
547	CDX1_HUMAN.H10MO.C	HTTTATGD	1
548	HXA13_HUMAN.H10MO.C	GDTTTTATTGG	1
549	CDC5L_HUMAN.H10MO.D	GBGWKTTAAYRTAWY	1
550	FOXO1_HUMAN.H10MO.C	DDBTTGTTTWBWWTTT	1
551	PO4F1_HUMAN.H10MO.D	CATTAATTATTCAT	1
552	MEF2C_HUMAN.H10MO.C	DKCTATTTTTRGM	1
553	GSX1_HUMAN.H10MO.D	TAATTAGNDDTTAAT	1
554	HNF1A_HUMAN.H10MO.A	RGTTAATMWTTAMCM	1
555	GATA5_HUMAN.H10MO.D	WVANWGATAAYTYRRHK	1
556	PO6F1_HUMAN.H10MO.D	CATAAWTTATGCR	1
557	PO4F3_HUMAN.H10MO.D	TCATTAATTATKCAT	1
558	FUBP1_HUMAN.H10MO.D	TYGTNTTTTTTT	1
559	EVI1_HUMAN.H10MO.B	WAGAYAAGATAANAKA	1
560	ARX_HUMAN.H10MO.D	YTAATYTAATTAR	1
561	CDX2_HUMAN.H10MO.C	WTTTATRD	1
562	MEF2B_HUMAN.H10MO.D	TGTTRCTATWWATAGC	1
563	MEOX1_HUMAN.H10MO.D	GGTAATTAGBGKHAWW	1
564	PROP1_HUMAN.H10MO.D	RASHAATTAAHATVR	1
565	HXB3_HUMAN.H10MO.D	YTAATTASYTTTTW	1
566	FOXP3_HUMAN.H10MO.D	AATKTGWTT	1
567	UNC4_HUMAN.H10MO.D	TAATTTAATTA	1
568	HMGA1_HUMAN.H10MO.D	NWATTTT	1
569	LHX3_HUMAN.H10MO.C	AAAATTAATTARY	1
570	PHX2B_HUMAN.H10MO.D	TAATYTAATTA	1
571	CPEB1_HUMAN.H10MO.D	TTTTTATTYTTTTTTTT	1
572	FOXD3_HUMAN.H10MO.D	TGTTTGTTT	1
573	ALX3_HUMAN.H10MO.D	TAATYTAATTA	1
574	FOXL1_HUMAN.H10MO.D	TKTTTGTTTRTTTAYWTTT	1
575	FOXO4_HUMAN.H10MO.C	TTGTTTAYK	1
576	FOXF2_HUMAN.H10MO.D	TGTTTACHTWD	1
577	BARH1_HUMAN.H10MO.D	TAAWYGBYBHTAA	1
578	EVX2_HUMAN.H10MO.A	TTTTATKRCHYH	1
579	HMX2_HUMAN.H10MO.D	DTTAAKTGNTT	1
580	PHX2A_HUMAN.H10MO.D	TAATYTAATTA	1
581	HNF1B_HUMAN.H10MO.B	RGTTAATRWTTAAC	1
582	PAX7_HUMAN.H10MO.D	TAATYGATTAW	1
583	GSX2_HUMAN.H10MO.D	YTAATTRSHWWTTAAT	1
584	PO2F3_HUMAN.H10MO.D	DTYATGCWWAWTTR	1
585	SOX21_HUMAN.H10MO.D	RAACAATGKYAKTGTT	1
586	ALX4_HUMAN.H10MO.D	TAATYTAATTAR	1
587	FOXA3_HUMAN.H10MO.C	HTRTTTRYTTWBY	1
588	ISX_HUMAN.H10MO.D	YTAATTRGHTWWWWWW	1
589	NKX61_HUMAN.H10MO.D	WWTTAATKASBTTTWAWTD	1
590	ARI3A_HUMAN.H10MO.D	RATTAAWBRRWATCAAAWTWWA	1
591	DLX4_HUMAN.H10MO.D	TAATTASNBHWWWWWD	1
592	PO3F1_HUMAN.H10MO.C	VATKSWWATGCAAW	1
593	LMX1A_HUMAN.H10MO.D	TAATTAATTWKKTWATTWW	1
594	ESX1_HUMAN.H10MO.D	RYTAATTRGYNHWWWTW	1
595	FOXO3_HUMAN.H10MO.B	KRYTTGTTTWCMK	1
596	P5F1B_HUMAN.H10MO.D	DMATTTGCATATTYAW	1
597	HXC6_HUMAN.H10MO.D	ATGATTTATTACTTT	1
598	HME1_HUMAN.H10MO.D	VCTAATTRSYHAWWWWW	1
599	DRGX_HUMAN.H10MO.D	TAATYTAATTA	1
600	HXD12_HUMAN.H10MO.D	DDTTTTAHKRN	1
601	BSH_HUMAN.H10MO.D	YVATTAACBMATTA	1
602	FOXB1_HUMAN.H10MO.D	RTMAATRTTTACATAAB	1
603	SHOX_HUMAN.H10MO.D	YTAATTRRYTWWWWWWD	1
604	ALX1_HUMAN.H10MO.B	RTAATTRVATTA	1
605	BARH2_HUMAN.H10MO.D	VYTAAWYGNTSHWWWWHR	1
606	DMBX1_HUMAN.H10MO.D	YMMTWWWAAYCYAATTAABD	1
607	HXD11_HUMAN.H10MO.D	DWTTTATKRHN	1
608	MEF2A_HUMAN.H10MO.A	DKCTATTTTTRGM	1
609	PO3F3_HUMAN.H10MO.D	WWWAWTTATGCWWATTW	1
610	PO5F1_HUMAN.H10MO.A	CYWTTSWTATGCAAAT	1
611	VAX1_HUMAN.H10MO.D	RSTAATTAGBSTWAWTWW	1
612	BARX1_HUMAN.H10MO.D	TAATYGNTWTTTAATKG	1
613	DLX1_HUMAN.H10MO.D	WWWWWTATGSTAATTA	1
614	DLX5_HUMAN.H10MO.D	AATTWDNBDTAATT	1
615	DLX6_HUMAN.H10MO.D	TAATTANNNHWWWWW	1
616	DUXA_HUMAN.H10MO.D	TGATTARRTYA	1
617	ETV2_HUMAN.H10MO.D	YNYKRTTTYND	1
618	EVX1_HUMAN.H10MO.D	TDHTWDTWTGTTTACTTAWM	1
619	FOXC1_HUMAN.H10MO.C	CDWTGTTTACTTWRG	1
620	FOXD2_HUMAN.H10MO.D	WAWGTAAATRTTWWYTTAA	1
621	FOXF1_HUMAN.H10MO.D	WTGTTTATTTW	1
622	GBX1_HUMAN.H10MO.D	BTAATTRRYNHWWWWWW	1
623	GBX2_HUMAN.H10MO.D	BTAATTRSYBHHWWWWW	1
624	HMX1_HUMAN.H10MO.D	DTTAATTGHTTTTTAAT	1
625	HNF6_HUMAN.H10MO.C	WWTATTGATTTWDH	1
626	HXA11_HUMAN.H10MO.D	TWAADTTTTAYGR	1
627	HXC10_HUMAN.H10MO.D	WWWWWWWNNWTTTWATKRC	1
628	HXC12_HUMAN.H10MO.D	DTTTTAYKACYT	1
629	HXD10_HUMAN.H10MO.D	TGCTTTAATT	1
630	HXD9_HUMAN.H10MO.D	ARWTTNATKD	1
631	LHX9_HUMAN.H10MO.D	YTAATTAGYNHWWWWWWD	1
632	LMX1B_HUMAN.H10MO.D	TAATTAAHWVMYTWWWWW	1
633	PIT1_HUMAN.H10MO.C	YTMATGAATATWY	1
634	PO2F2_HUMAN.H10MO.D	WMATTTGCATAWTYAW	1
635	PO3F2_HUMAN.H10MO.D	AWWATTYATG	1
636	PO3F4_HUMAN.H10MO.D	TMATTTGCATAATTWAW	1
637	SHOX2_HUMAN.H10MO.D	YTAATTRRYYHWWWWWD	1
638	SOX5_HUMAN.H10MO.C	YATTGTTW	1
639	SOX7_HUMAN.H10MO.D	AACAMTGMAATTGTTY	1
640	SOX8_HUMAN.H10MO.D	WSACTGMAATTGATKY	1
641	KLF6_HUMAN.H10MO.D	GGGGGCKG	1

## Sheet: group 3
Rank order	Motif	Sequence	p-value
1	PLAL1_HUMAN.H10MO.D	CRGGGGGCCC	4.397e-07
2	ERR1_HUMAN.H10MO.D	GSCCAAGGTCASVS	4.948e-05
3	CTCFL_HUMAN.H10MO.A	YBRCCASYAGRKGGCRSYV	6.293e-05
4	GLIS1_HUMAN.H10MO.D	TCGTGGGGGGTMD	8.086e-05
5	ZN740_HUMAN.H10MO.D	DKKGGGGGGGHRDK	0.0003931
6	AP2B_HUMAN.H10MO.B	GCCYGVGGGS	0.0006424
7	AP2C_HUMAN.H10MO.A	VTGSCCTGRGGSHR	0.0007275
8	KLF1_HUMAN.H10MO.C	CAGGGTGKGGC	0.0008591
9	INSM1_HUMAN.H10MO.C	TGTMAGGGGGCR	0.0008845
10	ZBT7A_HUMAN.H10MO.D	MKCWSKGGGTNBMCBAG	0.001014
11	ZIC2_HUMAN.H10MO.C	KGGGTGGTC	0.001331
12	ZN350_HUMAN.H10MO.C	ASGGGVVGCARDNVTTTGKKGCCC	0.002102
13	GLIS3_HUMAN.H10MO.D	GYGGGGGGTM	0.002176
14	AP2A_HUMAN.H10MO.C	ATKSCCTGRGGSHAD	0.00328
15	KLF13_HUMAN.H10MO.D	DRGKGGGCGKD	0.004204
16	ZIC4_HUMAN.H10MO.D	DCRCAGCGGGGGGTC	0.0113
17	ZIC1_HUMAN.H10MO.B	KGGGWGGTS	0.02776
18	CTCF_HUMAN.H10MO.A	YKRCCASYAGRKGGCRSYVB	0.03141
19	PAX5_HUMAN.H10MO.A	SSVDRVKCAGCSRAGCGTGAC	0.03426
20	EGR2_HUMAN.H10MO.C	DGMGTGGGCGG	0.04288
21	GLI2_HUMAN.H10MO.B	GTGGGTGGTCY	0.04745
22	EGR4_HUMAN.H10MO.D	GGSGGYRGGGM	0.04973
23	PLAG1_HUMAN.H10MO.S	ARDGGGGGSHBYM	0.05457
24	KLF3_HUMAN.H10MO.D	HRCYWGGGTGKGGCT	0.05784
25	GLI1_HUMAN.H10MO.C	BTGGGTGGTCY	0.06227
26	KLF14_HUMAN.H10MO.D	DRGKGGGCGTGGY	0.0884
27	KLF8_HUMAN.H10MO.C	CAGGGKGTG	0.09033
28	GLIS2_HUMAN.H10MO.D	CKTCGCGGGGGGTM	0.09201
29	KLF16_HUMAN.H10MO.D	GGGGGYGKGKBGGGGGGGG	0.09507
30	ZBT7B_HUMAN.H10MO.D	SSCSGTTGCCATGGVRACSGS	0.09991
31	ZKSC1_HUMAN.H10MO.C	CCYGGCACAYAGTAGGTSCTCA	0.1066
32	ETV1_HUMAN.H10MO.B	SSVGRCMGGAAGYRVVSSBSSS	0.1529
33	REST_HUMAN.H10MO.A	TTCAGCACCAYGGACAGCKCCM	0.1587
34	KAISO_HUMAN.H10MO.A	GYTCTCGCGAGRBYBVGGS	0.2118
35	HES7_HUMAN.H10MO.D	TGGCACGTGCCG	0.2139
36	PLAG1_HUMAN.H10MO.D	GGRGGSMHNWVKAGGGG	0.2315
37	AP2D_HUMAN.H10MO.D	CGCCYGVGGCSCGT	0.2327
38	BHE41_HUMAN.H10MO.D	WSVRKSYCACGTGMWGRRRV	0.2347
39	KLF15_HUMAN.H10MO.D	RSMKGGGAGDKGGGGSS	0.2351
40	COT2_HUMAN.H10MO.S	VAGGTCAARGGTCAM	0.2477
41	RREB1_HUMAN.H10MO.D	DKGKKKGKGGKTGKTTTGGGKT	0.27
42	HEN1_HUMAN.H10MO.C	BGGGKMKCAGCTGCGKCCYY	0.281
43	CLOCK_HUMAN.H10MO.D	GGDBKGGDGRSRCGKGTRGK	0.2914
44	SRBP2_HUMAN.H10MO.B	VSGTGGGGWGABG	0.2983
45	NR1H4_HUMAN.H10MO.C	RRGGTCADTGACCT	0.3155
46	KLF6_HUMAN.H10MO.D	GGGGGCKG	0.3248
47	ESR1_HUMAN.H10MO.S	RGGTCASVSTGACCTGRS	0.3428
48	MYC_HUMAN.H10MO.A	GASCACGTGGY	0.3597
49	E2F6_HUMAN.H10MO.C	NKGGCGGGARRG	0.3697
50	TF7L1_HUMAN.H10MO.D	WDRDDMWWCGGGGMGV	0.412
51	MBD2_HUMAN.H10MO.B	SSGKCCGGMGR	0.437
52	E2F8_HUMAN.H10MO.D	TTTRGMGGGAAW	0.4389
53	FOXK1_HUMAN.H10MO.D	KRTTGKGTSSGT	0.4737
54	ZN219_HUMAN.H10MO.D	GDGGGGGGYGGA	0.4766
55	MZF1_HUMAN.H10MO.D	RGDGGGGAW	0.4946
56	HEY2_HUMAN.H10MO.D	GKBGGCWCGTGGCHTBV	0.5235
57	NR5A2_HUMAN.H10MO.C	YYCAAGGYYA	0.5827
58	THAP1_HUMAN.H10MO.D	SGCCGCCATSTYGGSYBCGGGC	0.6078
59	ARNT2_HUMAN.H10MO.D	GNCGTGGSASRC	0.6166
60	COE1_HUMAN.H10MO.A	DRKYCCCWGGGGAVH	0.6357
61	ZEP2_HUMAN.H10MO.D	GGYDGGGWAACCSS	0.6366
62	NR0B1_HUMAN.H10MO.D	GMGKGGGASR	0.6451
63	BMAL1_HUMAN.H10MO.C	KGRACACGTGACYC	0.688
64	TFCP2_HUMAN.H10MO.D	SCCTGMNCDSRCCRGA	0.6941
65	PPARA_HUMAN.H10MO.C	RGGTCARAGGTCA	0.6993
66	E2F4_HUMAN.H10MO.A	NDDKGGCGSGAAAN	0.7021
67	PKNX2_HUMAN.H10MO.D	DKGRCRGGTGKSA	0.7081
68	ZN423_HUMAN.H10MO.D	GRCACCCWAGGGTGC	0.7468
69	WT1_HUMAN.H10MO.D	GMGGGGGCGKGGG	0.7843
70	TWST1_HUMAN.H10MO.D	MCCCAGGTGK	0.7923
71	VDR_HUMAN.H10MO.B	RRGGTCASNGRGKTCA	0.8056
72	NRF1_HUMAN.H10MO.A	SYGCGCMTGCGCRSBGSS	0.8692
73	SPIC_HUMAN.H10MO.D	KVDRRWGGGKDRG	0.8719
74	ZN148_HUMAN.H10MO.D	KGRGKGGGGGAGGGG	0.9275
75	ELK3_HUMAN.H10MO.D	VMCHGGAARTSC	0.928
76	EGR1_HUMAN.H10MO.S	BGCGKGGGCGG	0.9304
77	MYOD1_HUMAN.H10MO.C	SCASCTGTY	0.9324
78	NDF1_HUMAN.H10MO.C	CGGCAGRTGKSC	0.934
79	ESR2_HUMAN.H10MO.A	VRGGTCASKSTGACCTKR	0.9439
80	MECP2_HUMAN.H10MO.C	SCCGGRR	0.9474
81	ZN639_HUMAN.H10MO.D	SRVKGCGCATGCGCAGVRVS	0.9544
82	E2F1_HUMAN.H10MO.A	DDNDGGCGSGAAAV	0.9733
83	SMAD3_HUMAN.H10MO.C	STGTCTGKCY	0.9736
84	SRBP1_HUMAN.H10MO.B	GGTGGGGTGAB	0.9778
85	GSC2_HUMAN.H10MO.D	RKMGGRTTRGB	0.9782
86	IRX2_HUMAN.H10MO.D	RCDKGKBDKGDCRKGTDVK	0.9784
87	NFKB1_HUMAN.H10MO.B	GGGRAAKYCCC	0.983
88	P73_HUMAN.H10MO.S	GGGRCADGYYYB	0.9834
89	HTF4_HUMAN.H10MO.B	VNSCAGGTGBG	0.9882
90	PPARG_HUMAN.H10MO.A	AWBTRGGKCAAAGGKCA	0.9884
91	SMAD1_HUMAN.H10MO.D	RSCCTGTCTGCC	0.9901
92	USF2_HUMAN.H10MO.A	GGGTCACGTGRBSVSSSSB	0.9929
93	ZN524_HUMAN.H10MO.D	GGGTDCRAGGGTTCGAGK	0.9949
94	MLXPL_HUMAN.H10MO.D	GCAYGKGVCAMCSBCGTGB	0.9964
95	STF1_HUMAN.H10MO.B	YCAAGGYCA	0.9975
96	ZN784_HUMAN.H10MO.D	DMGGTAGGTRV	0.9987
97	MYOG_HUMAN.H10MO.D	TRACAGCTGCWGC	0.9988
98	EPAS1_HUMAN.H10MO.D	GTGHRTRCGTGKG	0.9989
99	ZBTB4_HUMAN.H10MO.D	CCTAGATGGCAGGTGGG	0.999
100	MYF6_HUMAN.H10MO.C	GCAGSTG	0.9991
101	SPZ1_HUMAN.H10MO.D	CGGCKGWWACMBYGGG	0.9993
102	NFIC_HUMAN.H10MO.A	HYYTGGCWSNVDKCCMR	0.9997
103	PEBB_HUMAN.H10MO.C	TYTGTGGTYWB	0.9997
104	P63_HUMAN.H10MO.S	GRRCWTGTCYS	0.9997
105	KLF4_HUMAN.H10MO.A	DGGGYGKGGC	0.9998
106	NR2C2_HUMAN.H10MO.A	RGGTCARAGGTCA	0.9998
107	MESP1_HUMAN.H10MO.D	VCAGGTGKKBD	0.9999
108	HES5_HUMAN.H10MO.D	YGGCACGTGYCR	0.9999
109	REL_HUMAN.H10MO.C	DKGGRNWTTCCM	0.9999
110	KLF12_HUMAN.H10MO.D	DDGGGCGTGGYH	1
111	THB_HUMAN.H10MO.S	SGTSAGGTCA	1
112	SP2_HUMAN.H10MO.C	GGSSVGGGGGCGGGGCCDGSGS	1
113	ZIC3_HUMAN.H10MO.C	BGGGTGGYC	1
114	SP3_HUMAN.H10MO.B	SGVVGGGGGCGGGGCBRGSS	1
115	ITF2_HUMAN.H10MO.B	VCAGGTGCD	1
116	ZFX_HUMAN.H10MO.C	SVGSSSSSCAGGCCBVGSC	1
117	HESX1_HUMAN.H10MO.D	ABSYGGCWMRTRRMMT	1
118	TGIF1_HUMAN.H10MO.D	TGTSAGGTGTCASCTK	1
119	ETS2_HUMAN.H10MO.C	VMVGGAAGTKS	1
120	NR1I3_HUMAN.H10MO.C	RRGGTCARVRRAGTTCAD	1
121	MAZ_HUMAN.H10MO.A	GGGMGGGGSSGGGGGGGGGGGG	1
122	HEY1_HUMAN.H10MO.D	KGRCACGTGBCK	1
123	NR6A1_HUMAN.H10MO.B	AAGKTCAAGKTCA	1
124	RFX2_HUMAN.H10MO.C	SSSSCSGTTGCCATGGMRACSG	1
125	ZBTB6_HUMAN.H10MO.D	VGRTGATRGAGCC	1
126	ZBTB4_HUMAN.H10MO.S	CAATRGCGDTKGYGR	1
127	MYCN_HUMAN.H10MO.B	CCACGTGS	1
128	MAX_HUMAN.H10MO.A	RGYCACGTGST	1
129	MNT_HUMAN.H10MO.D	RKRRRDKVAGGKGDDR	1
130	PPARG_HUMAN.H10MO.S	MAWAGGTCA	1
131	GLI3_HUMAN.H10MO.B	BTGGGTGGTCY	1
132	ZN143_HUMAN.H10MO.A	GCRWKGCATKMTGGGARDTVBH	1
133	HNF4A_HUMAN.H10MO.A	RRGKBCAAAGTYCA	1
134	SP4_HUMAN.H10MO.D	GGGGGCGGGGCCKGGGSSGGGS	1
135	KAISO_HUMAN.H10MO.S	YTSGCRGGARKH	1
136	PTF1A_HUMAN.H10MO.C	CRGGRAAHWSMACASSTGYSC	1
137	RELB_HUMAN.H10MO.C	RGGGRMTTTCCM	1
138	ATF6A_HUMAN.H10MO.B	GKGSTGACGTGG	1
139	PPARD_HUMAN.H10MO.D	YAGGNBAAAGGTCA	1
140	ELF2_HUMAN.H10MO.C	VRRVSCGGAAGYRSVRS	1
141	TFDP1_HUMAN.H10MO.D	SSSVSSGSGSVRGGGGCGGGRV	1
142	TFAP4_HUMAN.H10MO.C	RYCAGCTGYGG	1
143	TBX15_HUMAN.H10MO.D	GGGGGGGGGGGGGTGGGDR	1
144	EGR1_HUMAN.H10MO.A	GGGRDGYGKGGGHGGGRG	1
145	TBX1_HUMAN.H10MO.D	GGGYGGGYAGGGGTGGGMDD	1
146	ZEP1_HUMAN.H10MO.D	TGGGAAATCCCB	1
147	NR2C1_HUMAN.H10MO.C	GSYVAGAGGTCAB	1
148	RARG_HUMAN.H10MO.C	GGRGKTCRVCNRVAGGTCAV	1
149	SP1_HUMAN.H10MO.C	GGGRRGGGGGCGGGGCSDG	1
150	NFIA_HUMAN.H10MO.C	TTGGCHNRNWGCCAR	1
151	RARB_HUMAN.H10MO.D	SAGGTCAVVVV	1
152	ASCL2_HUMAN.H10MO.D	KKGRGYRGSTGGKK	1
153	PURA_HUMAN.H10MO.D	GGWRKKGGDGGGCVKGG	1
154	RARA_HUMAN.H10MO.C	RGGTCANSRRVAGGTCA	1
155	ESR2_HUMAN.H10MO.S	RGGTCAS	1
156	HES1_HUMAN.H10MO.D	VMGVCACGMGMCM	1
157	ZSCA4_HUMAN.H10MO.D	AGTGTGTGCACT	1
158	THA_HUMAN.H10MO.C	RGGTCABYTSAGGTCAK	1
159	ESR1_HUMAN.H10MO.A	MMAGGTCASVVTGHCCH	1
160	THB_HUMAN.H10MO.C	GRSSYSASVTSAGGTCA	1
161	IRF4_HUMAN.H10MO.C	RRRGRGGAASTGARAS	1
162	PAX5_HUMAN.H10MO.S	GGCTGAGS	1
163	TBX5_HUMAN.H10MO.D	AGGTGTGA	1
164	RXRA_HUMAN.H10MO.C	MWSTRGGDCAAAGGTCA	1
165	MTF1_HUMAN.H10MO.C	MGKGCCGTGTGCAAARS	1
166	PROX1_HUMAN.H10MO.D	KGGKARGGCGKSKKGGG	1
167	NKX32_HUMAN.H10MO.C	AGYTAAGTGGV	1
168	STAT3_HUMAN.H10MO.A	YTTCCYGGAAR	1
169	FIGLA_HUMAN.H10MO.D	DHMCAGGTGKT	1
170	PAX8_HUMAN.H10MO.D	BTVAYTSRMGYRKR	1
171	RFX5_HUMAN.H10MO.A	STCMBCWGTTGCYRGGVARA	1
172	CREB1_HUMAN.H10MO.A	TKACGTCAYYN	1
173	TF65_HUMAN.H10MO.A	GGGRMTTTCCM	1
174	HAND1_HUMAN.H10MO.D	GBRTCTGGMWTT	1
175	HIC2_HUMAN.H10MO.D	HCRTGCCAGVN	1
176	HIC1_HUMAN.H10MO.C	GGGKTGCCC	1
177	USF1_HUMAN.H10MO.A	GGTCACGTGR	1
178	P73_HUMAN.H10MO.A	RGRCATGYYTGGRCWTGYYB	1
179	HNF4G_HUMAN.H10MO.C	VRGKNCAAAGKYCA	1
180	MUSC_HUMAN.H10MO.D	CAGAAGACGGCATACGAB	1
181	ENOA_HUMAN.H10MO.A	SRSCAYGTGKSHR	1
182	NR4A3_HUMAN.H10MO.D	CAAAGGTCAS	1
183	RXRG_HUMAN.H10MO.B	GGTCAAAGGTCAH	1
184	E2F3_HUMAN.H10MO.B	SSCGCSAAAC	1
185	BACH1_HUMAN.H10MO.A	TGCTGAGTCABSS	1
186	E2F5_HUMAN.H10MO.B	SGCGCSAAAH	1
187	MEIS3_HUMAN.H10MO.D	DKTGACAGSTK	1
188	SNAI1_HUMAN.H10MO.C	SCAGGTGK	1
189	CENPB_HUMAN.H10MO.D	TTCGTWSBAHGCGGGWW	1
190	COT1_HUMAN.H10MO.S	GKBCAAAGGTCA	1
191	EGR3_HUMAN.H10MO.D	WGAGTGGGYGT	1
192	VDR_HUMAN.H10MO.S	GRGKTCA	1
193	RUNX2_HUMAN.H10MO.B	YTGTGGTTDGK	1
194	ZEB1_HUMAN.H10MO.B	NVCAGGTRDRN	1
195	TFE3_HUMAN.H10MO.C	RGTCAYGTGV	1
196	NFYC_HUMAN.H10MO.B	YAGCCAATSAGVGS	1
197	SP1_HUMAN.H10MO.S	GGGGGCGGGGC	1
198	P53_HUMAN.H10MO.B	RGRCATGTCTGGRCATGYCH	1
199	IKZF1_HUMAN.H10MO.C	BTGGGARR	1
200	ARNT_HUMAN.H10MO.B	BYRCGTGC	1
201	ERR2_HUMAN.H10MO.A	YCAAGGTCA	1
202	GCM2_HUMAN.H10MO.D	BATGCGGGTAB	1
203	ZN589_HUMAN.H10MO.D	CCMASGGKWWYWRCCS	1
204	SUH_HUMAN.H10MO.C	SYGTGRGAAMN	1
205	TFE2_HUMAN.H10MO.C	AMCAGATGBYC	1
206	MLX_HUMAN.H10MO.D	YGATCACGTGN	1
207	NFIA_HUMAN.H10MO.S	MTTGGCW	1
208	TBX20_HUMAN.H10MO.D	AGGTGTGAAGGTGTGAA	1
209	HIF1A_HUMAN.H10MO.A	SBSTACGTGCSB	1
210	CREM_HUMAN.H10MO.C	CRVTGACGTCA	1
211	ZN282_HUMAN.H10MO.D	MGKRTTRTGGGARA	1
212	RARA_HUMAN.H10MO.S	SAGGTCA	1
213	NFE2_HUMAN.H10MO.B	RSVATGACTCAGCA	1
214	NF2L2_HUMAN.H10MO.D	VRTGACTCAGCA	1
215	COT2_HUMAN.H10MO.A	CARAGGTCARRGD	1
216	PRDM4_HUMAN.H10MO.D	KBGGGGGGCCTTGAAA	1
217	SMRC1_HUMAN.H10MO.D	SBVTGAGTCAB	1
218	YBOX1_HUMAN.H10MO.D	BSKGATTSSCY	1
219	SNAI2_HUMAN.H10MO.C	BCAGGTG	1
220	RUNX3_HUMAN.H10MO.C	NTYTGTGGTTW	1
221	MAFB_HUMAN.H10MO.D	WGCTGACDS	1
222	ID4_HUMAN.H10MO.D	DNCAGGTGYNV	1
223	FLI1_HUMAN.H10MO.A	RCMGGAAGYGGSK	1
224	NRL_HUMAN.H10MO.D	TGCTGACKYWR	1
225	NFKB2_HUMAN.H10MO.D	GRAATBYCCCT	1
226	CR3L1_HUMAN.H10MO.D	GCCACGTGGCA	1
227	STAT1_HUMAN.H10MO.S	SDYTTCCRGGAAAYS	1
228	HXB2_HUMAN.H10MO.D	WAGAAYVTTCTAGAA	1
229	TLX1_HUMAN.H10MO.D	YYGGYAMBDDGCCAAGR	1
230	ATF7_HUMAN.H10MO.D	KRTGACGTCAT	1
231	TGIF1_HUMAN.H10MO.S	NTGACAG	1
232	MAFA_HUMAN.H10MO.D	STGCTGACBMYGCAGYHTYCV	1
233	GCR_HUMAN.H10MO.A	RGRACABKSTGTYCY	1
234	BHE40_HUMAN.H10MO.A	KCACGTGAS	1
235	ZBT18_HUMAN.H10MO.D	TCCAGATGTTBVSS	1
236	PAX2_HUMAN.H10MO.S	SMRTGAC	1
237	NKX21_HUMAN.H10MO.D	STCAAGKGCH	1
238	MAFK_HUMAN.H10MO.S	TGCTGAGTCA	1
239	TLX1_HUMAN.H10MO.S	YGBYAAKRWGS	1
240	BRCA1_HUMAN.H10MO.D	BKTSKGTTG	1
241	TFDP1_HUMAN.H10MO.S	AWWKRGCGGGAAAY	1
242	ELK1_HUMAN.H10MO.A	RCCGGAAGT	1
243	CXXC1_HUMAN.H10MO.D	CGKTGKY	1
244	JDP2_HUMAN.H10MO.D	BGATGACGTCAY	1
245	RXRB_HUMAN.H10MO.C	TSAGGTCASR	1
246	RHXF1_HUMAN.H10MO.D	NRGGGATYADS	1
247	GABP1_HUMAN.H10MO.C	CCGGAAGTGV	1
248	ZKSC3_HUMAN.H10MO.D	TYCGAGGCTAG	1
249	PPARA_HUMAN.H10MO.S	RAGGTCA	1
250	P63_HUMAN.H10MO.A	RRRCAWGYCTGGRCWTGYH	1
251	NKX28_HUMAN.H10MO.C	TTCAAGKRC	1
252	ZBED1_HUMAN.H10MO.D	YATGTCGCGAYAK	1
253	MAF_HUMAN.H10MO.B	KTGCTGAC	1
254	JUND_HUMAN.H10MO.A	RRTGAGTCAYH	1
255	GCR_HUMAN.H10MO.S	AGAACAK	1
256	TAL1_HUMAN.H10MO.S	GAACAGATGGTC	1
257	RUNX1_HUMAN.H10MO.A	BYTGTGGTTWB	1
258	NFYB_HUMAN.H10MO.A	YRRCCAATSAGMR	1
259	CREB3_HUMAN.H10MO.D	KGRTGACGTGGCA	1
260	THA_HUMAN.H10MO.S	BTSAGGTCAS	1
261	HXB1_HUMAN.H10MO.D	TGATKGATGG	1
262	ANDR_HUMAN.H10MO.A	DGBACABHCTGTTCYHK	1
263	GCM1_HUMAN.H10MO.D	HWVATGCKGGYMBK	1
264	TGIF2_HUMAN.H10MO.D	DTGACAGCTGT	1
265	MYBB_HUMAN.H10MO.D	TRSMGGTTRW	1
266	HSF2_HUMAN.H10MO.A	VGAABRTTCTAGAA	1
267	CR3L2_HUMAN.H10MO.D	TGATGACGTGGCA	1
268	NR2F6_HUMAN.H10MO.D	RGGWCAAAGKTCANNKRR	1
269	TEAD4_HUMAN.H10MO.A	RCATTCCWGVSMT	1
270	ELK4_HUMAN.H10MO.A	ACCGGAAGTRN	1
271	PDX1_HUMAN.H10MO.C	RGTAATTAG	1
272	TBR1_HUMAN.H10MO.D	RAAGGTGTGAAAW	1
273	GABPA_HUMAN.H10MO.A	SVRCCGGAAGTGV	1
274	HLTF_HUMAN.H10MO.D	KANKGCTGSMAM	1
275	ETV7_HUMAN.H10MO.D	KCMHCAGGAAGTRACDY	1
276	PAX6_HUMAN.H10MO.D	TSAWGCGTRAA	1
277	PAX2_HUMAN.H10MO.D	RHTCAGTSAYGMGTGAYW	1
278	EOMES_HUMAN.H10MO.D	RRGAGGTGWKAA	1
279	CREB5_HUMAN.H10MO.D	RRTGACGTMAT	1
280	STAT4_HUMAN.H10MO.D	YTTCYYRGAAR	1
281	GMEB2_HUMAN.H10MO.D	NBKTACGTVRN	1
282	ZSC16_HUMAN.H10MO.D	RRGGTGYTCTGTTAACAMTW	1
283	NR4A2_HUMAN.H10MO.C	AAAGGTCAS	1
284	MEIS2_HUMAN.H10MO.B	TTGACAGBTGTCM	1
285	TYY1_HUMAN.H10MO.A	CAARATGGCGGC	1
286	HSF4_HUMAN.H10MO.D	TRGAABVTTCTAGAA	1
287	PRGR_HUMAN.H10MO.C	RGAACANYCTGTH	1
288	TBX21_HUMAN.H10MO.D	RAGGTGTGAAWT	1
289	FOS_HUMAN.H10MO.A	RTGAGTCAYYN	1
290	PBX3_HUMAN.H10MO.B	YBYTGATTGRYTGR	1
291	BC11A_HUMAN.H10MO.C	RAAAGAGGAAGTGARAV	1
292	ELF1_HUMAN.H10MO.A	GAACCMGGAAGTGS	1
293	SCRT1_HUMAN.H10MO.D	KCAACAGGTGGTH	1
294	MCR_HUMAN.H10MO.D	HAGDMCWGGTTGWDGTR	1
295	NR1I2_HUMAN.H10MO.C	DDRGGTYAANNRAGTTCAB	1
296	E2F7_HUMAN.H10MO.D	WWDGGCGCGAAAM	1
297	BATF3_HUMAN.H10MO.D	HHTYRYTTACGK	1
298	ETV5_HUMAN.H10MO.D	GHCAGGAAGWAAY	1
299	NKX23_HUMAN.H10MO.D	BTYAAGTGGKW	1
300	NR1H2_HUMAN.H10MO.D	TAAAGGTCAAAGGTCAACK	1
301	NR4A1_HUMAN.H10MO.C	VAAGGTCAS	1
302	E2F2_HUMAN.H10MO.B	GGCGCGAAAC	1
303	ETV4_HUMAN.H10MO.B	SAGGAAGT	1
304	SPI1_HUMAN.H10MO.A	RRAAAGAGGAAGTGARA	1
305	STAT1_HUMAN.H10MO.A	YCMTTTCCHGGAAAWCHCATKM	1
306	TFEB_HUMAN.H10MO.C	RGTCACGTG	1
307	AHR_HUMAN.H10MO.B	DTYGCGTGM	1
308	HINFP_HUMAN.H10MO.C	DMSHHMGCGGACGTTV	1
309	ELF3_HUMAN.H10MO.D	GGSAAACAGGAARY	1
310	ATF1_HUMAN.H10MO.B	NRTGACGTMAK	1
311	LBX2_HUMAN.H10MO.D	RYTAATTRGBY	1
312	PAX1_HUMAN.H10MO.D	YSGTCACGCWTGANTGV	1
313	MITF_HUMAN.H10MO.C	RWCATGTGMB	1
314	RORG_HUMAN.H10MO.C	DWAWGTRGGTCAG	1
315	RFX4_HUMAN.H10MO.D	SGTTGCCATGGYWAC	1
316	SMAD2_HUMAN.H10MO.C	TGTCTGDCACCT	1
317	BHE23_HUMAN.H10MO.D	RRSRTRTGKTDB	1
318	E4F1_HUMAN.H10MO.D	YGTKACGTC	1
319	FOXH1_HUMAN.H10MO.A	TGTGGATTSNR	1
320	SOX4_HUMAN.H10MO.C	CSCTTTGTTCTC	1
321	HME2_HUMAN.H10MO.D	NNTRRTTARNB	1
322	ATF2_HUMAN.H10MO.B	VTGACGTMA	1
323	JUN_HUMAN.H10MO.A	VTGAGTCAB	1
324	NFYA_HUMAN.H10MO.A	YRRCCAATSAGMR	1
325	SMAD4_HUMAN.H10MO.C	STGTCTSDCACCT	1
326	GATA1_HUMAN.H10MO.A	CTGBNNVVBRSAGATAAGR	1
327	GRHL1_HUMAN.H10MO.D	AACCGGTTTDDC	1
328	ERG_HUMAN.H10MO.B	RRACCGGAARTSV	1
329	CEBPZ_HUMAN.H10MO.D	DCTSATTGGCT	1
330	FOSL1_HUMAN.H10MO.A	DRTGACTCATN	1
331	PRDM1_HUMAN.H10MO.C	RAAAGTGAAAGTGA	1
332	IRF8_HUMAN.H10MO.D	GRGRAAVTGAAASYR	1
333	ATF3_HUMAN.H10MO.A	RTGACKYMA	1
334	HXA2_HUMAN.H10MO.D	NGTAATTARBD	1
335	PO6F2_HUMAN.H10MO.D	KWTAATKAGST	1
336	HSFY1_HUMAN.H10MO.D	WWTCGAACGWWW	1
337	NFAC3_HUMAN.H10MO.B	TGGAAAAHY	1
338	CUX1_HUMAN.H10MO.C	RBRSBDATCGATSK	1
339	NR1D1_HUMAN.H10MO.C	AWAARTAGGTCARW	1
340	TAL1_HUMAN.H10MO.A	CTGKNNNNNDSWGATAAGV	1
341	PKNX1_HUMAN.H10MO.D	VRVTTGAYTGATK	1
342	RARG_HUMAN.H10MO.S	RAGGTCA	1
343	VSX2_HUMAN.H10MO.D	TAATTAGCTHW	1
344	TBX3_HUMAN.H10MO.D	AGKWAGRSAMTTAGGTSWKAARAA	1
345	GFI1_HUMAN.H10MO.C	GCWSTGATTT	1
346	SRF_HUMAN.H10MO.A	MTTBKCCTTMTWTGGCCW	1
347	HLF_HUMAN.H10MO.C	GRTTRYGTAAYMS	1
348	TBX4_HUMAN.H10MO.D	RAGGTGTGAWAWNTVACACC	1
349	COT1_HUMAN.H10MO.B	CAAAGGTCA	1
350	FOSL2_HUMAN.H10MO.A	RTGACTCABHN	1
351	SOX17_HUMAN.H10MO.D	CAAMAATNHHCATTGTCS	1
352	NR1I2_HUMAN.H10MO.S	RAGTTCAB	1
353	TYY2_HUMAN.H10MO.D	AWAATGGCGGH	1
354	MGAP_HUMAN.H10MO.D	AGGTGTGAAWTTTCAC	1
355	RORA_HUMAN.H10MO.B	WWAWBTAGGTCA	1
356	RFX3_HUMAN.H10MO.B	BGTTRCCATGGYRA	1
357	EHF_HUMAN.H10MO.S	MWACCMGGAARTA	1
358	XBP1_HUMAN.H10MO.C	GACGTGKCMTWW	1
359	RFX1_HUMAN.H10MO.C	GTTGCYAGGSAA	1
360	GATA1_HUMAN.H10MO.S	DSAGATAAGR	1
361	ETS1_HUMAN.H10MO.C	ACMGGAAGT	1
362	MYBA_HUMAN.H10MO.D	HRACCGTTAAM	1
363	IRF3_HUMAN.H10MO.C	GGAAAGBGAAASBRRRA	1
364	HXA1_HUMAN.H10MO.C	TKGATGGATG	1
365	PRGR_HUMAN.H10MO.S	AGAACAB	1
366	JUNB_HUMAN.H10MO.C	GBVTGAGTCAY	1
367	ERF_HUMAN.H10MO.D	WASAKKWSKTWSGRBAYTTC	1
368	DPRX_HUMAN.H10MO.D	VSGGATTADCB	1
369	PITX2_HUMAN.H10MO.D	TKGGATTAVH	1
370	HXA7_HUMAN.H10MO.D	VMTCRATMGATTGGM	1
371	DDIT3_HUMAN.H10MO.C	GGGGATTGCAYBB	1
372	GATA2_HUMAN.H10MO.A	RSAGATAAGVV	1
373	TBX2_HUMAN.H10MO.D	TGVMWWCABAGGTGTGARRHGYSMC	1
374	SOX10_HUMAN.H10MO.D	BCWTTGT	1
375	ETV6_HUMAN.H10MO.D	WVCCGGAAGTR	1
376	TEAD1_HUMAN.H10MO.D	YACATTCCWSMKSH	1
377	BATF_HUMAN.H10MO.S	MTGAGTCAKW	1
378	MIXL1_HUMAN.H10MO.D	GBTAATTARAT	1
379	CEBPG_HUMAN.H10MO.C	ATTDTGCAATCTB	1
380	ZBT49_HUMAN.H10MO.D	NBSNTAATTRV	1
381	SCRT2_HUMAN.H10MO.D	RWGCAACAGGTGK	1
382	NOBOX_HUMAN.H10MO.C	HTAATTRSY	1
383	TCF7_HUMAN.H10MO.C	ASWWCAAAGSRB	1
384	ATOH1_HUMAN.H10MO.D	YRMCATATGYY	1
385	MYB_HUMAN.H10MO.C	CAGTTRD	1
386	HSF1_HUMAN.H10MO.A	RGAANVTTCYAGAA	1
387	EHF_HUMAN.H10MO.C	RRAVVAGGAARTRRRRR	1
388	ERR3_HUMAN.H10MO.B	TCAAGGTCA	1
389	STA5A_HUMAN.H10MO.B	YTTCYKRGAAW	1
390	NFAC1_HUMAN.H10MO.S	HGGAAAWTTCCAT	1
391	ARI5B_HUMAN.H10MO.C	DBYKDGTATTSKR	1
392	GATA3_HUMAN.H10MO.C	WVAGATAAVAW	1
393	LHX8_HUMAN.H10MO.D	YRYTRATTRCMATTAATT	1
394	GSC_HUMAN.H10MO.D	ADSGGATTARB	1
395	ELF5_HUMAN.H10MO.D	AHMAGGAWRTW	1
396	GFI1B_HUMAN.H10MO.C	WGCAGTGATTT	1
397	SOX18_HUMAN.H10MO.D	SHWHVMWTTGTTBTYKTCC	1
398	HXD3_HUMAN.H10MO.D	NGKTAATTAGK	1
399	SPIB_HUMAN.H10MO.B	ARAAASMGGAAS	1
400	NFAT5_HUMAN.H10MO.D	SYGGAAAANTYCMTK	1
401	FOSB_HUMAN.H10MO.C	GRTGACTCABH	1
402	CRX_HUMAN.H10MO.C	VRGATTAR	1
403	IRF9_HUMAN.H10MO.C	GAAAGCGAAAYT	1
404	MEIS1_HUMAN.H10MO.C	TGACAGBTTWAHG	1
405	ISL2_HUMAN.H10MO.D	YVYTAAKTGCW	1
406	FOXI1_HUMAN.H10MO.B	YTBTGATTGGYY	1
407	ETV3_HUMAN.H10MO.D	KWMRTTTGCACTTC	1
408	OTX1_HUMAN.H10MO.D	AGGATTAV	1
409	NKX25_HUMAN.H10MO.C	TYAAGTG	1
410	CEBPD_HUMAN.H10MO.B	RRTKDBGCAAT	1
411	NDF2_HUMAN.H10MO.D	DBSRTATGDTS	1
412	GATA4_HUMAN.H10MO.B	RSWGATAAV	1
413	NR1I3_HUMAN.H10MO.S	RAGKTCAB	1
414	PRRX1_HUMAN.H10MO.D	TAAYCTG	1
415	IRF7_HUMAN.H10MO.C	GAAASYGAAA	1
416	GATA6_HUMAN.H10MO.B	DDVAGATAAGAWAR	1
417	CEBPA_HUMAN.H10MO.A	DRTTGTGCAAYHW	1
418	DLX3_HUMAN.H10MO.C	GMTAATTRSW	1
419	CEBPB_HUMAN.H10MO.A	KATTGCRYAAYH	1
420	LHX4_HUMAN.H10MO.D	DNRYTAATTRN	1
421	FEV_HUMAN.H10MO.C	CAGGAARTDA	1
422	ISL1_HUMAN.H10MO.D	SYTAATR	1
423	NKX22_HUMAN.H10MO.D	KTYAAGTRSTTD	1
424	VAX2_HUMAN.H10MO.D	CACTAATTAVSYTWWH	1
425	MAFG_HUMAN.H10MO.S	MATGACT	1
426	NFAC1_HUMAN.H10MO.A	MMATGGAAAWTT	1
427	ISX_HUMAN.H10MO.D	YTAATTRGHTWWWWWW	1
428	FOXA2_HUMAN.H10MO.A	TGTTTACWYWG	1
429	NFAC4_HUMAN.H10MO.C	DGGAAAAYTW	1
430	CDX2_HUMAN.H10MO.C	WTTTATRD	1
431	RX_HUMAN.H10MO.D	TTAATTRRYWA	1
432	VSX1_HUMAN.H10MO.D	TAATTAGCHWWWWW	1
433	STA5B_HUMAN.H10MO.C	YTTCTKRGAAR	1
434	SOX15_HUMAN.H10MO.D	CWTTGTT	1
435	IRF5_HUMAN.H10MO.D	KAAAGGRAARCMAAAWSWGA	1
436	NANOG_HUMAN.H10MO.S	KTTAATGG	1
437	BCL6B_HUMAN.H10MO.D	HYGCTTTCKAG	1
438	NFAC2_HUMAN.H10MO.B	TGGAAAAWY	1
439	NGN2_HUMAN.H10MO.D	AMCATATGYYWHH	1
440	NF2L1_HUMAN.H10MO.C	NATGACD	1
441	ZN410_HUMAN.H10MO.D	TATTATGGGATGK	1
442	SOX11_HUMAN.H10MO.D	AACAMTGMMATTGTTB	1
443	DLX6_HUMAN.H10MO.D	TAATTANNNHWWWWW	1
444	HME1_HUMAN.H10MO.D	VCTAATTRSYHAWWWWW	1
445	MEOX2_HUMAN.H10MO.D	TTAATKAYBWT	1
446	NOTO_HUMAN.H10MO.D	RTTAATTAGNT	1
447	SOX21_HUMAN.H10MO.D	RAACAATGKYAKTGTT	1
448	ZN652_HUMAN.H10MO.D	AARGGGTTAAW	1
449	IRF1_HUMAN.H10MO.A	RAAASNGAAAGTGAAASTRR	1
450	GATA6_HUMAN.H10MO.S	NWGATAA	1
451	HXA9_HUMAN.H10MO.D	TGACAGTTTWAYGR	1
452	BHA15_HUMAN.H10MO.D	BDCCATATGKT	1
453	ZN333_HUMAN.H10MO.D	SKATAATGA	1
454	TF2LX_HUMAN.H10MO.D	GACAGCTGTCATWRY	1
455	MEOX1_HUMAN.H10MO.D	GGTAATTAGBGKHAWW	1
456	SPDEF_HUMAN.H10MO.D	RWCCMGGAWGWAGT	1
457	EMX2_HUMAN.H10MO.D	TAATTAGYDWAW	1
458	PRD14_HUMAN.H10MO.C	RRGTTAGRGACCYR	1
459	FOXO6_HUMAN.H10MO.D	WWSWTGTTTACRT	1
460	HMBX1_HUMAN.H10MO.D	DVCTRGTTAMN	1
461	FOXA3_HUMAN.H10MO.C	HTRTTTRYTTWBY	1
462	TBX19_HUMAN.H10MO.D	WWTTCRCACVTAGGTGTGAAWW	1
463	IRF2_HUMAN.H10MO.C	SGAAAGYGAAASYR	1
464	SOX7_HUMAN.H10MO.D	AACAMTGMAATTGTTY	1
465	BHE22_HUMAN.H10MO.D	AVCATATGTTTTT	1
466	TBP_HUMAN.H10MO.C	RRTATAWAWDS	1
467	EMX1_HUMAN.H10MO.D	TAATTAGYTAAW	1
468	HOMEZ_HUMAN.H10MO.D	WWWAATCGTTTTYTW	1
469	PO4F2_HUMAN.H10MO.D	YATTAATGAGYTK	1
470	STAT2_HUMAN.H10MO.B	TYASTTTCNBTTYCH	1
471	RAX2_HUMAN.H10MO.D	YTAATTARATWA	1
472	ALX3_HUMAN.H10MO.D	TAATYTAATTA	1
473	PRRX2_HUMAN.H10MO.C	YTAATTR	1
474	DLX4_HUMAN.H10MO.D	TAATTASNBHWWWWWD	1
475	LHX2_HUMAN.H10MO.D	YRSDTTYAATWAG	1
476	FOXO4_HUMAN.H10MO.C	TTGTTTAYK	1
477	OLIG3_HUMAN.H10MO.D	ACCATATGKTB	1
478	MAFF_HUMAN.H10MO.A	AWWWHTGCTGASTCAGCAWWWW	1
479	SOX2_HUMAN.H10MO.B	CCWTTGTYATGCAAAW	1
480	FOXC2_HUMAN.H10MO.D	GTTTGTTTWSHYAGR	1
481	PO2F1_HUMAN.H10MO.B	HATGCAAAT	1
482	HXD8_HUMAN.H10MO.D	WAATWTGCAYN	1
483	FOXF1_HUMAN.H10MO.D	WTGTTTATTTW	1
484	NFIL3_HUMAN.H10MO.C	RTTAYGTAAYKYMB	1
485	CEBPE_HUMAN.H10MO.A	TTKCGHAATMTB	1
486	GATA5_HUMAN.H10MO.D	WVANWGATAAYTYRRHK	1
487	PITX1_HUMAN.H10MO.D	DGGATTAAVGG	1
488	OLIG2_HUMAN.H10MO.D	RCCATATGKTT	1
489	FOXP2_HUMAN.H10MO.A	BTGTTTACN	1
490	HXA10_HUMAN.H10MO.C	KATRRTTTATGW	1
491	HXB6_HUMAN.H10MO.D	AWTGATTKATGMM	1
492	PAX4_HUMAN.H10MO.D	TWAYTAATTMRH	1
493	MAFG_HUMAN.H10MO.C	AAAANTGCTGASTCAGCADWW	1
494	ALX4_HUMAN.H10MO.D	TAATYTAATTAR	1
495	ESX1_HUMAN.H10MO.D	RYTAATTRGYNHWWWTW	1
496	LEF1_HUMAN.H10MO.C	CTTTGWW	1
497	HMX2_HUMAN.H10MO.D	DTTAAKTGNTT	1
498	MAFK_HUMAN.H10MO.A	RAAWNTGCTGASTCAGCAWWWW	1
499	FOXA1_HUMAN.H10MO.A	WTRTTTACWYWDB	1
500	FOXJ2_HUMAN.H10MO.C	TGTTTRTTTW	1
501	OVOL1_HUMAN.H10MO.C	KGTAACKGT	1
502	OLIG1_HUMAN.H10MO.D	AMCATATGTTTTTY	1
503	HXB13_HUMAN.H10MO.D	DDTTTTAYKRG	1
504	BPTF_HUMAN.H10MO.D	KKTBTTGTKKKS	1
505	SHOX2_HUMAN.H10MO.D	YTAATTRRYYHWWWWWD	1
506	LHX6_HUMAN.H10MO.D	VYTAATTAGYRYTAATTA	1
507	SOX3_HUMAN.H10MO.D	WSAATGBWATTSW	1
508	NR2E1_HUMAN.H10MO.D	DMTTGACTTWTTGACTT	1
509	BCL6_HUMAN.H10MO.C	DARDRCTTTCYWGGAA	1
510	BRAC_HUMAN.H10MO.D	RSAWWGTGACACCTAGGTGTGAAAT	1
511	TEF_HUMAN.H10MO.D	TGTTTATGTAAMTK	1
512	SOX1_HUMAN.H10MO.D	DATSAATGTTATTSAT	1
513	BARX2_HUMAN.H10MO.D	TYRWTAATKR	1
514	BATF_HUMAN.H10MO.A	ABTYYYRDWATGASTCAK	1
515	HMX3_HUMAN.H10MO.D	NNTTAATTGST	1
516	ZN384_HUMAN.H10MO.C	GSAAAAAVYMKS	1
517	STAT6_HUMAN.H10MO.C	TTCYYHGGAAWYY	1
518	HBP1_HUMAN.H10MO.D	AYYCATTGA	1
519	LHX3_HUMAN.H10MO.C	AAAATTAATTARY	1
520	HXA13_HUMAN.H10MO.C	GDTTTTATTGG	1
521	PO2F3_HUMAN.H10MO.D	DTYATGCWWAWTTR	1
522	SHOX_HUMAN.H10MO.D	YTAATTRRYTWWWWWWD	1
523	DBP_HUMAN.H10MO.B	VTTATGYAABM	1
524	EVI1_HUMAN.H10MO.B	WAGAYAAGATAANAKA	1
525	DLX2_HUMAN.H10MO.D	ATAATTRB	1
526	TF7L2_HUMAN.H10MO.A	KBYCTTTGAWSTB	1
527	DUXA_HUMAN.H10MO.D	TGATTARRTYA	1
528	BARH2_HUMAN.H10MO.D	VYTAAWYGNTSHWWWWHR	1
529	HXC11_HUMAN.H10MO.D	DTTTWAYGACY	1
530	CUX2_HUMAN.H10MO.D	DATCRATWHDDTTATCGATYA	1
531	BARH1_HUMAN.H10MO.D	TAAWYGBYBHTAA	1
532	PROP1_HUMAN.H10MO.D	RASHAATTAAHATVR	1
533	GBX2_HUMAN.H10MO.D	BTAATTRSYBHHWWWWW	1
534	FOXJ3_HUMAN.H10MO.A	TTGTTTATKKTTW	1
535	ONEC3_HUMAN.H10MO.D	TATYGATTTTTT	1
536	PO3F1_HUMAN.H10MO.C	VATKSWWATGCAAW	1
537	ARI3A_HUMAN.H10MO.S	AATTAAA	1
538	MEF2D_HUMAN.H10MO.C	GCTATTTWTAGV	1
539	PBX1_HUMAN.H10MO.B	WAWTTGATTGATGDB	1
540	VAX1_HUMAN.H10MO.D	RSTAATTAGBSTWAWTWW	1
541	NR2E3_HUMAN.H10MO.C	AAAGTCAAAAGTCA	1
542	SOX13_HUMAN.H10MO.D	YATTGTTY	1
543	FOXO3_HUMAN.H10MO.B	KRYTTGTTTWCMK	1
544	PO5F1_HUMAN.H10MO.A	CYWTTSWTATGCAAAT	1
545	FOXD3_HUMAN.H10MO.D	TGTTTGTTT	1
546	ARX_HUMAN.H10MO.D	YTAATYTAATTAR	1
547	GBX1_HUMAN.H10MO.D	BTAATTRRYNHWWWWWW	1
548	MSX2_HUMAN.H10MO.D	TAATTDK	1
549	FOXD1_HUMAN.H10MO.D	CWWTGTTTACHTWVR	1
550	CDX1_HUMAN.H10MO.C	HTTTATGD	1
551	TEAD3_HUMAN.H10MO.D	GAHATTYYWGCYBYW	1
552	LHX9_HUMAN.H10MO.D	YTAATTAGYNHWWWWWWD	1
553	NKX62_HUMAN.H10MO.D	NDTTAATKASN	1
554	NANOG_HUMAN.H10MO.A	YYWTTGWNATGCAAATK	1
555	FOXC1_HUMAN.H10MO.C	CDWTGTTTACTTWRG	1
556	FOXP3_HUMAN.H10MO.D	AATKTGWTT	1
557	CDC5L_HUMAN.H10MO.D	GBGWKTTAAYRTAWY	1
558	HXB8_HUMAN.H10MO.C	TTGATTAATKV	1
559	PHX2B_HUMAN.H10MO.D	TAATYTAATTA	1
560	AIRE_HUMAN.H10MO.C	HTTGGWWWWAWTGGDTWH	1
561	DMBX1_HUMAN.H10MO.D	YMMTWWWAAYCYAATTAABD	1
562	SOX9_HUMAN.H10MO.B	YCCATTGTTYT	1
563	FOXF2_HUMAN.H10MO.D	TGTTTACHTWD	1
564	IRX3_HUMAN.H10MO.D	WNWCATGTWMT	1
565	PBX2_HUMAN.H10MO.C	KRAWKTGATTGATKS	1
566	UNC4_HUMAN.H10MO.D	TAATTTAATTA	1
567	HXA5_HUMAN.H10MO.D	YTRATTAATG	1
568	HXD13_HUMAN.H10MO.D	TTTATTAGRGA	1
569	HMGA1_HUMAN.H10MO.D	NWATTTT	1
570	BSH_HUMAN.H10MO.D	YVATTAACBMATTA	1
571	ZN713_HUMAN.H10MO.D	RWAGAARAADGVSANGMAA	1
572	DRGX_HUMAN.H10MO.D	TAATYTAATTA	1
573	HXB7_HUMAN.H10MO.C	TTGATTRATK	1
574	PHX2A_HUMAN.H10MO.D	TAATYTAATTA	1
575	OTX2_HUMAN.H10MO.C	KHDMWVGGATTARRK	1
576	VENTX_HUMAN.H10MO.D	YVYTAATYGSTTHHHWWTT	1
577	FOXG1_HUMAN.H10MO.D	DTTGTTTAYDTWTDTTT	1
578	PITX3_HUMAN.H10MO.D	RGGGDWTWAAGGGATTAR	1
579	HNF6_HUMAN.H10MO.C	WWTATTGATTTWDH	1
580	P5F1B_HUMAN.H10MO.D	DMATTTGCATATTYAW	1
581	MNX1_HUMAN.H10MO.D	MBATTTDHWTHWCYHYTHH	1
582	DLX1_HUMAN.H10MO.D	WWWWWTATGSTAATTA	1
583	HXC13_HUMAN.H10MO.D	DDTTTTACKAG	1
584	PO6F1_HUMAN.H10MO.D	CATAAWTTATGCR	1
585	HXD10_HUMAN.H10MO.D	TGCTTTAATT	1
586	SOX5_HUMAN.H10MO.C	YATTGTTW	1
587	ZN232_HUMAN.H10MO.D	TGTTAAAYGTAGATTAAGY	1
588	EVX2_HUMAN.H10MO.A	TTTTATKRCHYH	1
589	HXC8_HUMAN.H10MO.D	YTTSATTRATDSSC	1
590	FOXJ3_HUMAN.H10MO.S	TKKTTWWTGTTTA	1
591	ZFHX3_HUMAN.H10MO.D	ATTAWTAATTA	1
592	GSX1_HUMAN.H10MO.D	TAATTAGNDDTTAAT	1
593	ETV2_HUMAN.H10MO.D	YNYKRTTTYND	1
594	DLX5_HUMAN.H10MO.D	AATTWDNBDTAATT	1
595	HXD11_HUMAN.H10MO.D	DWTTTATKRHN	1
596	MEF2B_HUMAN.H10MO.D	TGTTRCTATWWATAGC	1
597	SOX8_HUMAN.H10MO.D	WSACTGMAATTGATKY	1
598	LMX1B_HUMAN.H10MO.D	TAATTAAHWVMYTWWWWW	1
599	HXB3_HUMAN.H10MO.D	YTAATTASYTTTTW	1
600	ONEC2_HUMAN.H10MO.D	DKSWTKWTATKGATTTTTYYT	1
601	FUBP1_HUMAN.H10MO.D	TYGTNTTTTTTT	1
602	ALX1_HUMAN.H10MO.B	RTAATTRVATTA	1
603	FOXQ1_HUMAN.H10MO.C	HATTGTTTATTT	1
604	PO4F1_HUMAN.H10MO.D	CATTAATTATTCAT	1
605	FOXB1_HUMAN.H10MO.D	RTMAATRTTTACATAAB	1
606	NKX31_HUMAN.H10MO.C	WWTAAGTATWTWW	1
607	FOXD2_HUMAN.H10MO.D	WAWGTAAATRTTWWYTTAA	1
608	MEF2C_HUMAN.H10MO.C	DKCTATTTTTRGM	1
609	PAX3_HUMAN.H10MO.D	GWTAATYGATTAW	1
610	HNF1B_HUMAN.H10MO.B	RGTTAATRWTTAAC	1
611	HMGA2_HUMAN.H10MO.D	AATWWYSSSSAATAT	1
612	HXD4_HUMAN.H10MO.D	TTAATTGW	1
613	NKX61_HUMAN.H10MO.D	WWTTAATKASBTTTWAWTD	1
614	HMX1_HUMAN.H10MO.D	DTTAATTGHTTTTTAAT	1
615	EVX1_HUMAN.H10MO.D	TDHTWDTWTGTTTACTTAWM	1
616	MSX1_HUMAN.H10MO.D	TAATTGSWWKTTAATTGS	1
617	HXD9_HUMAN.H10MO.D	ARWTTNATKD	1
618	PIT1_HUMAN.H10MO.C	YTMATGAATATWY	1
619	PAX7_HUMAN.H10MO.D	TAATYGATTAW	1
620	MEF2A_HUMAN.H10MO.A	DKCTATTTTTRGM	1
621	PO2F2_HUMAN.H10MO.D	WMATTTGCATAWTYAW	1
622	BARX1_HUMAN.H10MO.D	TAATYGNTWTTTAATKG	1
623	HXD12_HUMAN.H10MO.D	DDTTTTAHKRN	1
624	PO3F4_HUMAN.H10MO.D	TMATTTGCATAATTWAW	1
625	FOXM1_HUMAN.H10MO.D	BTTGWKTGWTTWY	1
626	HXC12_HUMAN.H10MO.D	DTTTTAYKACYT	1
627	HNF1A_HUMAN.H10MO.A	RGTTAATMWTTAMCM	1
628	PO4F3_HUMAN.H10MO.D	TCATTAATTATKCAT	1
629	GSX2_HUMAN.H10MO.D	YTAATTRSHWWTTAAT	1
630	PO3F3_HUMAN.H10MO.D	WWWAWTTATGCWWATTW	1
631	FOXO1_HUMAN.H10MO.C	DDBTTGTTTWBWWTTT	1
632	PO3F2_HUMAN.H10MO.D	AWWATTYATG	1
633	HXA11_HUMAN.H10MO.D	TWAADTTTTAYGR	1
634	CPEB1_HUMAN.H10MO.D	TTTTTATTYTTTTTTTT	1
635	ARI3A_HUMAN.H10MO.D	RATTAAWBRRWATCAAAWTWWA	1
636	FOXL1_HUMAN.H10MO.D	TKTTTGTTTRTTTAYWTTT	1
637	LMX1A_HUMAN.H10MO.D	TAATTAATTWKKTWATTWW	1
638	SRY_HUMAN.H10MO.B	YWTTGTTTH	1
639	HXC10_HUMAN.H10MO.D	WWWWWWWNNWTTTWATKRC	1
640	HXC6_HUMAN.H10MO.D	ATGATTTATTACTTT	1
641	KLF6_HUMAN.H10MO.D	GGGGGCKG	1
