# Supplementary material for: WNT signaling memory is required for ACTIVIN to function as a morphogen in human gastruloids
Source: eLife. 2018 Oct 12;7:e38279. doi: 10.7554/eLife.38279 (PMC6234031; doi:10.7554/eLife.38279)
Supplement: Figure 4—source data 5. [file elife-38279-fig4-data5.xlsx]

## Sheet: Sheet1
Group	Mouse tissue	Observed in group	Expected in group	Observed/Expected	p-value
1	Endoderm	129	40.8283	3.15958	6.5206e-31
1	Ectoderm/Epiblast	16	8.54871	1.87163	0.0122962
1	Mesoderm	31	10.2771	3.0164	4.72379e-08
2	Endoderm	27	5.79914	4.65587	6.29081e-11
2	Ectoderm/Epiblast	6	1.21424	4.94138	0.00147406
2	Mesoderm	15	1.45974	10.2758	3.06009e-11
3	Endoderm	8	1.49372	5.35577	0.000133827
3	Ectoderm/Epiblast	5	0.312758	15.9868	1.67972e-05
3	Mesoderm	2	0.375993	5.31925	0.0547966
