# Supplementary material for: WNT signaling memory is required for ACTIVIN to function as a morphogen in human gastruloids
Source: eLife. 2018 Oct 12;7:e38279. doi: 10.7554/eLife.38279 (PMC6234031; doi:10.7554/eLife.38279)
Supplement: Figure 4—source data 6. [file elife-38279-fig4-data6.xlsx]

## Sheet: ClustersAndSets.csv
Comparison	Genes
Cluster 1 and Endoderm	AASS;ABCD3;ACADM;ACBD5;ACSL3;AK3;APOB;ARHGAP18;ASAH1;ATP13A3;ATP2B1;ATP6V1A;C12orf4;C1GALT1;CAMK2D;CCPG1;CHMP2B;CHN2;CLCN3;CLTC;COBLL1;COQ10B;CPD;CPEB4;CRYZ;DDX58;DENND5B;DEPDC7;DMXL1;DNAJC13;DSC2;DSG2;DSP;DYNLT3;EDEM3;EEA1;EIF2AK2;EMB;ENPEP;ENPP5;EPS8;EVI5;EXOC6;FAM107B;FAM69A;FAM84B;FLRT3;FNDC3A;FRMD4B;FZD5;FZD6;GAB1;GIPC2;GNB4;GNG12;GNPTAB;GOLGA4;GPAM;HPS3;ID2;INPP5F;IQGAP2;ITSN2;JAK2;KDELC2;K…
Cluster 1 and Ectoderm/Epiblast	ALCAM;CCDC160;FST;FZD10;GBX2;GRB14;ITGA6;JAKMIP2;LPAR4;LRRN1;MCF2;OTX2;PROM1;RRAGB;USP44;ZIC5;
Cluster 1 and Mesoderm	ANPEP;AP1S2;ATP11C;BCAP29;CDK14;FLT1;FRMD6;FZD1;GADD45G;HAS2;HEG1;IL6ST;LIMCH1;NEXN;PCDH19;PCDH8;PDGFRA;PRTG;PTCH1;RBMS1;RGS5;ROBO1;SLC25A24;SLC38A4;SLC39A6;TGFBI;TOP2B;TSPAN2;VCAN;WNT5A;ZNF711;
Cluster 2 and Endoderm	AGRN;CDH6;CER1;CHST15;DPP7;ESPN;FAM20C;FGFR4;FOXO4;FURIN;GAL3ST1;GAS2L1;JUNB;KIFC3;METTL7A;NEDD9;PGPEP1;PLBD1;RHPN1;RNF208;RNPEPL1;SLC25A10;SLC43A2;SORCS2;TFEB;UAP1L1;UBE2QL1;
Cluster 2 and Ectoderm/Epiblast	MIXL1;NANOG;NKX1-2;SBK1;TFAP2C;WNT8A;
Cluster 2 and Mesoderm	ADAM19;BMP4;CBLN1;CXCR4;DAAM2;DACT1;ENG;FBLN2;GCHFR;HTRA1;LEFTY2;MFAP4;MRPS6;PHLDA2;SMAD6;
Cluster 3 and Endoderm	A4GALT;CITED1;DLK1;FOXJ1;GPRC5C;GPX2;HMOX1;SOD3;
Cluster 3 and Ectoderm/Epiblast	CEND1;CNTFR;FAM57B;HES3;RTN4RL2;
Cluster 3 and Mesoderm	CRB2;VASN;
