# Supplementary material for: WNT signaling memory is required for ACTIVIN to function as a morphogen in human gastruloids
Source: eLife journal article supplement (doi:10.7554/elife.38279), 2018-10-12

**A**

Stitched colony image  
(nuclear channel)

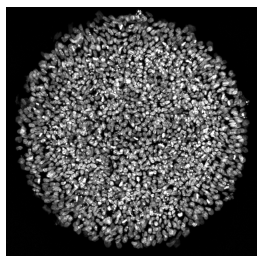

Foreground mask

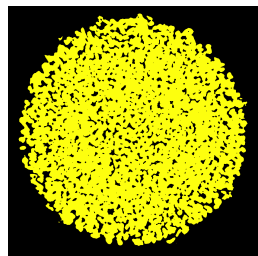

Seeding

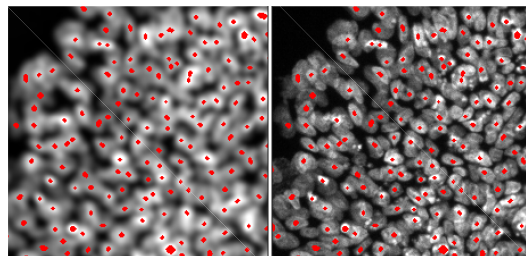

Watershed

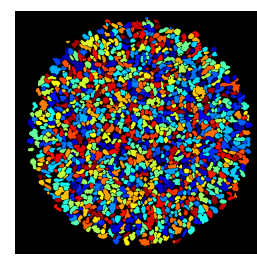**B**

+ BMP4 (50 ng/mL)

Pre-stimulus

T = 1 h

T = 2 h

T = 8 h

T = 12 h

SMAD1  
(nuclear)

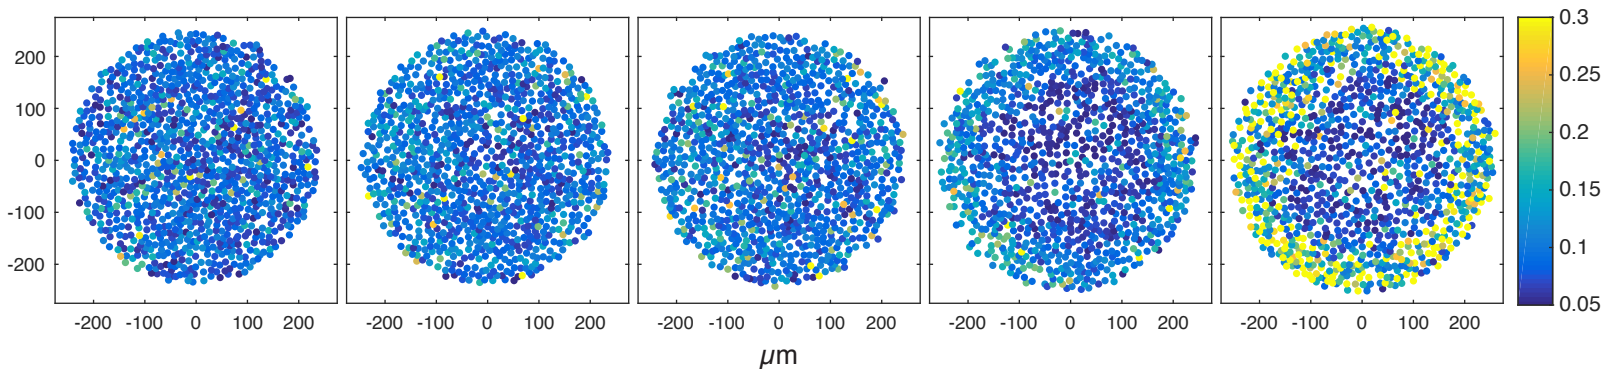**C**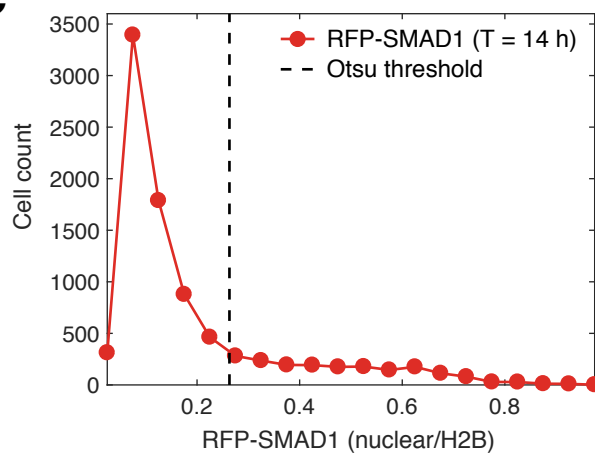**D**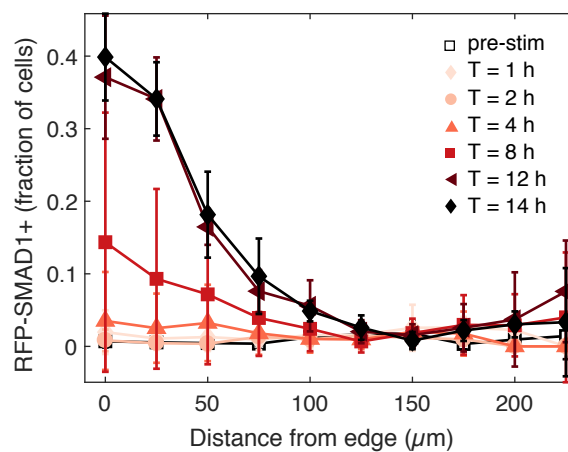**E**

+ ACTIVIN (10 ng/mL)

Pre-stimulus

T = 1 h

T = 2 h

T = 4 h

T = 12 h

SMAD2  
(nuc-to-cyto)

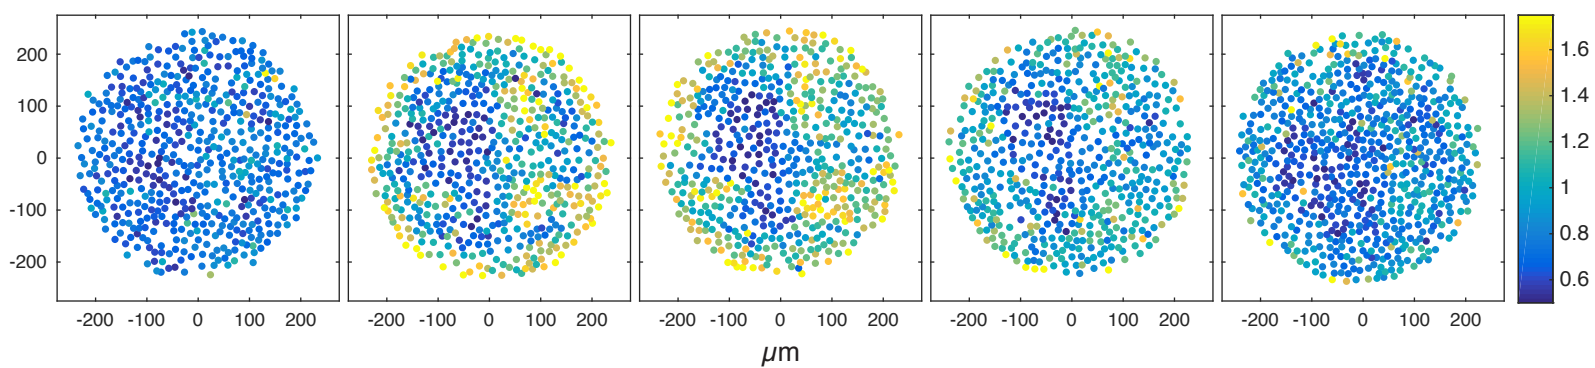

Supplement: supp [file elife_poa_e38279_Figure_2_figure_supplement_2.pdf › elife_poa_e38279_Figure_2_figure_supplement_2.pdf]
