# Supplementary figures and images for: WNT signaling memory is required for ACTIVIN to function as a morphogen in human gastruloids
Source: eLife journal article supplement (doi:10.7554/elife.38279), 2018-10-12

**A**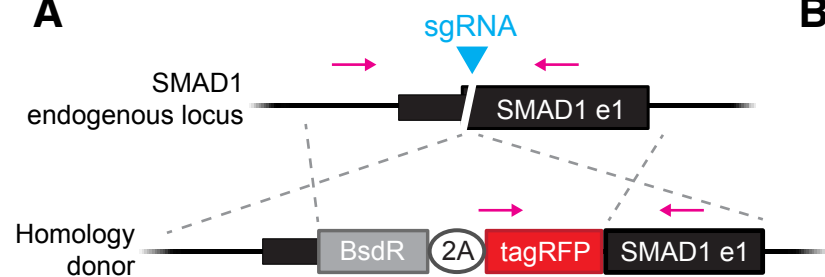**B**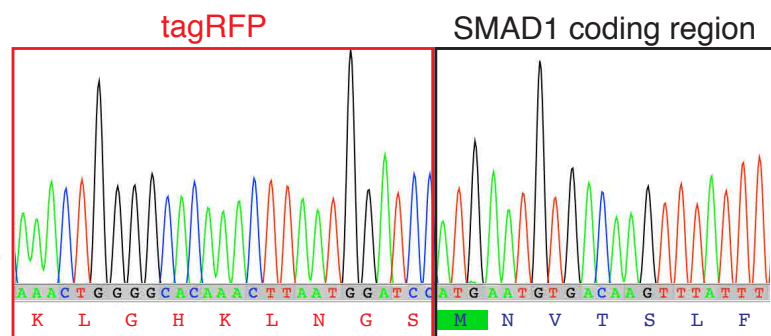**C**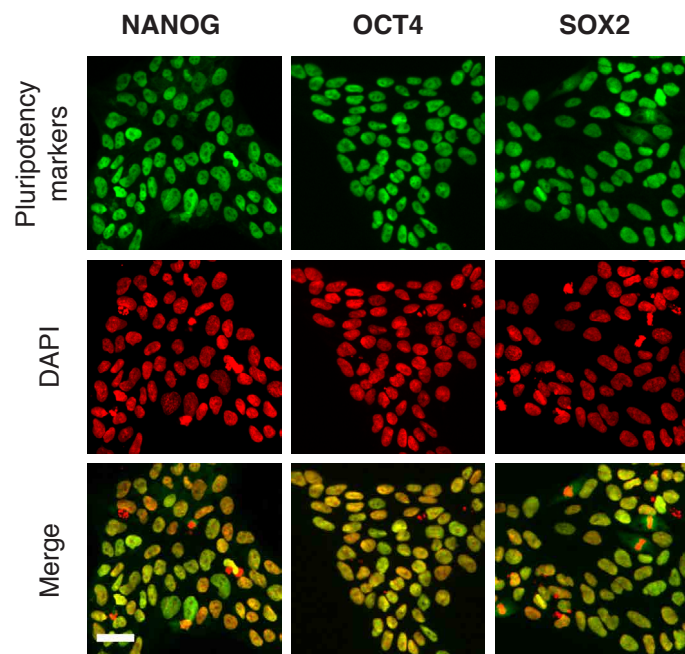**D**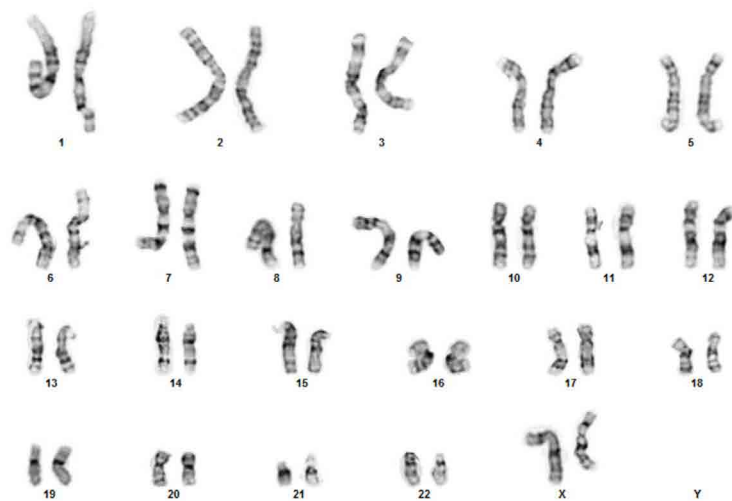**E**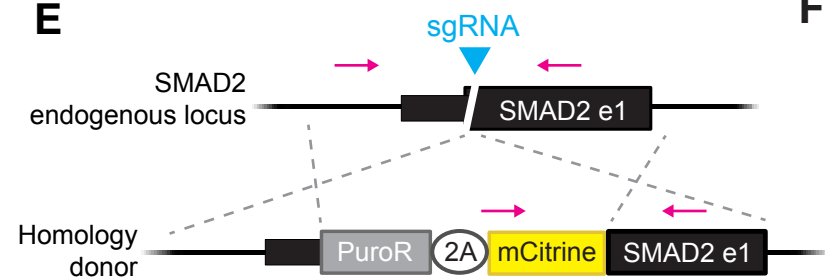**F**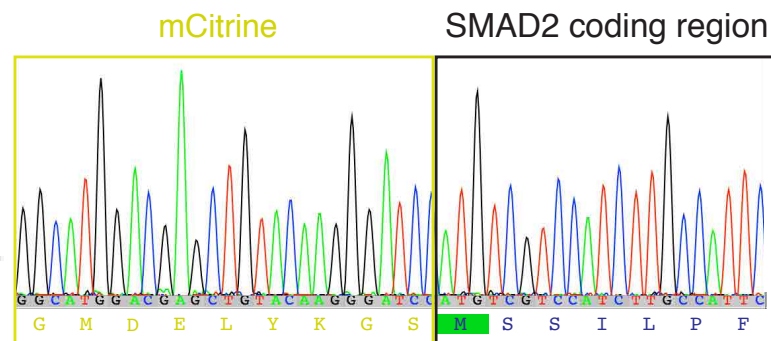**G**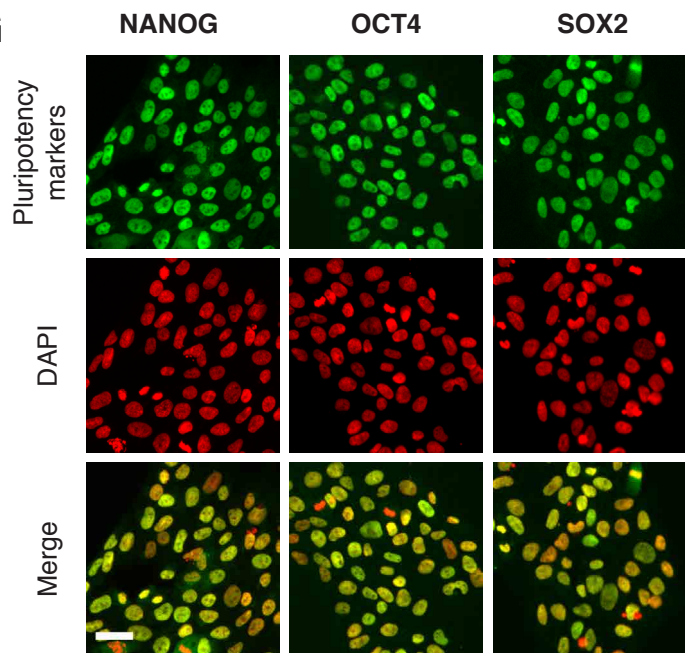**H**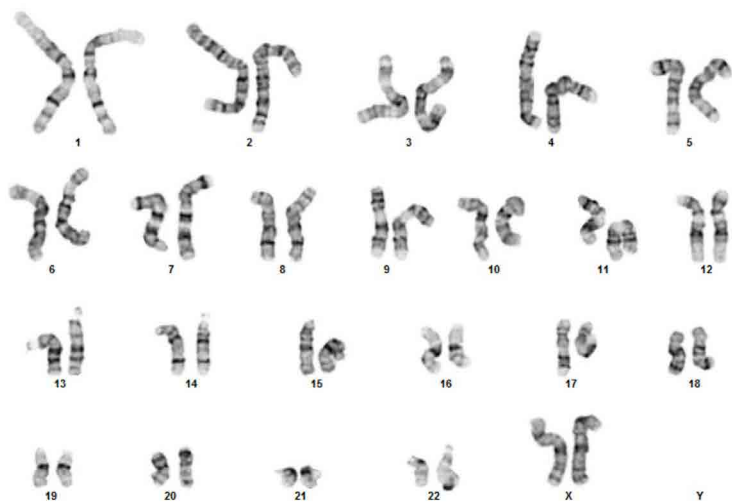

Supplement: supp [file elife_poa_e38279_Figure_2_figure_supplement_1.pdf › elife_poa_e38279_Figure_2_figure_supplement_1.pdf]

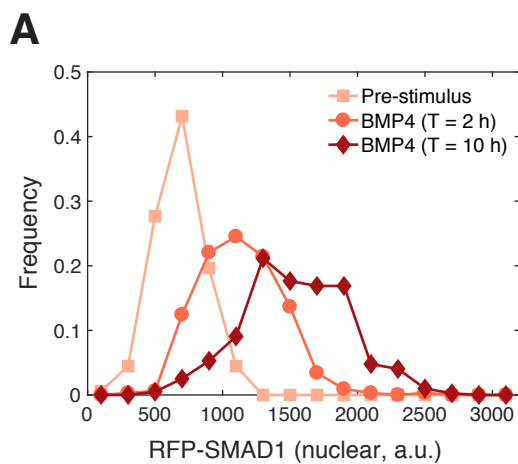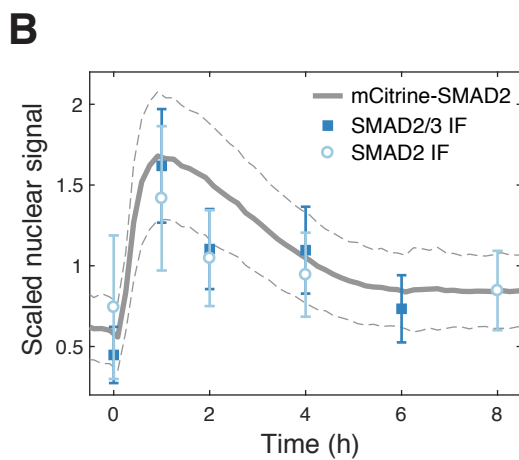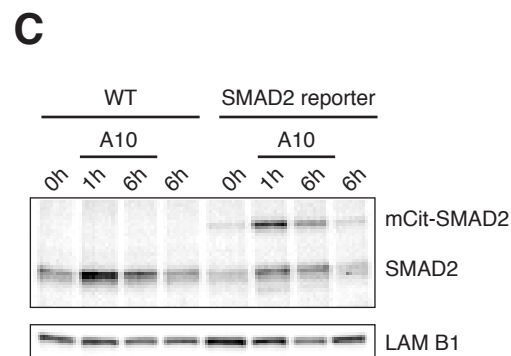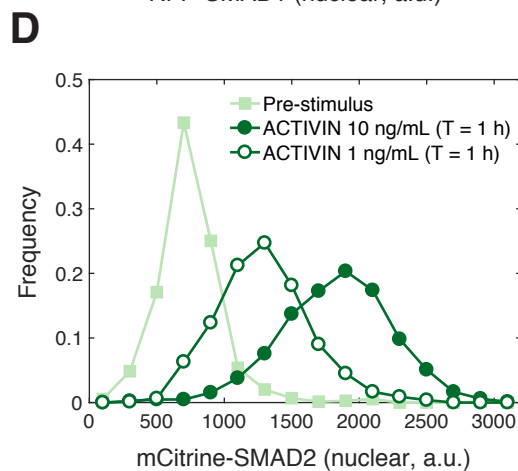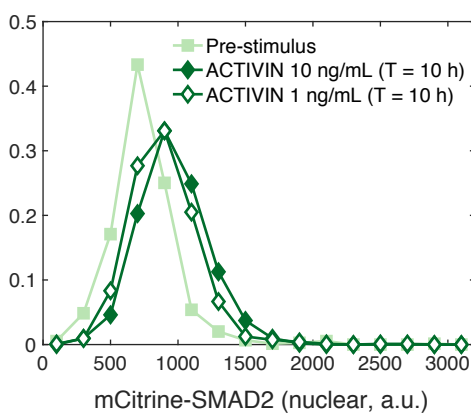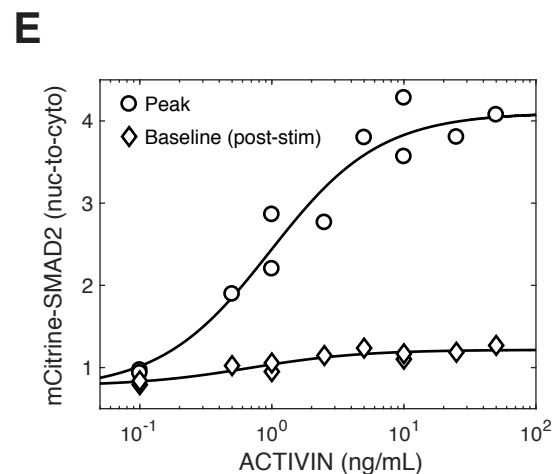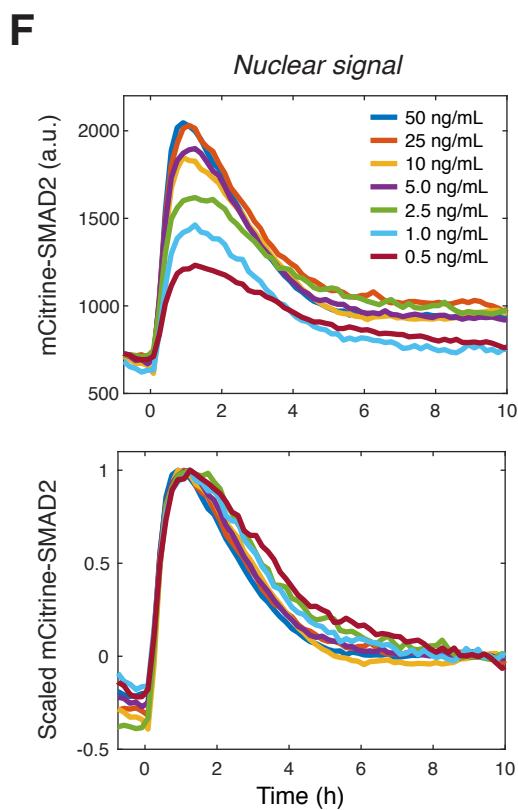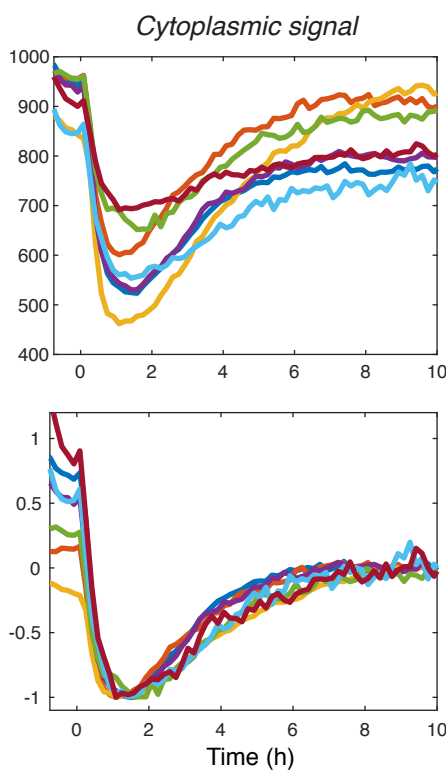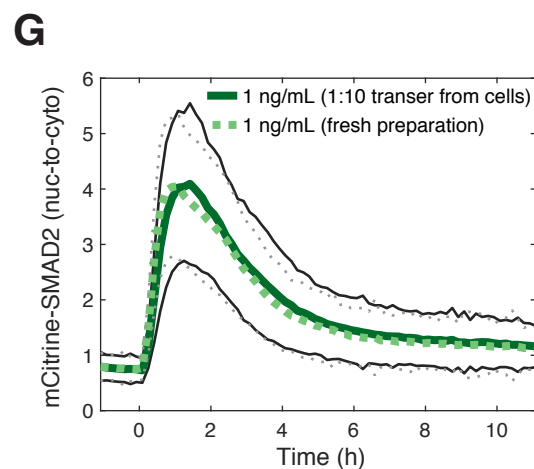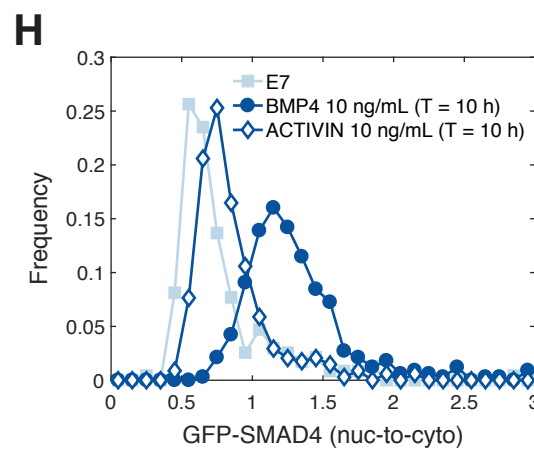

Supplement: supp [file elife_poa_e38279_Figure_3_figure_supplement_1.pdf › elife_poa_e38279_Figure_3_figure_supplement_1.pdf]

**A**

### Motif enrichment

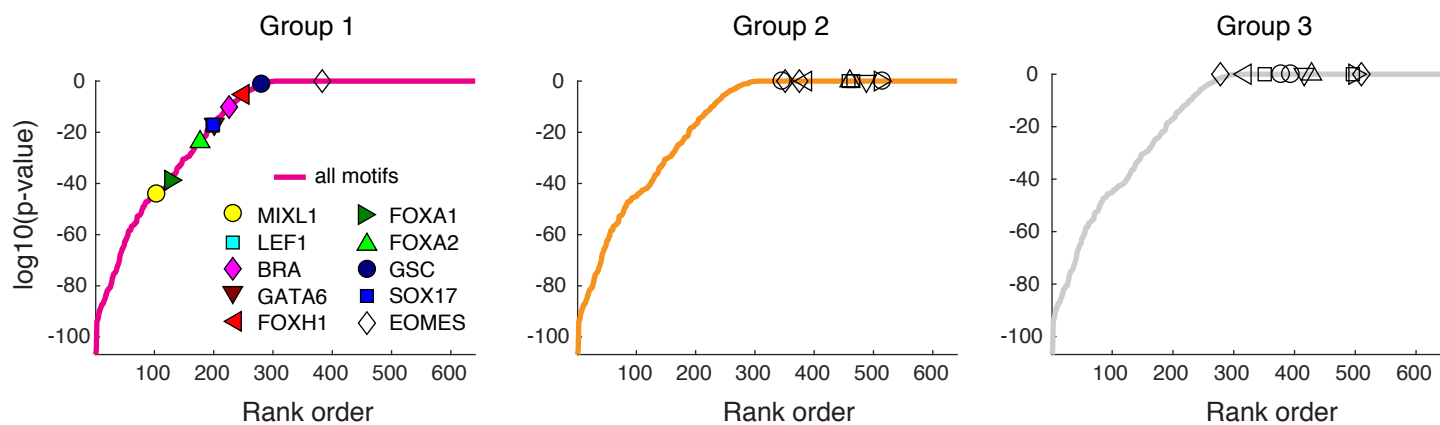**B**

### Gene enrichment

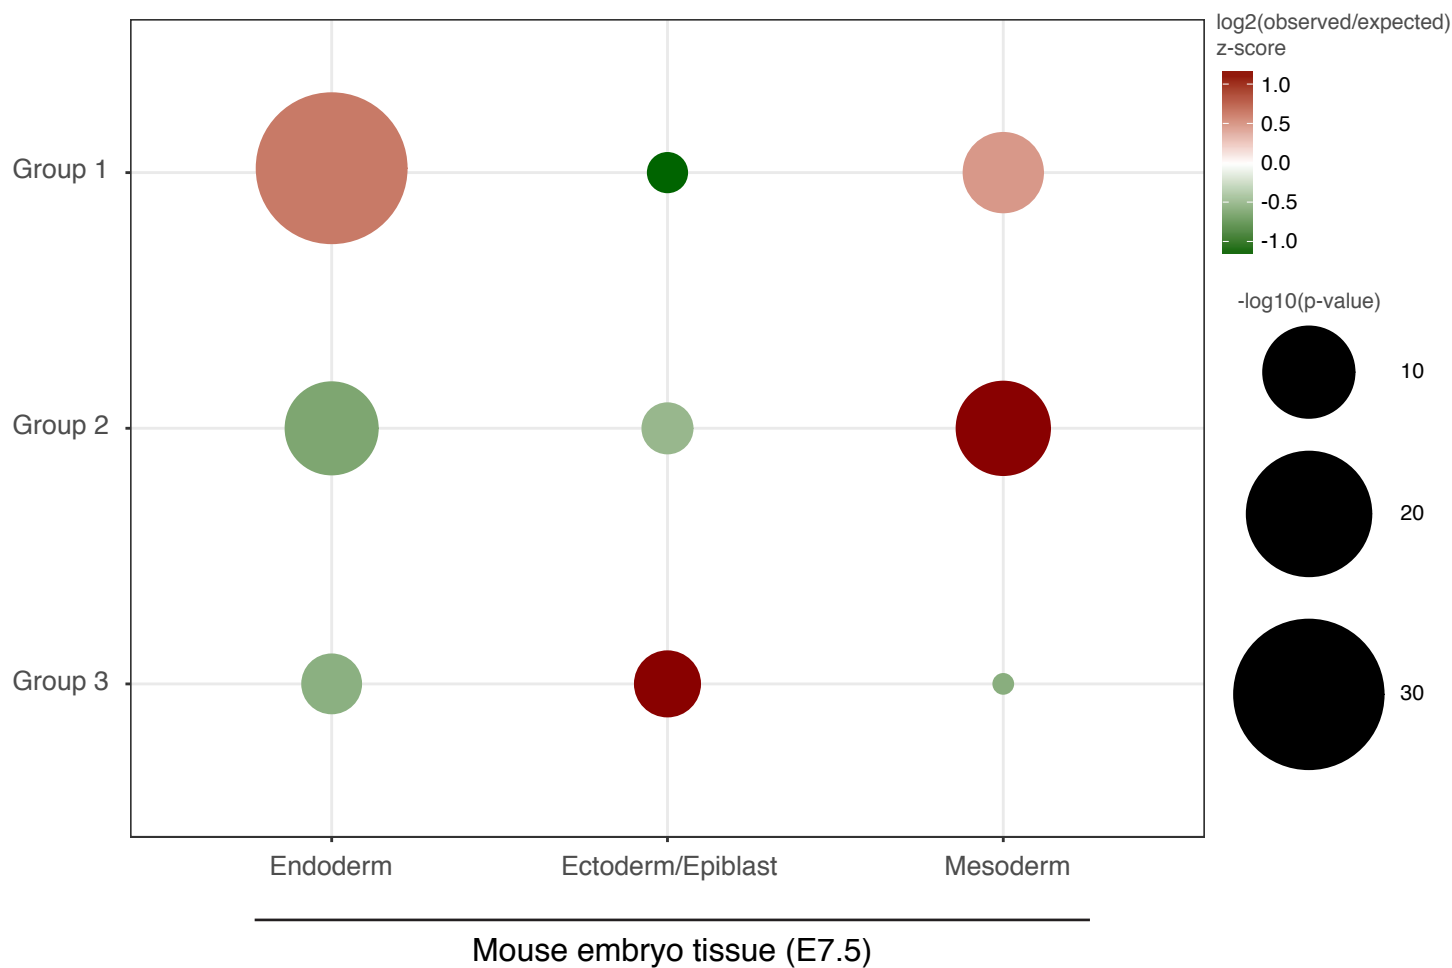

Supplement: supp [file elife_poa_e38279_Figure_4_figure_supplement_1.pdf › elife_poa_e38279_Figure_4_figure_supplement_1.pdf]

**A****SMAD3 gene (annotated transcripts)**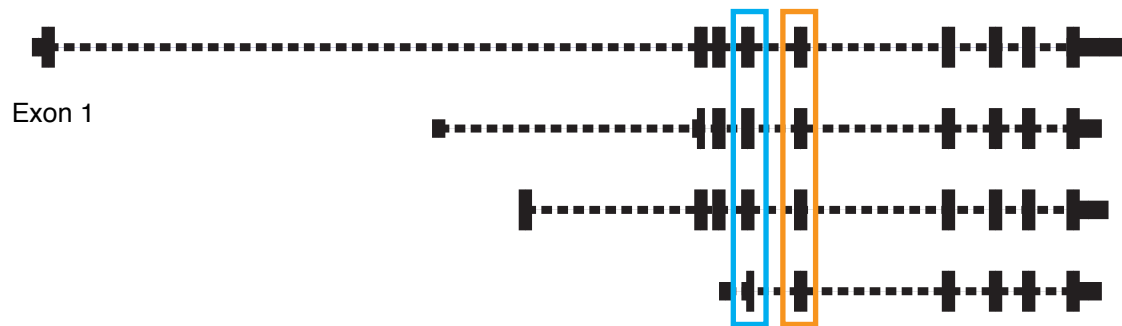**B****sgRNA #1**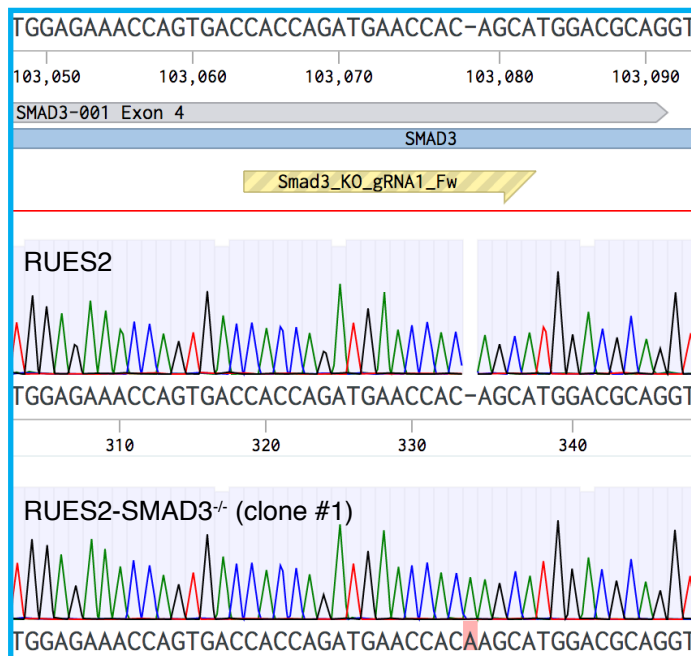**sgRNA #2**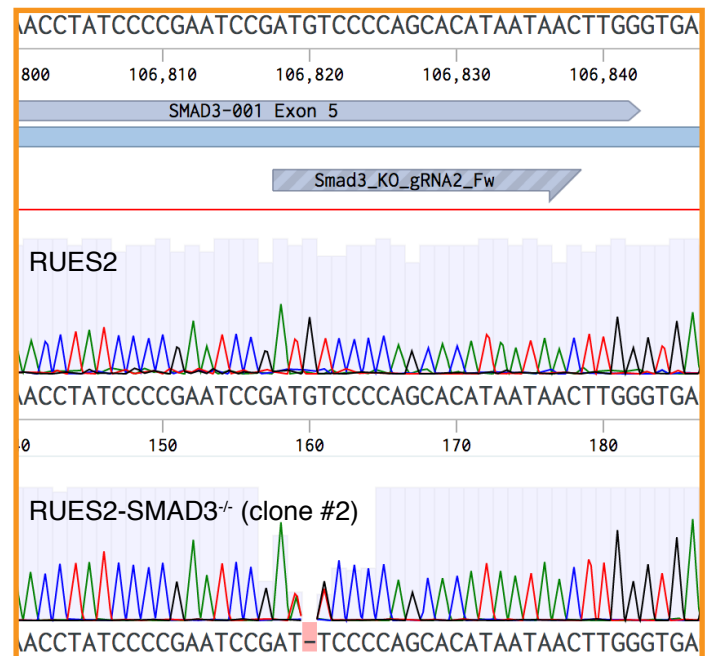**C****NANOG**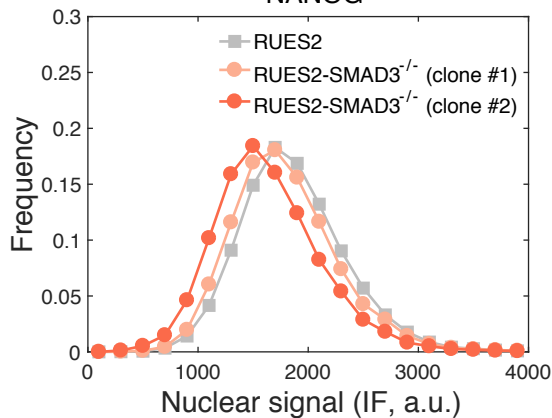**OCT4**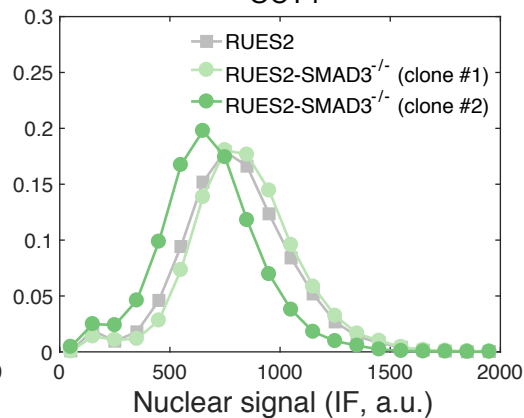**SOX2**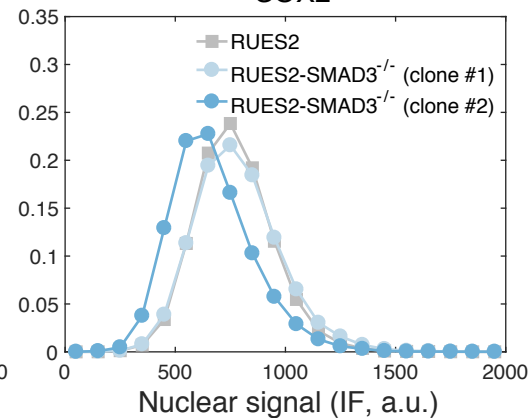

Supplement: supp [file elife_poa_e38279_Figure_4_figure_supplement_2.pdf › elife_poa_e38279_Figure_4_figure_supplement_2.pdf]

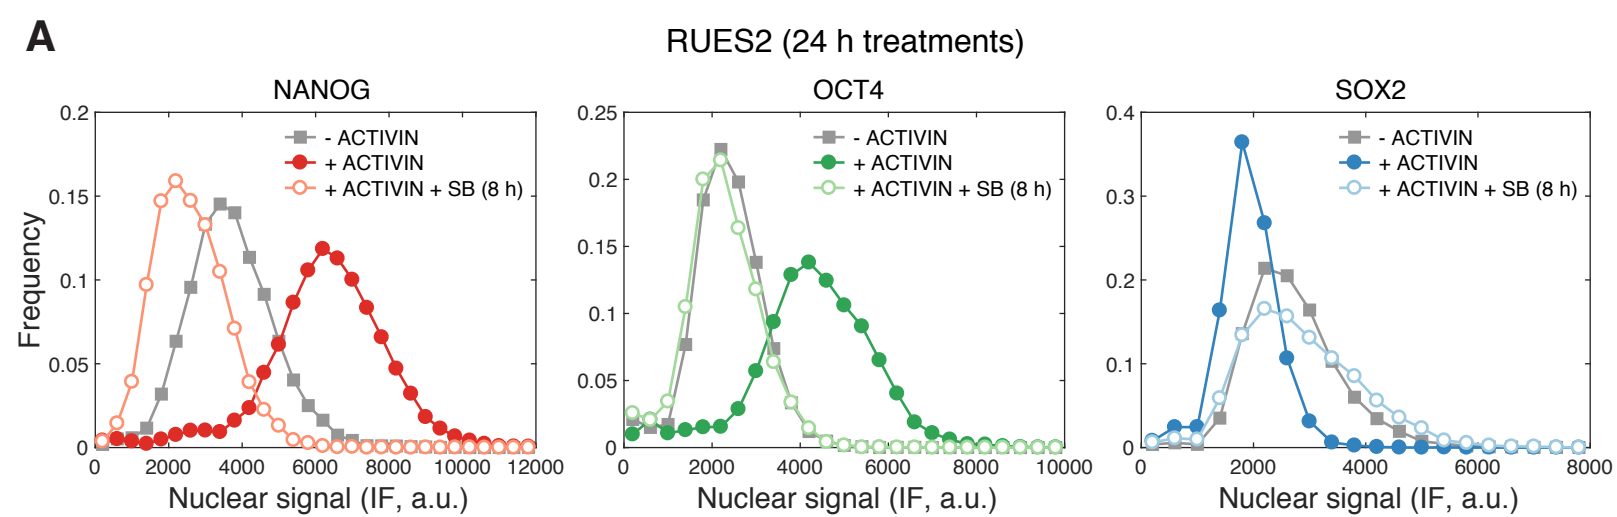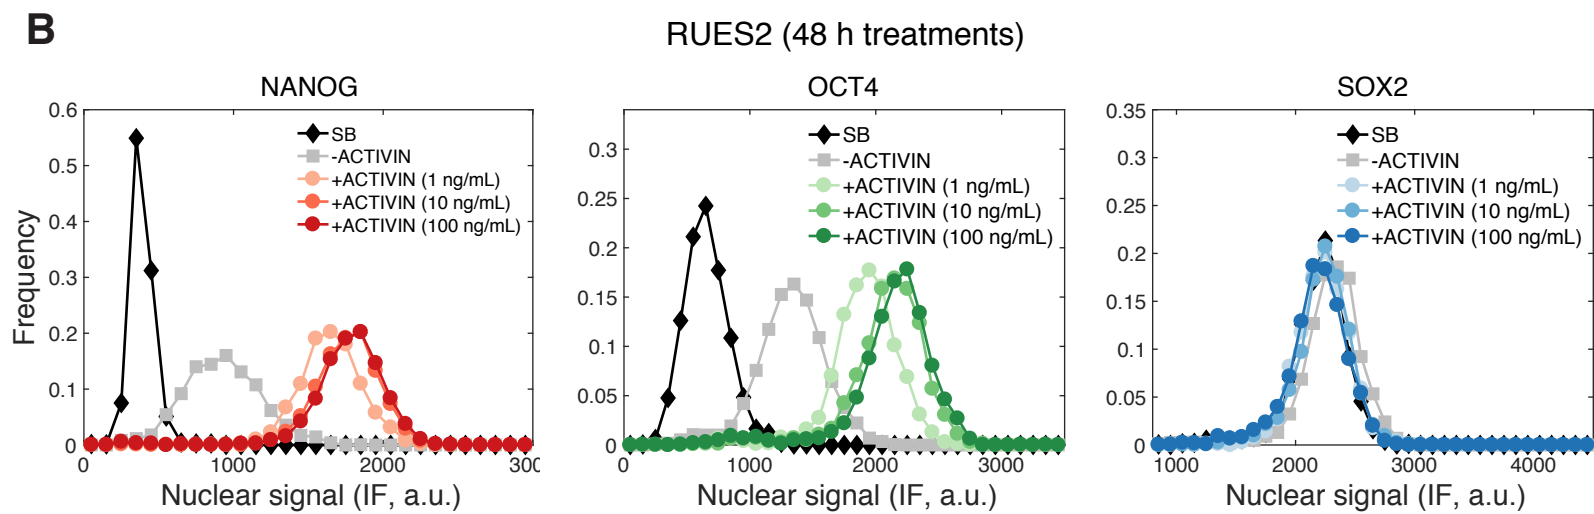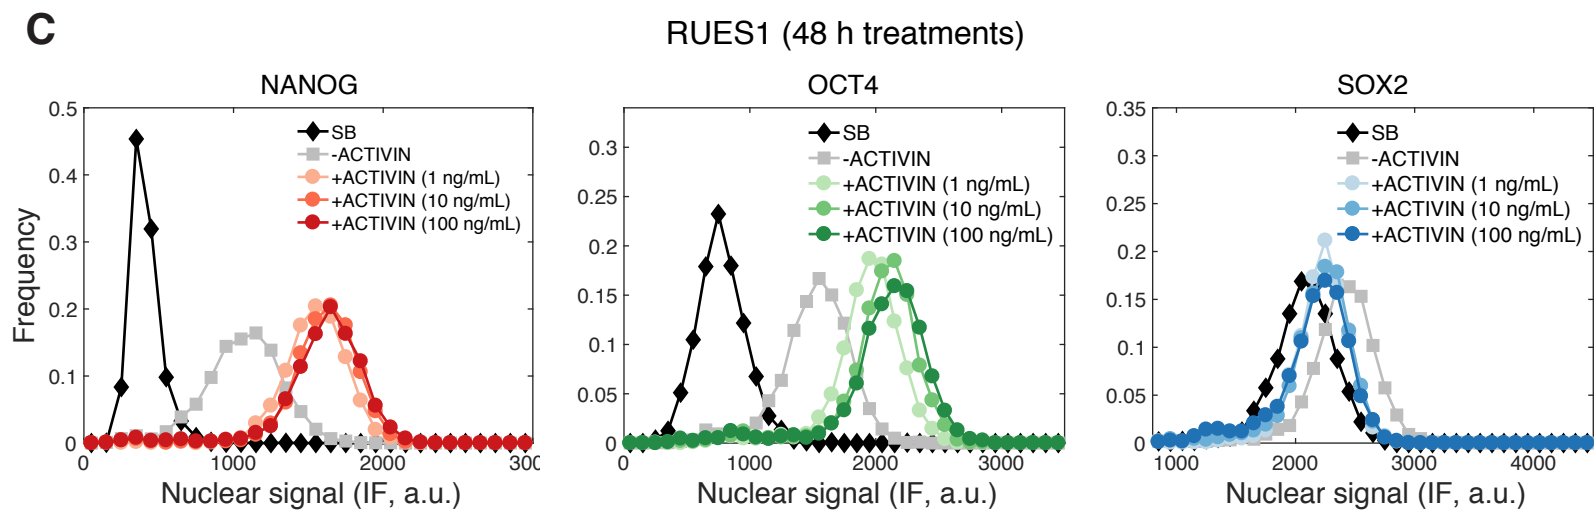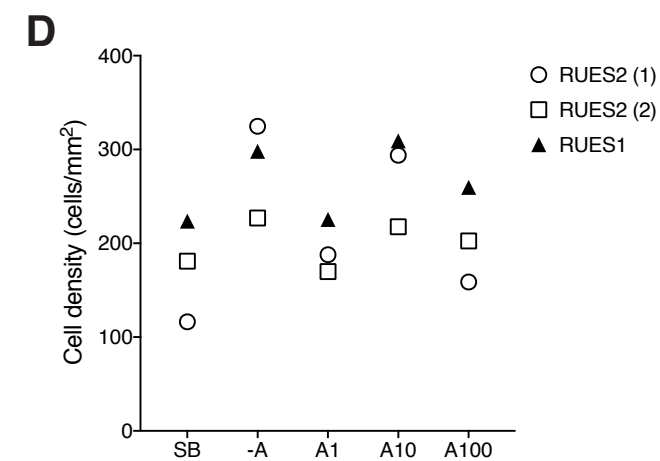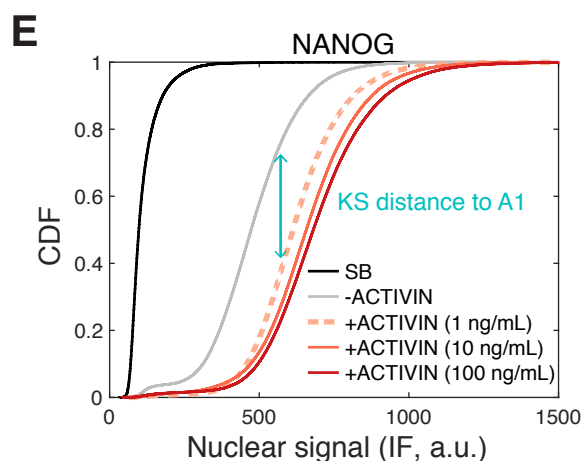

Supplement: supp [file elife_poa_e38279_Figure_5_figure_supplement_1.pdf › elife_poa_e38279_Figure_5_figure_supplement_1.pdf]

# Mesendoderm (RUES2-SMAD3<sup>-/-</sup> clone #2)

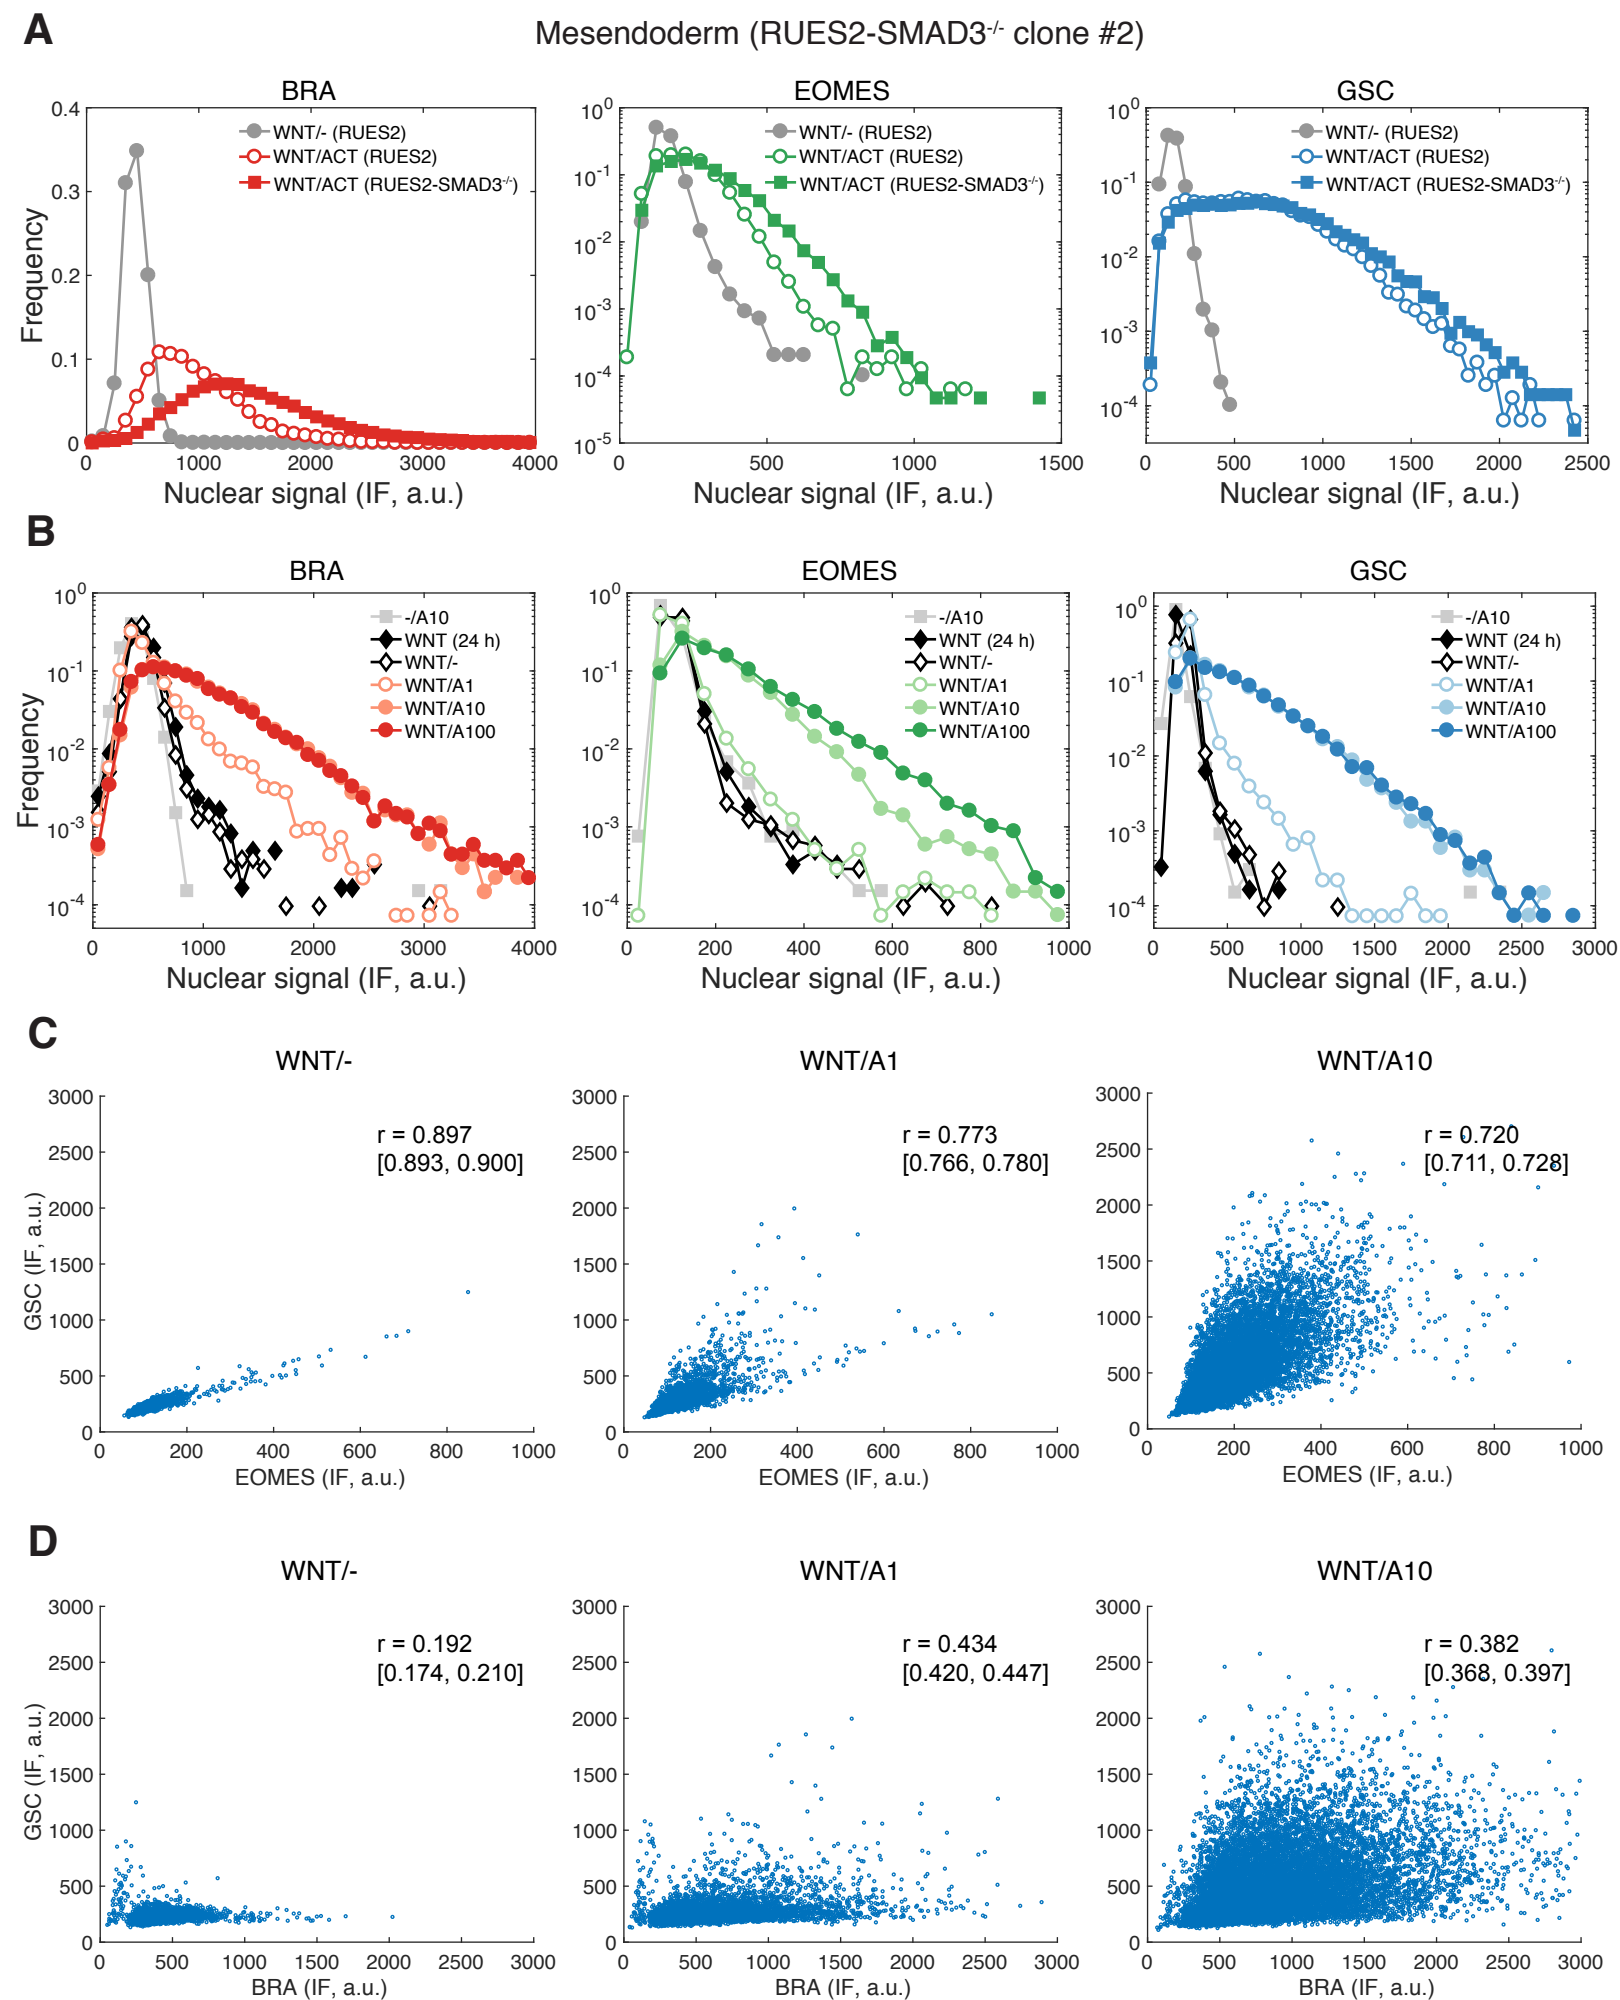

Supplement: supp [file elife_poa_e38279_Figure_6_figure_supplement_1.pdf › elife_poa_e38279_Figure_6_figure_supplement_1.pdf]

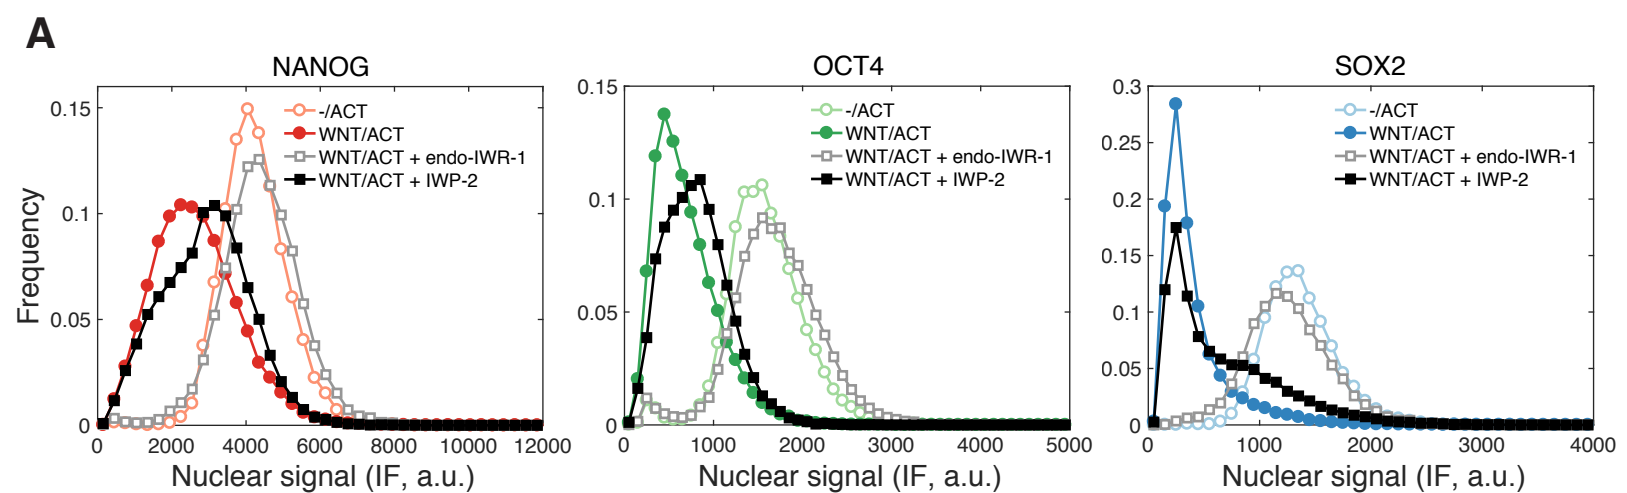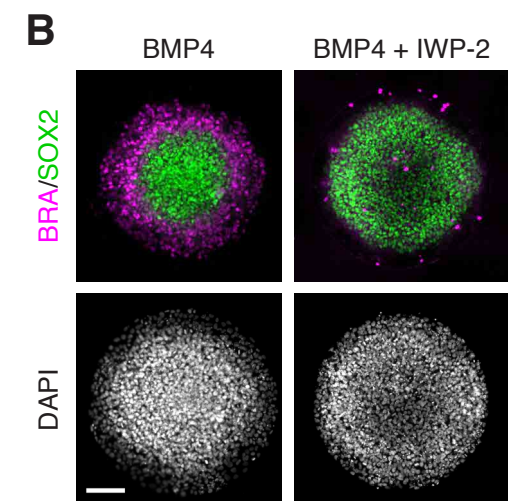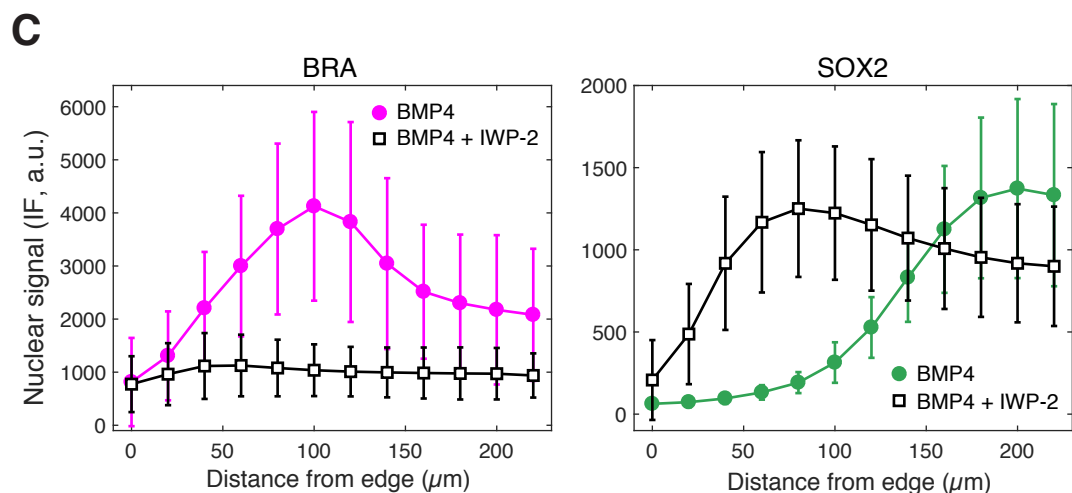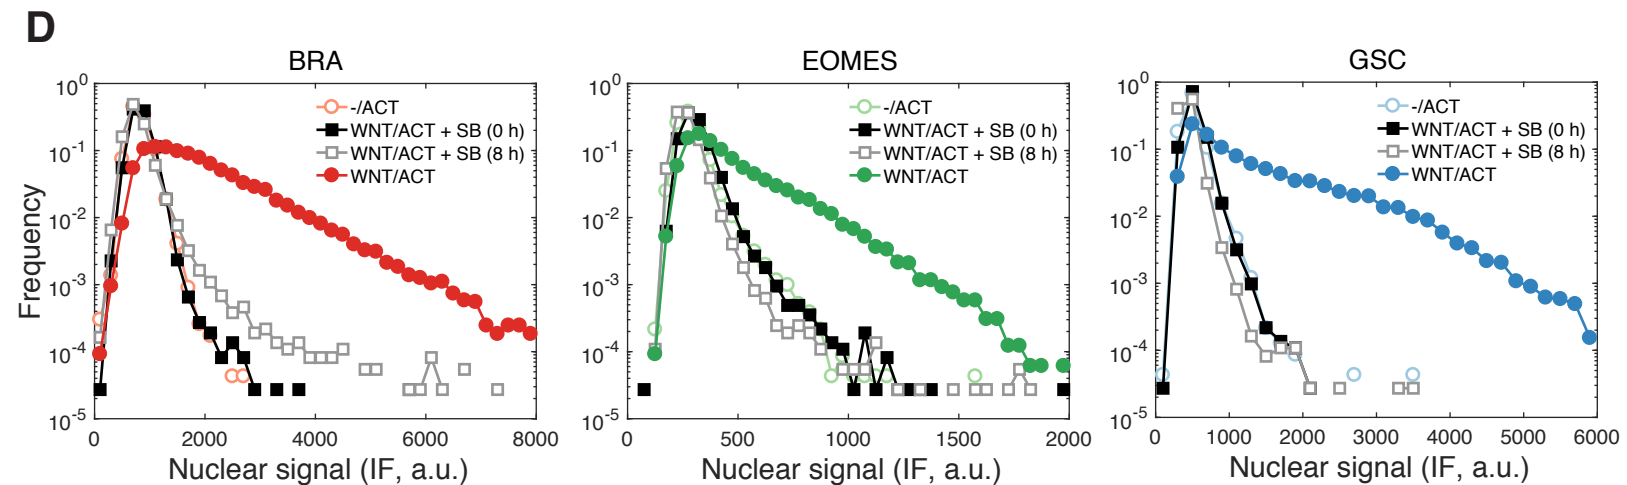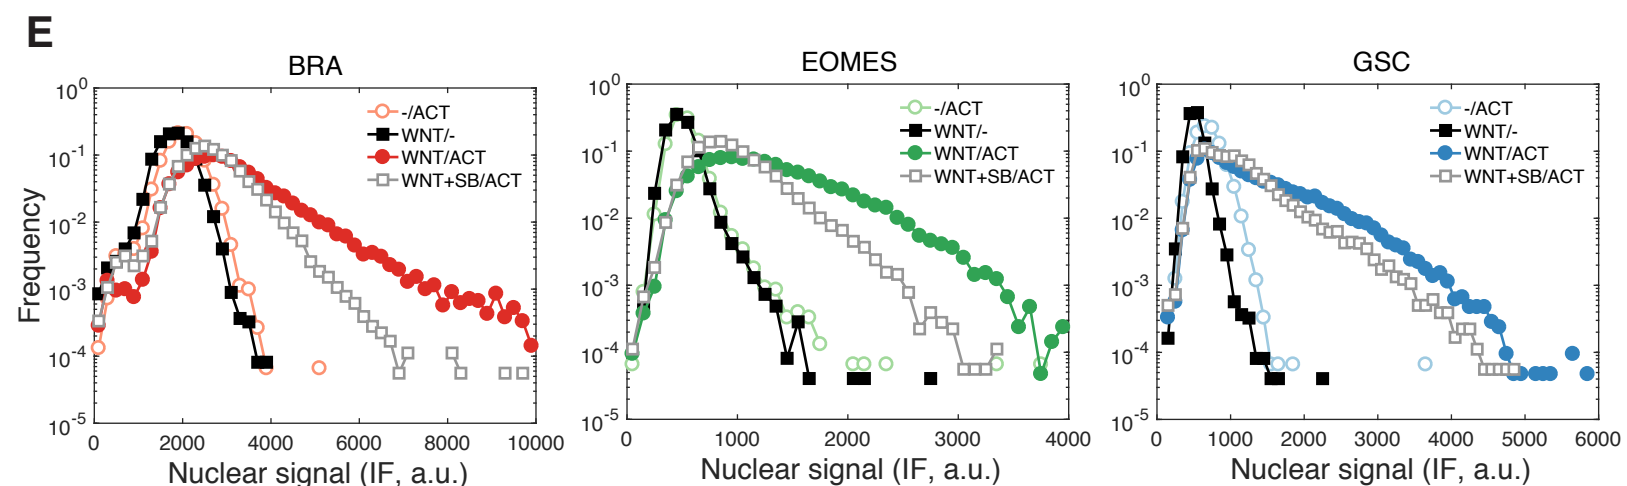

Supplement: supp [file elife_poa_e38279_Figure_7_figure_supplement_1.pdf › elife_poa_e38279_Figure_7_figure_supplement_1.pdf]
